# Supplementary material for: Isotopic composition for source identification of mercury in atmospheric fine particles
Source: Copernicus journal article supplement (doi:10.5194/acp-2016-363), 2016-06-08
Supplement: Supplementary file [file acp-2016-363-AC1-supplement.pdf]

## Detailed Responses to Referees

### 5 1. Anonymous Referee #2

Received and published: 24 June 2016

10 Huang et al. reported mercury isotope signatures on atmospheric particles in an urban environment, as well as in potential particulate Hg sources. Seasonal variations are observed, and discussed as differences in particle emission sources (Biomass burning, coal combustion, smelting, long-range transport). The approach used makes sense and the overall discussion is of good quality. I have a few comments and questions that could help to improve the discussion:

15

1) First, as mentioned in the text, atmospheric processes can affect Hg isotope composition. The authors only discussed the variations in terms of different sources, with mainly local emission sources as well as long range transport of PM<sub>2.5</sub>-Hg. I wonder if the presence of PM<sub>2.5</sub> can modify the atmospheric Hg speciation, enhancing oxidation of GEM and/or RGM binding on particles. In other words, does 20 PM<sub>2.5</sub> and Hg necessarily have the same source? I expected more discussion on atmospheric Hg dynamics.

-- We appreciate very much that the reviewer raised a very important issue, and we 25 understand that PM<sub>2.5</sub> (the host) and particulate bound Hg may or may not be of the same source(s) as Hg is variously reactive in the atmosphere and it could be redistributed between PM<sub>2.5</sub> and gaseous phase under atmospheric conditions after emission. It is intuitive that, after emitted, the contents of PM-bound Hg may decrease as a function of time as the Hg bound on PM from the sources may be 30 photochemically reduced to Hg<sup>0</sup>. At the same time, Hg oxidized from Hg<sup>0</sup> at the surface of PM or within the gaseous phase may become associated with the PM. The inter-exchanging processes especially driven by photolysis between PM<sub>2.5</sub> bound Hg and gaseous Hg no doubt can change not only the mass content of Hg bound on PM<sub>2.5</sub>, but also the Hg isotope compositions. Given the fact that individual particles

35 of each PM<sub>2.5</sub> sample may have very different residence time in the atmosphere, they  
may have experienced varied degrees of secondary alterations. However, at current  
stage of our understanding on such a complex and dynamic system with multiple  
physicochemical processes, we could not assess the exact impact of such complex  
processes on both the content and isotope composition of PM bound Hg.

40

-- It is known that the atmospheric system is very complex. The measured mercury  
isotope compositions for PM<sub>2.5</sub> samples may be results of (i) mixing (physical  
processes) of multiple sources of mercury, (ii) isotope fractionation caused by  
multiple processes including photolytic reduction and oxidation of Hg in both gaseous  
45 and particulate phases, and (iii) distribution of mercury among the three operationally  
defined classes of mercury in the atmosphere. In this paper, we do have a short  
discussion on the effect of possible natural processes, including secondary aerosol  
production, adsorption (and desorption) and redox reactions, on Hg isotopic  
fractionation in the atmosphere. Such effect may be particularly prominent for some  
50 Hg (especially the long-range transported Hg) in a specific place, but at this stage it is  
impossible to evaluate the exact contribution of these processes to the total budget of  
Hg in the fine particles, given the fact that only little work has been done on Hg  
isotopes in the atmosphere. We believe that redistribution of Hg among PBM, GEM  
and RGM occurred at individual emission source (such as coal-fired plant, smelting,  
55 cement plant) could also have caused fractionation of the Hg isotopes in individual  
phases. We assume that these processes may have identical effect on Hg isotopic  
compositions of initial emission (as demonstrated in Sun et al., doi:  
10.1021/es501208a, 2014) and thus would not significantly change with time.  
However, any discussion of such effects could be speculative without firm evidence  
60 or measured data for the processes. Thus, there is immediate need of research on  
isotope fractionation caused by (i) multiple photolytic processes including photolytic  
oxidation and (ii) redistribution of mercury among different phases.

-- In this study, we have to use the simplified assumptions mentioned above and limit  
65 our discussions to the effects of mixing of different sources on the measured data as  
we have characterized the Hg isotope composition for major emission sources. The  
data we collected and the information we currently have could not be used to  
delineate the effects of multiple processes on the characteristics of Hg isotopic

compositions for the PM<sub>2.5</sub>. According to the above discussion (and discussion in the text) and due to the lack of direct evidence and/or experiments on Hg isotope fractionation during atmospheric Hg transformation, we suggest that the contributions from different sources may be the better scenario to explain the seasonal variation of Hg isotopic compositions we measured for the PM<sub>2.5</sub> samples.

-- To accommodate the above comments of this reviewer, we have revised the manuscript in line 498-502 of page 22. Since a new paper published online on Hg isotope fractionation during oxidation by halogen, we discussed also the possible effect of oxidation on Hg isotopes in atmosphere fine particles (line 523-532, page 23).

2) I was also surprised to see that the most extreme Hg isotope signatures (at least for  $\Delta^{199}\text{Hg}$ ) are found for PM<sub>2.5</sub> samples, and not for potential sources (Figure 3). The high  $\Delta^{199}\text{Hg}$  are discussed as deriving from long-range transport, which could make sense although it is not proven. The lowest  $\Delta^{199}\text{Hg}$  signatures are however discussed as an impact of local coal combustion, while coal samples analyzed here do not display such low  $\Delta^{199}\text{Hg}$ .

-- We think the low  $\Delta^{199}\text{Hg}$  data which this reviewer referred to were related to the possible source of biomass burning, which is considered as a source for PM<sub>2.5</sub> in autumn with the lowest  $\Delta^{199}\text{Hg}$  signatures. We agree with this reviewer that the coal burning may not have resulted in such a lower  $\Delta^{199}\text{Hg}$  signature. Please see the session "*Important biomass burning input in autumn*". Another possibility is the influence of elemental Hg oxidation, but given the fact that our observation is largely different from the experiment results and that the oxidation by halogens would not commonly occur in the inland atmosphere boundary layer, the oxidation may not be the dominant controlling factor for seasonal variation of Hg isotopes in these fine particles. Please see our discussion on Hg oxidation effect added in the revised version (line 523-532, page 23).

3) Lines 337-340: The principal component analysis on element concentrations indicates that biomass burning is only a minor source of PM<sub>2.5</sub>-Hg. Later in the discussion (paragraph starting line 365), biomass burning is evaluated as an important

parameter driving PM<sub>2.5</sub>-Hg concentration and isotope signatures, especially in Autumn. Could you comment on these contrasting conclusions?

105

-- We thank this reviewer for pointing out an inaccurate statement in the original text of this paper (Note, Reviewer 3 had the same comment). We have made thorough revision in the revised version of the paper to eliminate such an inaccurate statement. See line 434 to 436 in revised version.

110

-- We agree with this and the third reviewer that, in general, biomass burning is not a main source of Hg emission, especially over the long time period of observation (12 month, for instance). But this contribution may be important in a short period in autumn, during peak days of the biomass burning season. We have to mention here that the isotope data would give more direct evidence for source tracing compared to the principal component analysis (PCA) calculation, as the late was done based only on the relationships between Hg and a limit number of other elements, which have different geochemical behaviors and/or may derive from different sources. The PCA would thus give only an approximate estimation. We modified the text and made appreciate correction to make this clearer. It is very interesting to note that the Hg isotope compositions for biomass burning derived PM<sub>2.5</sub> have unique properties of high EC content (5.9  $\mu\text{g}/\text{m}^3$ ), more negative  $\Delta^{199}\text{Hg}$  (−0.53 ‰) and relatively low Hg content (505 ng/g). It is apparent that, although the contribution of biomass burning to the overall PM<sub>2.5</sub> is not very significant, it is distinguishable with such unique Hg isotope signature and may be important in certain days especially in autumn. This can be further confirmed by high content of EC (and more negative  $\Delta^{199}\text{Hg}$ ) for some autumn samples accompanied with north-bound wind. Previous studies (X. Zheng et al., Sci. China Ser. B, 48, 481-488, doi: 10.1360/042005-15, 2005; M. Zheng et al., Atmos. Environ., 39, 3967-3976, doi: 10.1016/j.atmosenv.2005.03.036, 2005) reported that this source may account for 20 to 60 % of PM<sub>2.5</sub> in Beijing during biomass burning season.

4) Lines 463-468: Here is a discussion about the potential effect of photochemical reduction of Hg. It is true that Hg photoreduction usually induces enrichment in heavy and odd Hg isotopes in the remaining fraction (as observed by Bergquist and Blum, 2007). However, the inverse effect (enrichment in heavy and even Hg isotopes) was

135

observed experimentally in presence of sulfur ligands (Zheng and Hintelmann, 2010).  
Finally, could this explain the Hg isotope variations in PM<sub>2.5</sub>?

140 -- We noticed that a recent study (Zheng and Hintelmann, doi: 10.1021/jp9111348,  
2010) reported negative  $\Delta^{199}\text{Hg}$  values for the remaining fraction of Hg bound on  
sulfur-containing organic matter, which was observed under laboratory conditions.  
In brief, Zheng and Hintelmann (2010) investigated photochemical reduction of Hg(II)  
by two classes of low molecular weight organic compounds. Their results showed  
145 that dissolved cysteine, an S-containing amino acid, slower the reduction of Hg(II)  
compared to serine, a compound having no organic sulfur functional group.  
Moreover, cysteine tends to consume magnetic isotopes ( $^{199}\text{Hg}$  and  $^{201}\text{Hg}$ ) from the  
reactant Hg(II) at relatively faster rates whereas the photoreduction within  
serine-containing system enriched  $^{199}\text{Hg}$  and  $^{201}\text{Hg}$  in the reactant Hg(II). The  
150 overall reaction yields negative  $\Delta^{199}\text{Hg}$  values for the remaining fraction of Hg(II) in  
the cysteine containing system.

-- It is likely that PM<sub>2.5</sub> may contain organic compounds that may have sulfur  
functional groups. However, extrapolation from the cited lab study to field study  
155 (such as this current study) is not appropriate at current stage as the content of organic  
sulfur bound on the PM organic matter was not quantified. It is known that  
inorganic sulfate is the dominant species of sulfur in PM<sub>2.5</sub>, but no prior study  
indicated any organic sulfur present in PM<sub>2.5</sub>. Without firm evidence, however,  
discussion of these processes and their effects on Hg isotope composition on the PM<sub>2.5</sub>  
160 samples would be speculative and inconclusive.

5) Regarding the objective of the study, which was to evaluate “the effectiveness of  
the Hg isotope technique for tracking the sources of the PM<sub>2.5</sub>-Hg”, would you say  
that Hg isotope signatures were necessary? It seems to me that the main conclusions  
165 are made based on EC and Zn/Al ratio (shown in Figure 7). If only Hg concentrations  
and isotope ratios were known, would you be able to address PM<sub>2.5</sub>-Hg sources?

-- Our answer to the above question is yes for certain situations and no for others.  
Our study could provide clear evidence that PM<sub>2.5</sub>-Hg derived from biomass burning  
170 is distinguishable based on the Hg isotopic signatures. PM<sub>2.5</sub>-Hg derived from other

sources could not be apportioned readily with Hg isotope data alone at this stage. This is why other data such as EC and elemental data are added for better source apportionment of PM<sub>2.5</sub>-Hg. This stresses also the importance of further study on Hg isotope systematics in atmosphere.

175

-- We believe that qualitative source apportionment could be much improved with more studies in this area. As we mentioned in the introduction, isotopes of Hg (and also other metals) are rarely used for tracing the sources of Hg in atmospheric aerosols (actually this is the third study) and our primary results clearly demonstrated the usefulness of isotope approach. We think that an enormous effort and much more studies are needed to ultimately establish a complete method that could quantitatively distinguish the source of Hg and its host PM<sub>2.5</sub>. As stated above, the Hg isotope compositions in PM<sub>2.5</sub> are results of mixing, reaction and phase distribution. Given the fact that there was only little done on Hg isotopes in atmospheric particles and Hg isotopic fractionation during atmospheric processes, we attempted to characterize the Hg isotope signatures of different sources with strong support of geochemical approaches such as elemental ratios and EC content in PM<sub>2.5</sub> samples. Based on our study, the sources of Hg and PM<sub>2.5</sub> could be assessed qualitatively from both Hg isotope data and elemental analysis. We want to point out that this first Hg isotope study has largely improved our knowledge on particulate Hg and its origin and behavior in atmospheric fine particles in Beijing. Further research on Hg isotope composition may certainly help to achieve more precise apportionment. Further studies are needed to quantify source-specific Hg isotope signatures and to characterize the process-specific isotope fractionation. This study is indeed a first step toward understanding of complex systems using the Hg isotope approach.

185

190

195

Minor comment:

200 On line 70, The range given for GEM  $\delta^{202}\text{Hg}$  (-3.88 to 0.43 ‰) is incorrect. Demers et al. (2015) found values up to 1.4 ‰.

-- Corrected, thanks.

205    **2. Anonymous Referee #3**

Received and published: 4 July 2016

210    Atmosphere Hg is considered to be the main source of mercury deposition into  
terrestrial ecosystem. Hence it is necessary to understand the primary mercury sources  
in the atmosphere and how they change with seasons. The manuscript uses multiple  
proxies to understand the changing Hg sources in Beijing air. Using multi proxy is  
always a stronger tool as compared to using solely concentration based studies. The  
manuscript is well written and well organized. However, I have two major issues with  
215    the argument:

1). The authors mention in the supplementary section (lines 70-72) from factor  
analysis results “Low loading of Hg in factors F-3 and F-4 suggest traffic emission  
and biomass burning sources may be not the major contributors for PM 2.5 bound Hg.  
220    “However from isotopic (negative  $\Delta^{199}\text{Hg}$ ) signature biomass burning emission Hg  
was considered a major source in Autumn. The contradictory statements derived from  
two different proxies are confusing. This is a major drawback of the manuscript that  
needs to be fixed.

225    -- We thank this reviewer for his/her comment which is very similar to the comment  
made by the second reviewer on this issue. We have made thorough revision in the  
revised version of the paper to eliminate such an inaccurate statement.

-- Please refer to our above response to reviewer #2 on the same issue. In fact, the  
230    principal component analysis (PCA) calculation was done based only on the  
relationships between Hg and a limit number of other elements, which have different  
geochemical behaviors and/or may derive from different sources from Hg, and would  
thus give only an approximate estimation. Compared to PCA, the isotope approach  
would give more direct (even reliable) evidence for source tracing, as demonstrated  
235    by many previous studies on source tracing in variable environments (Chen et al., doi:  
10.1021/es800725z, 2008, Chen et al., doi: 10.1016/j.gca.2012.05.005, 2012; Eiler et  
al., doi: 10.1016/j.chemgeo.2014.02.006, 2014; Wiederhold, doi: 10.1021/es504683e,  
2015). We modified the text and made appreciate correction to make this clearer.

240 Please see line 378 to 385 on page 17 and line 434 to 436 on page 19 in revised version.

2). I am not sure whether enrichment factor (EF) can be used for PBM as it is only a small fraction of total atmospheric Hg. Hence the PBM EF will always be underestimated as compared to atmospheric Hg EF.

245 -- EF is a simple but useful approach for evaluating the enrichment/depletion pattern of an element compared to a reference. The fact that it is calculated by a double normalization relative to a reference reservoir (ideally the background) and using an inactive element can cancel out the dilution effect by major phases, and thus give  
250 more reliable information compared to only content or elemental ratio data. This is why it is widely employed in previously environmental studies (Milford and Davidson, doi: 10.1080/00022470.1985.10466027, 1985; Gao et al., doi: 10.1016/S1352-2310(01)00381-8, 2002; Waheed et al., doi: 10.1080/02786826.2010.528079, 2011; Chen et al., doi: 10.1002/2014GC005516, 2014; Mbengue et al., doi: 10.1016/j.atmosres.2013.08.010, 2014; Lin et al., doi: 10.1016/j.envpol.2015.07.044, 2016), for evaluating the pollution level of a component, especially for solid geological materials. Given the fact that not too much work has been done to investigate the enrichment/depletion of heavy metals in fine atmosphere particles (as seen from the limited data available in literature), it is  
260 necessary to carry out such basic research while studying the atmospheric pollution and the related health threat, especially in the polluted region such as Beijing where heavy metals are rarely studied. As demonstrated by the EFs calculation in this study, many toxic metals in our PM<sub>2.5</sub> samples processed very high EF values (up to 20,869), implying the serious pollution fact and emphasizing the importance of  
265 studying toxic metals such as Hg (and other heavy metals) in atmospheric particles while accessing the potential threat of hazes on human health. As such, EF calculation is a (maybe not the best) useful approach for evaluating the pollution level of a toxic element in a specific environment at least up to now. According to its calculation, the choice of reference is very important. Though the fine particles from  
270 natural background reservoir (such as Gobi dessert) would be more appreciable for such normalization, the lack of Hg content data (again due to limited work) renders it impossible to use them as a reference. We thus choose the Up Continental Crust



(UCC) as a reference in this study, unless another more appreciable reference exists.

275 -- In fact, the EF calculation is done based on the normalization to a certain reference  
(solid or liquid phase), it does not describe the distribution of elements amongst  
different phases (air, water, particles...), nor the proportion of one phase relative to  
the total. For example, EF calculated for river sediments does not consider the  
elemental concentrations in the overlying water column. Here the EF values  
280 calculated for PM<sub>2.5</sub> do not include any information of Hg in the gaseous phase.

Minor issues:

1). There is a recent paper on PBM Hg isotopes in Elementa Special Issue by Das et  
285 al., (Mercury isotopes of atmospheric particle bound mercury for source  
apportionment study in urban Kolkata, India), it will be nice to see how the Hg  
isotope results compared from India and China.

-- Thanks. We have cited this paper in the revised version of the paper, and have  
290 briefly compared our results to those of this publication.

-- See revised version on line 290-292 "*Three previous studies reported negative  
 $\delta^{202}\text{Hg}$  (from  $-3.48\text{‰}$  to  $-0.12\text{‰}$ ) but significantly positive  $\Delta^{199}\text{Hg}$  (from  $-0.31\text{‰}$   
to  $1.36\text{‰}$ ) for atmospheric particles (Rolison et al., 2013; Huang et al., 2015; Das et  
295 al., 2016).*" and on line 364-367 "*Though the anthropogenic samples collected in this  
study could not cover the whole spectrum of anthropogenic contributions, previous  
studies reported similar  $\delta^{202}\text{Hg}$  range (from  $-3.48\text{‰}$  to  $0.77\text{‰}$ ) for potential  
source materials worldwide (Biswas et al., 2008; Estrade et al., 2011; Sun et al., 2013;  
Sun et al., 2014; Yin et al., 2014; Wang et al., 2015b; Das et al., 2016)*".

300

2). Line 455- Type "Lank". Should be lack.

-- We have deleted this sentence.

305

**3. Jan G. Wiederhold (Referee)** [jan.wiederhold@univie.ac.at](mailto:jan.wiederhold@univie.ac.at)

Received and published: 13 July 2016

Reviewer: Jan Wiederhold (University of Vienna, Austria)

This manuscript presents Hg isotope data from atmospheric particles (PM<sub>2.5</sub>) collected over different seasons in Beijing (China). Together with additional geochemical (OC/EC, element concentrations) and meteorological data, the authors try to explain the observed seasonal Hg isotope variations in the particles by varying contribution of different sources. The Hg isotope compositions of potential source materials (soils, industrial waste materials, coals etc.) were also measured and compared with the values of the collected PM<sub>2.5</sub> particles. The topic of the study is very interesting and novel and it lies within the scope of ACP. The manuscript presents an impressive dataset and the quality of the analytical data is high. I congratulate the authors to their interesting study which has the potential to become an important landmark study for Hg isotope signatures in urban PBM. However, I believe that substantial revisions to the manuscript are necessary prior to a possible publication to provide missing information, to correct mistakes, to consider additional relevant publications, and to revise erroneous concepts and interpretations. Overall, I recommend major revisions with additional review. In the following, I will first highlight some general comments before providing a list of line comments referring to individual sections of the manuscript.

-- We greatly thank Dr. Wiederhold for his very detailed and constructive comments and suggestions on the original version of this paper. We have carefully revised the paper accordingly. There is no doubt that his comments and suggestions have made much improved quality of the work and enhanced readability of the paper. We have specifically acknowledged him in the Acknowledgement section of this paper.

My first general comment refers to the important difference between mass-based and volume-based concentration data for atmospheric particles. The authors mostly discuss volume-based concentrations, but I believe that it would be more appropriate to report and consider mass-based concentrations in most parts of the results and

discussion section. As further discussed below, some of the discussed correlations seem obvious to me (samples with more PM<sub>2.5</sub> will of course also contain higher volume based element contents) and I am rather surprised that some of these correlations (e.g., Fig 4a) are not better (suggesting significant differences in mass-based concentrations which should be discussed). I suggest starting with a discussion of the seasonal differences in the amount of PM<sub>2.5</sub> and then in the following to report and compare only mass-based concentrations values, except when element fluxes are discussed. Please see line comments below for specific examples.

-- We agree with the reviewer that mass-based concentration and volumetric concentration are two basic units for quantifying the contents of specific constituents including isotope compositions in natural samples such as soils, sediments, air, water, and suspended solids. Both units are very popular in atmospheric sciences partly because the air quality standards are in volume based concentration whereas mass-law based reaction processes (such as chemical reaction kinetics) require either mass-based unit or volumetric concentration specified at constant temperature and pressure. In other words, both units are interchangeable in a paper dealing with air pollutants and particulate matter (Schleicher et al., *Chemie der Erde - Geochemistry*, 73, 51-60, doi: 10.1016/j.chemer.2012.11.006, 2013; Mbengue et al., *Atmos. Res.*, 135, 35-47, doi: 10.1016/j.atmosres.2013.08.010, 2014; Schleicher et al., *Atmos. Environ.*, 109, 251-261, doi: 10.1016/j.atmosenv.2015.03.018, 2015; Lin et al., *Environ. Pollut.*, 208, 284-293, doi: 10.1016/j.envpol.2015.07.044, 2016). Indeed, the volume-based concentration units are widely used in the PM literatures (e.g., Gao et al., *Atmos. Envi.*, 36, 1077–1086, doi:10.1016/S1352-2310(01)00381-8, 2002; Tao et al., *Atmos. Res.*, 135–136, 48–58, doi:10.1016/j.atmosres.2013.08.015, 2014; Visser et al., *Atmos. Chem. Phys.*, 15, 2367–2386, doi:10.5194/acp-15-2367-2015; Das et al., *Elementa*, doi:10.12952/journal.elementa.000098, 2016).

-- In this paper we used both units for reasons described above. It should be pointed out that volumetric concentration is better for source apportionment of air pollutants including PM<sub>2.5</sub>. For example, mixing of binary system yields a straight line for target components when volumetric concentration unit is used; however, the same process results in a curve when mass based concentration unit is used for PM<sub>2.5</sub>. In other words, this reviewer was right that the same correlations obtained in this study

375 may be different when the two different units of concentration are used; but the  
correlations established have different effectiveness as an indicator for sources.  
Good linear relationships in volumetric concentration plots may indicate mixing of  
two dominant sources, but the same datasets plotted using mass-based concentration  
would not provide such clear indication of mixing.

380

Secondly, I believe that there are still more details needed about some important  
aspects of the methodological procedures. I acknowledge that the authors have added  
some more information on the combustion of the filters in response to my previous  
quick access review. However, I still miss the crucial information how the PM<sub>2.5</sub>  
385 content was determined (e.g., weighing of filters after drying/conditioning? upper  
particle size cutoff?) which represents the basis for all mass-based concentrations. In  
addition, it is not described how the PM<sub>2.5</sub> samples were removed from the filters for  
the performed acid digests or whether a representative aliquot of the filters was cut  
out prior to combustion and used for the acid digests (which I guess was most likely  
390 the chosen approach).

-- We appreciate the reviewer for his above comments and suggestions. We have  
added more information for several methodological procedures which are largely  
standard in the atmospheric sciences.

395

Thirdly, I am very skeptical whether the performed calculations of enrichment factors  
using Al and the Upper Continental Crust (UCC) as reference points are really  
applicable to PM<sub>2.5</sub> particles and also most of the source materials. The Al  
concentrations in the PM<sub>2.5</sub> particles were very low (max. 15 ppm) suggesting that  
400 aluminosilicate minerals did not represent a major component of the particles. This  
doesn't exclude the presence of other mineral phases (such as carbonates from loess  
particles, Ca/Al >1 in all PM<sub>2.5</sub> samples), but also indicates that organic matter  
probably constituted a major fraction of the PM<sub>2.5</sub> particles. As further detailed  
below, I suggest re-thinking the performed calculation of enrichment factors.

405

-- We agree with this reviewer that Al and the UCC as reference points may not be  
ideal for performing calculation of enrichment factors for atmospheric PM<sub>2.5</sub>. There  
is a need of using source-specific elemental compositions for such data plotting or

calculation. However, without a more appropriate reference (such as Gobi Desert  
410 fine particles) or method available, we still choose to use the enrichment factor (EF)  
approach in this study because it is an established method that is simple and useful,  
and even reliable for evaluating the enrichment/depletion patterns of certain  
component and was widely used in the literature for similar pollution aspects. Please  
refer to our above response to the reviewer #3's second major comment on the similar  
415 issue. We think that Al is well adapted to this normalization as it is usually not of  
anthropogenic origin and it is not readily modified by secondary processes in the  
atmosphere. Other element such as Th and certain REEs may be also used for such  
propose. The EF calculation using Al as a reference has been widely used in  
atmospheric sciences (Milford and Davidson, *J. Air Pollut. Control Assoc.*, 35:12,  
420 1249-1260, doi: 10.1080/00022470.1985.10466027, 1985; Gao et al., *Atmos.*  
*Environ.*, 36, 1077–1086, doi:10.1016/S1352-2310(01)00381-8, 2002; Waheed et al.,  
*Aerosol Sci. Technol.*, 45, 163-171, doi: 10.1080/02786826.2010.528079, 2011;  
Mbengue et al., *Atmos. Res.*, 135, 35-47, doi: 10.1016/j.atmosres.2013.08.010, 2014;  
Lin et al., *Environ. Pollut.*, 208, 284-293, doi: 10.1016/j.envpol.2015.07.044, 2016).

425  
My next general comment refers to the fact that some recently published studies were  
not considered by the authors. Most importantly, the study by Das et al. (2016,  
*Elementa*, doi:10.12952/journal.elementa.000098) reporting Hg isotope signatures of  
urban PBM from India should be considered and the data compared with the urban  
430 PBM samples reported here. In addition, in the context of Hg isotopes in GEM, the  
authors should consider the recent papers by Fu et al. (2016, *ES&T*,  
doi:10.1021/acs.est.6b00033) and Enrico et al. (2016, *ES&T*,  
doi:10.1021/acs.est.5b06058).

435 -- We have updated these references, in addition, the newly published paper on Hg  
oxidation (Sun et al., doi: 10.1021/acs.est.6b01668, 2016) was also updated. We  
have made appropriate revisions for the text according to the new references.

Moreover, I have the impression that some of the interpretations and conclusions  
440 presented in the manuscript are not sufficiently supported by the presented data and  
arguments (e.g., isotopic evidence for local anthropogenic sources). The observation  
that the Hg isotope signatures of PM<sub>2.5</sub> samples are “consistent” with signatures of

potential anthropogenic sources does not represent sufficient proof as long as it is not demonstrated that other potential Hg sources (natural or non-local anthropogenic) are isotopically distinct. As further detailed below, I suggest re-wording and carefully  
445 toning down some of the interpretations and conclusions.

-- We have made all necessary and appropriate revisions in the revised version of the paper to carefully tune down the interpretations and conclusions. Again, as indicated  
450 by our data set and mentioned by the reviewer, this is one of the first few studies on Hg isotopes in atmospheric fine particles, and limited by the actual data (ours and of the literature), some of our conclusions and interpretations have to remain speculative and inconclusive. Anyway, as mentioned below by the reviewer, our study demonstrates clearly the usefulness of Hg isotope approach for identifying the sources  
455 of Hg in atmosphere fine particles and emphasizes the importance of further research on such issue.

Furthermore, I believe that the authors should try to clarify and illustrate in a more detailed manner which new conclusions about atmospheric Hg cycling in urban  
460 environments can be drawn based on the presented Hg isotope data as opposed to previous studies investigating only elemental concentrations. Obviously, many applications of metal isotope ratios in environmental studies are still in an exploratory stage, but I believe that it is important to demonstrate the added value of isotopic data in comparison to more traditional study approaches.

465 -- We appreciate the reviewer for his suggestions. We believe that discussion of cycling of Hg in the atmosphere requires more data on the amount and isotopic composition) of Hg emitted in the urban environment, the speciation and the relative isotopic fractionation of the emitted Hg in terms of oxidation states ( $\text{Hg}^0$  versus and  
470  $\text{Hg}^{2+}$ ) and gaseous versus particulate forms, and the equally detailed information on Hg and its isotope signature in the background atmosphere. These datasets are not available in our study nor in the literature at the local scale. We feel it is not appropriate for us to over extrapolate the conclusions of this study to the topic of cycling Hg in the studied area. Extensive quantification and characterization of the  
475 relevant parameters that aimed at the Hg cycling are apparently needed in our future study.

Finally, there are many problems with tense forms in the manuscript. I tried to list many of them in my line comments below, but I probably missed some. In general, I suggest reporting all study-specific findings in past tense, in contrast to generally accepted facts which should be reported in present tense. However, statements referring to figures and tables in the manuscript should be in present tense (e.g., “data are shown” instead of “data were shown”). Please check the appropriate use of tense forms throughout the manuscript and/or seek advice from a native English speaker (which I am not).

-- We appreciate this reviewer for the above comments. We have made substantial revision in the current version of the paper.

490

Line comments:

L28: maybe better “more positive” instead of “significant positive”

495 -- Changed.

L36: delete “biological” (is there non-biological toxicity?)

-- Deleted.

500

L38: Here and in many other places, please use present tense for generally accepted facts, whereas study-specific findings should be presented in past tense. Here: “has” instead of “had”.

505 -- Changed accordingly.

L39: replace “including” with “:”

-- Changed.

510

L42: “is assumed to be” instead of “can be”

-- Changed.

515 L51: I suggest citing review papers/chapters on Hg isotopes (Blum et al., Hintelmann et al., Yin et al., : : :) here instead of only some selected studies which do not give the full picture. You could potentially add a second sentence here referring specifically to previous studies on atmospheric samples, which would cover some of the listed papers but more would need to be added.

520

-- We have cited the papers listed above and made appropriate changes in the revised version of the paper. Please see the revised version: “*Mercury has seven stable isotopes (<sup>196</sup>Hg, <sup>198</sup>Hg, <sup>199</sup>Hg, <sup>200</sup>Hg, <sup>201</sup>Hg, <sup>202</sup>Hg and <sup>204</sup>Hg) and its isotopic ratios in the nature have attracted much interest in recent years (Yin et al., 2010; Hintelmann and Zheng, 2012; Blum et al., 2014; Cai and Chen, 2016)*”.

525

L53: The term “mainstream” is not clear in this context. Maybe replace with “primarily”?

530 -- Replaced.

L57: I think that there would be better citations for NVE (e.g., Schauble, 2007, GCA, doi:10.1016/j.gca.2007.02.004) and MIE (e.g., Buchachenko, 2009, Russ. Chem. Rev., doi:10.1070/RC2009v078n04ABEH003904 or 2013, J.Phys.Chem. B, doi:10.1021/jp308727w) of Hg isotopes.

535

-- We have cited the papers listed above in the revised version of the paper. Please see the revised version: “*The nuclear volume effect (NVE) (Schauble, 2007) and magnetic isotope effect (MIE) (Buchachenko, 2009) are thought to be the main causes for odd-MIF (Bergquist and Blum, 2007; Gratz et al., 2010; Wiederhold et al., 2010; Sonke, 2011; Chen et al., 2012; Ghosh et al., 2013; Eiler et al., 2014)*”.

540

L58: I think that more recent studies (both theoretical and experimental) have agreed on a slope for NVE of about 1.6. The statement “>1.5” also includes the higher



545 theoretical values of  $>2$  postulated in earlier papers (e.g., Estrade et al., 2009) which  
have no experimental support and were based on older compilations of nuclear charge  
radii which have been updated recently. Please see discussions in Wiederhold et al.  
(2010, ES&T, doi: 10.1021/es100205t), Ghosh et al. (2013, Chem. Geol.,  
doi:10.1016/j.chemgeo.2012.01.008) or Eiler et al. (2014, Chem. Geol.,  
550 doi:10.1016/j.chemgeo.2014.02.006) on this topic.

-- We have made appropriate changes in the revised version of the paper. Please see  
the revised version: *“Theoretical and experimental data suggested a  $\Delta^{199}\text{Hg}/\Delta^{201}\text{Hg}$   
ratio about 1.6 for NVE (Zheng and Hintelmann, 2009, 2010), and a  $\Delta^{199}\text{Hg}/\Delta^{201}\text{Hg}$   
555 ratio mostly between 1.0 and 1.3 for MIE as a result of photolytic reductions under  
aquatic (and atmospheric) conditions (Zheng and Hintelmann, 2009; Malinovsky et  
al., 2010; Wiederhold et al., 2010; Zheng and Hintelmann, 2010a; Sonke, 2011;  
Ghosh et al., 2013; Eiler et al., 2014).”*

560 L59: “a” instead of “the”

-- Changed.

L59: I suggest writing “mostly between 1.0 and 1.3” as slope for the MIE and, in  
565 addition, referring to more recent papers or reviews that discuss these numbers.

-- We have made appropriate changes in the revised version of the paper. Please see  
the revised version: *“Theoretical and experimental data suggested a  $\Delta^{199}\text{Hg}/\Delta^{201}\text{Hg}$   
ratio about 1.6 for NVE (Zheng and Hintelmann, 2009, 2010), and a  $\Delta^{199}\text{Hg}/\Delta^{201}\text{Hg}$   
570 ratio mostly between 1.0 and 1.3 for MIE as a result of photolytic reductions under  
aquatic (and atmospheric) conditions (Zheng and Hintelmann, 2009; Malinovsky et  
al., 2010; Wiederhold et al., 2010; Zheng and Hintelmann, 2010a; Sonke, 2011;  
Ghosh et al., 2013; Eiler et al., 2014).”*

575 L68: This list is not complete anymore due to recent publications (e.g., Das et al.,  
2016, Fu et al., 2016, Enrico et al., 2016, see details above) and also some older ones  
are missing here (e.g., Zambardi et al., 2009; Demers et al., 2013).

-- We have added the above references in the revised version of the paper. Please  
580 see the revised version: “Up to now, several studies reported Hg isotopic  
compositions in atmospheric samples (Zambardi et al., 2009; Gratz et al., 2010; Chen  
et al., 2012; Sherman et al., 2012; Demers et al., 2013; Rolison et al., 2013; Fu et al.,  
2014; Demers et al., 2015; Sherman et al., 2015; Yuan et al., 2015; Das et al., 2016;  
Enrico et al., 2016; Fu et al., 2016)”.

585

L70: Check more recent papers for updated isotopic ranges of GEM.

-- We have made appropriate changes in the revised version of the paper. Please see  
the revised version: “These studies reported large variations of  $\Delta^{199}\text{Hg}$  and  $\delta^{202}\text{Hg}$   
590 values for GEM (ranged from  $-0.41\text{‰}$  to  $0.06\text{‰}$  for  $\Delta^{199}\text{Hg}$ , and from  $-3.88\text{‰}$  to  
 $1.40\text{‰}$  for  $\delta^{202}\text{Hg}$ , respectively) (Zambardi et al., 2009; Gratz et al., 2010; Sherman  
et al., 2010; Rolison et al., 2013; Yin et al., 2013; Das et al., 2016; Enrico et al., 2016;  
Fu et al., 2016)”.

595 L74: Why “More importantly,”? I suggest replacing this with “In addition,”.

-- Changed.

L84: This would be the place to refer to and describe the findings of Das et al. (2016,  
600 see above) on Hg isotopes in PBM samples from an urban environment in India.

-- We have made appropriate change in the revised version of the paper.

L89: add “metal” after “non-ferrous” (also in line 280)

605

-- Added.

L93: “carriers” instead of “carrier”

610 -- Changed.

L93/94: I suggest changing the sentence to “If PM2.5 is emitted: : :”.

-- Changed.

615

L99: “coupled” instead of “coupling”

-- Changed.

620 L113: Here and in the following: In contrast to the names of months, the names of seasons are usually not capitalized (e.g., “summer” instead of “Summer”).

-- We have made all necessary changes in the revised version of the paper.

625 L115: delete the second “the”

-- Deleted.

L122: “is” instead of “was”

630

-- Changed.

L125: I suggest stating here the air volume in m<sup>3</sup> which is represented by one sample (24 h x flow rate). Did you weigh the filters before and after use to quantify the PM fraction? If yes, did you have to dry/condition them to correct for humidity differences? What is the upper cutoff of the collected particle fraction, i.e. did you had a pre-filter to exclude larger particles? You used very high flow rates, so bigger particles may well have entered the sampling system. In conclusion, please provide more details about the PM<sub>2.5</sub> sampling procedure.

640

-- We have added detail information in the revised version of the paper.

-- We followed a standard procedure for PM sampling. The PM<sub>2.5</sub> samples were collected using a Tisch Environmental PM<sub>2.5</sub> high volume air sampler, which collects particles at a flow rate of 1.0 m<sup>3</sup> min<sup>-1</sup> through a PM<sub>2.5</sub> size selective inlet. As the particles travel through the size selective inlet the larger particles are trapped inside of

645

the inlet while the smaller-size ( $PM_{2.5}$ ) particles continue to travel through the  $PM_{2.5}$  inlet and are collected on a pre-combusted (450 °C for 6 hrs) quartz fiber filter (Pallflex 2500 QAT-UP, 20 cm × 25 cm, Pallflex Product Co., USA). The mass of  $PM_{2.5}$  on each filter was measured using a gravimetric method by the mass difference before and after sampling. The filters were conditioned in a chamber with a relative humidity of about 48% and a temperature of  $20 \pm 2$  °C for about 24 h before and after sampling.

L126: Please specify what negligible means in this context (e.g., <1% of Hg in samples?).

-- Revised. Now it reads *“A field blank was also collected during sampling and the value (< 0.2 ng of Hg, n = 6) was negligible (< 2 %) compared to the total Hg mass contained in the  $PM_{2.5}$  samples”*.

L138: Please add “samples” after “topsoil”. Moreover, I would be interested to learn more about these “topsoil samples”. Are these “organic surface layers” (e.g., litter, Ohorizons) or “mineral soil horizons” (e.g., Ah horizons). In simplified terms, are these samples dominantly organic or mineral material?

-- Revised. Please see the revised version: *“four topsoil samples (surface horizon: organics mixed with mineral matter, these samples are not natural soil on typical soil profiles) from the center city of Beijing (Olympic Park, Beihai Park, the Winter Palace and Renmin University of China (RUC)), two dust samples from RUC (one building roof dust and one road dust)”*.

L140: How did you collect the “total suspended particle” sample and which size fraction does it represent?

-- Revised: *“The sampling of total suspended particle (TSP) was carried out using a made in house low volume (about  $1.8 \text{ m}^3 \text{ h}^{-1}$ ) air sampler equipped with a TSP inlet, and a pre-cleaned mixed fiber filter (47 mm) was used for the TSP low-volume inlets. Please see line 158 to 160 in revised version”*.

L143: delete “the”

-- Deleted.

685 L148: delete “the”

-- Deleted.

L151: Why did you use 20% SnCl<sub>2</sub> for concentration measurements?

690

-- A 0.5-mL of 20% SnCl<sub>2</sub> solution was introduced in a 20-mL purge solution (Hg free) to convert Hg<sup>2+</sup> to Hg<sup>0</sup> after the sample solutions added, then the Hg<sup>0</sup> was purged out by N<sub>2</sub> (Hg free) and trapped on gold-coated beads for Hg concentration measurements.

695

L56: “J. Wiederhold” did not provide any of these two standards. Joel Blum provides the UM-Almaden standard and NIST-3133 is available from NIST. I (Jan Wiederhold) only provide the “ETH Fluka” secondary standard which is mentioned in line 160, but which was not used in this study.

700

-- Sorry for making such an inaccurate statement. We have made appropriate changes in the revised version of the paper.

L162: add “a” after “via”

705

-- Added.

L165: “quartz” instead of “quarts” (also in line 168)

710 -- Changed.

L169: I suggest adding “precleaned” before “at 500C”. I assume that you didn’t do the capping at 500C: : :

715 -- Added.

L170: I suggest clarifying this to “The sample tube was then placed into the large quartz tube of the furnace”.

720 -- Changed.

L171: Do you mean “routine” instead of “route”?

-- Yes, it is now changed.

725

L173: This doesn’t make sense. If there was indeed Hg(0) in the trap solutions which was not oxidized by the HNO<sub>3</sub>, it would have been purged out during the combustion procedure. Thus, if you added BrCl afterwards, it could only serve the purpose of stabilizing the Hg(II) in solution, rather than oxidizing it.

730

-- Agree. We have now changed the sentence to “*An aliquot (50 μL) of 0.2 M BrCl was added to the above trapping solution to stabilize the Hg<sup>2+</sup>*”.

L174: add “of” before “about”

735

-- Changed.

L185: Did not you also use Tl for mass-bias correction in addition to standard-bracketing?

740

-- Yes, we added Tl for mass-bias correction. We have now added delineation of this procedure. Please see the revised version: “*The instrumental mass bias was double corrected by both internal standard NIST SRM 997 Tl and by sample-standard bracketing (SSB) using international standards NIST SRM 3133 Hg*”.

745

L189: Did you also measure <sup>204</sup>Hg? The previous method paper (Huang et al., 2015, JAAS) included data for <sup>204</sup> and if you have these data, please add them to the manuscript. As you certainly know, data for <sup>204</sup> in parallel to <sup>200</sup> might be helpful to

better understand even-mass MIF.

750

-- Yes, we measured  $^{204}\text{Hg}$ . Those data do not provide more information than  $^{200}\text{Hg}$ , thus we would like to add the data of  $^{204}\text{Hg}$  in SI.

L195: Please make sure to add permil signs to all values and their errors (here after  
755 “0.13”).

-- Added.

L196: How did you calculate the precision of the NIST data (bracketed against itself?  
760 with samples in between or not?).

-- Yes, we computed the NIST data using the bracketing method as briefed the reviewer’s question.

765 L197: Here and in the following (e.g., L202): Please add permil signs to all isotope results. The permil sign is not a unit (such as mg/L) but a factor and the delta value is not correctly reported if you don’t add the permil sign.

-- Added.

770

L211: How do you know that the recoveries for the samples were in the acceptable range? As far as I can tell, you didn’t know the Hg concentrations of your PM2.5 samples prior to the combustion. If you saved a part of the filter and performed an acid digest on it, then please provide the necessary details. Otherwise, I don’t think  
775 that you can make a statement on recovery of your PM2.5 samples during the combustion step.

-- The reviewer is right that we cannot provide the recoveries for Hg bound on the PM<sub>2.5</sub> samples. We have made necessary corrections to eliminate such incorrect  
780 description. Please see line 193 to 195 on page 9 and line 232 to 233 on page 11 in revised version.

L212: On which sample material did you conduct the OC/EC analysis? Did you have to remove the particles from the filter prior to analysis? If yes, how was this achieved?  
785 If there was inorganic carbon in the samples (e.g., carbonate from loess particles), would this interfere with the OC/EC analysis?

-- There is a standard procedure for analyzing EC/OC ratio. This procedure is often used in atmosphere chemistry field based on an assumption that PM samples,  
790 particularly PM<sub>2.5</sub>, may contain inorganic carbon that is either negligible or not decomposed at the oxidation temperature (800°C) (see published paper by Chow et al., Journal of Geophysical Research-Atmospheres, doi: 10.1029/2001JD000574, 2002). In this study, we used this procedure and the same assumption for quantifying EC/OC ratio. In brief, a 0.5 cm<sup>2</sup> punch from each samples was analyzed for OC and EC  
795 with a Desert Research Institute (DRI) Model 2001 Thermal/Optical Carbon Analyzer (Atmoslytic Inc., Calabasas, CA, USA) for eight carbon fractions following the IMPROVE (Interagency Monitoring of Protected Visual Environments) thermal/optical reflectance (TOR) protocol. The eight well-defined fractions of carbon are four organic carbon fractions (OC1, OC2, OC3, and OC4 at 120°C, 250°C, 800 450°C, and 550°C, respectively, in a He atmosphere), a pyrolyzed carbon fraction (OP, determined when a reflected laser light attained its original intensity after O<sub>2</sub> was added to the analysis atmosphere), and three elemental carbon fractions (EC1, EC2, and EC3 at 550°C, 700°C, and 800°C, respectively, in a 2% O<sub>2</sub>/98% He atmosphere). IMPROVE OC is defined as OC1+OC2+OC3+OC4+OP and EC is defined as  
805 EC1+EC2+EC3-OP.

L217: Please explain how you digested the PM<sub>2.5</sub> samples. Did you cut out a part of the filter prior to combustion and digested it? If yes, did the HF dissolve the whole quartz fiber filter?

810 -- We used the HF digestion method to dissolve both PM<sub>2.5</sub> samples and the quartz filter without combustion. We used a 1.5 cm<sup>2</sup> punch from each samples and dissolved it completely with HF. We didn't observe any solid residue in the final solution after HF treatment. Please see the revised version in line 241 to 242.

815 L218: I suggest replacing “run out” with “exhausted”.



-- Changed.

820 L224: “are” instead of “were”.

-- Changed.

L225: I don’t think that you explained in the methods section how you quantified the  
825 PM<sub>2.5</sub> contents of your samples.

-- The reviewer was right that we didn’t explain the method for quantifying the PM<sub>2.5</sub>  
contents of our samples. The contents were computed based on the flowrate of air  
samples, the time period of sampling, and the mass of the PM<sub>2.5</sub> collected on the filter  
830 paper. This is a standard procedure so that we didn’t describe it in the text.

L227: If you discuss carbon concentrations of the PM<sub>2.5</sub> samples, I would discuss  
primarily the mass-based values. In my view (although I am certainly not an expert in  
this field), I suggest that you first discuss the variations in the amount of PM<sub>2.5</sub> (i.e.  
835 total mass of particles on the filter after 24 h sampling) and its seasonal variations. In  
the following, I would then primarily discuss mass-based concentrations to describe  
qualitative differences between the PM<sub>2.5</sub> samples and only come back to volumetric  
values if you want to discuss total fluxes of Hg or other constituents.

840 -- We appreciate the reviewer for the suggestions. We have replied to the reviewer  
in the general comments provided above. Here are the responses copied from our  
responses to general comments.

-- We agree with the reviewer that mass-based concentration and volumetric  
845 concentration are described from different expressions of contaminant. Both units  
are very popular in atmospheric sciences partly because the air quality standards are in  
volume based concentration whereas mass-law based reaction processes (such as  
chemical reaction kinetics) require either mass-based unit or volumetric concentration  
specified at constant temperature and pressure. It should be pointed out volumetric  
850 concentration is better for source apportionment for air pollutants including PM<sub>2.5</sub>.

For example, mixing of binary system yields a straight line for target components when volumetric concentration unit is used; however, the same process results in a curve when mass based concentration unit is used for PM<sub>2.5</sub>. In this paper we used both units interchangeably in this paper dealing with air pollutants and particulate matter.

L228-232: Based on these values, I can't tell whether the described variations were due to the fact that the OC/EC contents of the particles varied or only the amount of particles (or both).

-- We used both mass-based and volume-based concentrations to describe the OC and EC in this section and also in the discussion section.

L234: This value means that the winter samples consisted of about 17 mass-% OC which probably means that about one third of the PM<sub>2.5</sub> sample mass consisted of organic matter (using the crude approximation OM ~ 2xOC). Some samples maybe consisted of up to 50% of organic matter. This needs to be considered in the interpretation of Hg content and other elemental concentrations and strongly questions the normalization to "upper continental crust" values for rocks (see further comments below).

-- We agree with this reviewer that OC content is significantly higher in winter PM<sub>2.5</sub> samples with a range of 108 to 240 mg/g (Table S1) than those in other seasons. High OC contents in PM<sub>2.5</sub> are generally reported in previous studies (Lin et al., J. Geophysical Research, doi: 10.1029/2008JD010902, 2009), particularly higher in urban area with heavy atmospheric pollution. Indeed, we have considered the relationship between carbon and Hg concentrations in winter, as we described in line 403 to 407 on page 18 that "*High EC content in winter PM<sub>2.5</sub> might result from additional coal combustion during the heating season, when coal was widely used in both suburban communities and rural individual families (Wang et al., 2006; Song et al., 2007; Schleicher et al., 2015). This additional coal burning could considerably increase Hg and EC emission, explaining the relatively higher PM<sub>2.5</sub>-Hg (1340 ng g<sup>-1</sup>,  $p < 0.01$ ) and carbon contents (Table S1)*".

885 L236: “discuss” instead of “discussed”

-- Changed.

890 L236: Why did you choose EC values for the further discussion? In my (probably  
rather ignorant) view, the elemental carbon fraction of the total carbon is not  
necessarily important for the interaction with Hg or other metals which will bind to  
functional groups of organic matter, but much less to unreactive elemental carbon. In  
any case, you should present a better introduction into the different carbon fractions  
(total carbon, organic carbon, elemental carbon, black carbon, inorganic carbon, : : :)  
895 and what they represent.

-- Here EC is used as an indicator for the source of PM because EC is an ideal  
indicator for combustion source and it is not readily modified by secondary processes  
in the atmosphere. PM with high EC can provide linkage with characteristics of Hg  
900 isotope signature unique for the combustion source. The EC and OC contents are  
not (should not be) intended for making any suggestion of chemical or  
physicochemical interactions between the airborne organic matter and Hg in the  
atmosphere.

905 -- To accommodate the above comments of this reviewer, we have revised the  
manuscript in line 260-263 of page 12. It reads “*Since EC contents were closely  
correlated to OC ( $r^2 = 0.89$ ,  $p < 0.001$ ), we discuss only EC contents in the following  
as an indicator for the source of PM, because EC is a significant pollutant of  
combustion source that is not readily modified by secondary processes in the  
910 atmosphere*”.

L239: “are” instead of “were”

-- Changed.

915

L244: “those” instead of “the” and add “a” after “From”

-- Changed.

920 L250: In my view, if you discuss “Hg contents in atmospheric particles”, then these should be mass-based values and not volumetric values. I don’t know the convention in atmospheric chemistry, but maybe “Hg load in atmospheric particles” could be used to compare volumetric concentrations from different sites?

925 -- We have changed the phrase according to the above comment. It reads now  
“*Previous studies also reported similar variation for Hg loads in atmospheric particles in Beijing (Wang et al., 2006; Schleicher et al., 2015)*”

L264: Please also consider the new data by Das et al. (reference see above) in this  
930 context. In general, I would keep the comparison to other studies rather short in the results section and save this for the discussion sections.

-- Added. Please see line 290 to 292 on page 13 in revised version.

935 L266: “are shown” instead of “were showed”

-- Changed.

L272: I suggest discussing the mass-based Hg contents in more detail and for instance  
940 comparing them with the OC contents. I wouldn’t be surprised if you find a correlation as if often observed in natural samples (e.g., Hg/C ratios in soils or sediments).

-- Again, OC and EC are used as independent indicators for source of PM  
945 (combustion). It was not used for implying any chemical interaction between the organic matter and Hg.

L289: “effects are” instead of “effect were”

950 -- Changed.

L292: “is” instead of “was”

-- Changed.

955

L295: Al is not an “insoluble” element but only somewhat less reactive compared with other elements during some mineral weathering reactions. As discussed above, I suggest removing the questionable normalization of the PM<sub>2.5</sub> samples to the rock composition of the upper continental crust because these particles are very different and contain multiple constituents (e.g., organic matter, secondary minerals) which cannot be simply compared with primary minerals in igneous rocks. I acknowledge that discussing element concentration ratios relative to Al (or other “lithogenic” elements) might make sense in some cases to estimate mineral matter vs. non-mineral matter, but you need to state and consider the assumptions of this approach (Al as a potential tracer for mineral material in PM<sub>2.5</sub>). Al concentration varied by more than an order of magnitude for the PM<sub>2.5</sub> samples (Table S3) and even several magnitudes for the source materials. Moreover, the maximum Al contents were only 16 ppm in the PM<sub>2.5</sub> samples and 63 ppm in the source materials, questioning whether this element can serve as a good reference base for the normalization of dilution effects.

970

-- We have revised the sentence. Please see in the revised text of the paper (see line 323). It reads now “*The EF of a given element was calculated using a double normalization (to the less reactive element Al here) and the upper continental crust (UCC) (Rudnick and Gao, 2003) was chosen as the reference (see detailed in Supporting Information)*”.

975

-- We agree with this reviewer that Al as a normalizer may not be ideal for performing calculation of enrichment factors for atmospheric PM<sub>2.5</sub>. Without more appropriate elements available, we still use Al for the enrichment factor (EF) calculation in this study because that Al is well adapted to this normalization as it is usually not of anthropogenic origin and it is not readily modified by secondary processes in the atmosphere. As mentioned by the reviewer, the main goal of such a double normalization is to show how difference (pollution level) of the studied objects compared to natural materials, we think the use of Al does suit this need. The high EF(Hg) values for most samples imply clearly that somehow Hg is enriched in PM<sub>2.5</sub> by natural or anthropogenic processes (or contribution), and that more systematic

980

985

research is needed for better understanding this enrichment. This is why we conducted this study with an attempt to use isotope approach. The EF calculation has been widely used in research of atmospheric aerosol particles, especially on a pollution aspect (Milford and Davidson, Journal of the Air Pollution Control Association, 35:12, 1249-1260, doi: 10.1080/00022470.1985.10466027, 1985; Gao et al., Atmos. Environ., 36, 1077–1086, doi:10.1016/S1352-2310(01)00381-8, 2002; Waheed et al., Aerosol Sci. Technol., 45, 163-171, doi: 10.1080/02786826.2010.528079, 2011; Mbengue et al., Atmos. Res., 135, 35-47, doi: 10.1016/j.atmosres.2013.08.010, 2014; Lin et al., Environ. Pollut., 208, 284-293, doi: 10.1016/j.envpol.2015.07.044, 2016).

-- To accommodate the above comments of this reviewer, we have added relevant references to show EF is widely used in atmosphere and revised the manuscript in line 325-328 for Al.

L296: This approach might have some usefulness in interpreting element contents in relatively coarse grained and mineral-matter dominated river sediments (e.g., Chen et al., 2014, G3), but I am not convinced that it can be easily adapted to atmospheric PM<sub>2.5</sub> samples.

-- Again, we agree with this reviewer that Al and the UCC as reference points may not be ideal for performing calculation of enrichment factors for atmospheric PM<sub>2.5</sub>. There is a need of using source-specific elemental compositions for such data plotting or calculation. As shown above (reply to general comments), it has been commonly used in the PM literatures. We thus choose to use it in this study to show easily the enrichment of Hg in our PM<sub>2.5</sub> samples compared to the natural up continental crust. Future study for addressing this issue should be conducted and a better method may be proposed.

L300: “is” instead of “was”. In addition, the “UCC” is generally not a good reference point for “natural terrestrial reservoirs” when discussing mercury cycling in the environment which is often dominated by organic-matter-bound Hg. Moreover, I believe that the 50 ppb average value for “lithogenic” Hg (UCC) from the Rudnick&Gao compilation is actually very poorly-constrained and might be too high

considering newer data (see e.g., discussion in Canil et al., 2015, Chem. Geol., doi: 10.1016/j.chemgeo.2014.12.029 or data on various rock reference materials from Marie et al., 2015, GGR, doi: 10.1111/j.1751-908X.2013.00254.x).

1025 -- We have revised “was” into “is”. The response for UCC is showed in the front.  
The difference of the reference value is more likely due to that the investigated  
samples are totally different, one from Canada (Canil et al., 2013) and another one  
from East China (Rudnick and Gao, 2003) and that the calculation was carried out  
using different methods or data set. Anyway this is out the main goal of this study.  
1030 In spite of this, it will not change considerably the order of EF values among samples.  
As we mentioned, the choice of the fine particle from the west Gobi Desert would be  
more appreciable given the actual background of study area, but lack of Hg data, we  
are not able to carry out such calculation. The use of UCC also allows for a  
comparison with the chemistry of other atmosphere particles worldwide.

1035  
L302: This statement doesn’t make sense to me. Table S4 does not contain Hg  
concentrations. If you are referring to the Hg concentrations of topsoil samples in  
Table S2, then these are very variable and certainly dominated by Hg sources other  
than “lithogenic” aluminosilicates. Thus, although higher Hg contents (or EFs) might  
1040 indeed imply that the Hg is not originating from crustal rocks, this doesn’t prove a  
“strong anthropogenic contribution” because Hg in PM<sub>2.5</sub> might have many “natural”  
(or at least “non-local industrial”) Hg sources other than the UCC. Normalizing metal  
concentrations in industrial waste materials such as sintering dust to UCC values is  
also not really useful in my view. If enrichment factors should be calculated, I would  
1045 rather suggest to normalize element contents in urban atmospheric PM<sub>2.5</sub> samples to  
contents in “pristine” atmospheric PM<sub>2.5</sub> samples collected far away from local  
pollution sources. However, even this is probably difficult (if technically feasible at  
all) because of the different dominant constituents of the particles (e.g.,  
mineral-matter vs. organic matter).

1050  
-- We appreciate the reviewer for the above comments. Indeed, we made incorrect  
statement by referring it to Table S4. It should be referring Table S2. We have  
made the correction now. Please see the revised version of marked manuscript in  
line 334 on page 15.

1055

-- We agree that the UCC may be not the ideal reference. As shown above (reply to general comments), it has been commonly used in the PM literatures. We thus used it in this study for a global comparison. Future study for addressing this issue should be conducted and a better method may be proposed.

1060

L306: Don't get me wrong, I am totally convinced that the collected PM<sub>2.5</sub> samples are strongly influenced by anthropogenic contributions, I am just not convinced by the presented argumentation.

1065

-- We have revised the sentence. Now, it reads "*The strong anthropogenic contribution may be also supported by the relationships between Hg and other particulate components in PM<sub>2.5</sub>.*"

1070

L308: Maybe I am getting confused now, but isn't it rather obvious that volumetric-based element concentrations correlate with the volumetric PM<sub>2.5</sub> content or other elemental contents (more particles = higher volumetric element contents)? It seems actually surprising that you only get an  $r^2$  of 0.4 for the correlation of volumetric Hg and PM<sub>2.5</sub>. This implies that the mass-based Hg concentrations are varying over the seasons (see Table S1) which should be further explored and discussed in my view (and maybe also Hg/OC ratios etc.).

1075

1080

-- As shown above (reply to general comments), mixing of binary system (air mass) yields a straight line for target components when volumetric concentration unit is used; good linear relationships in volumetric concentration plots may indicate mixing of two air mass sources, particularly the change of the volume concentration impacted by an air mass for a few days in the same direction, as described of winter samples. However, linear relationship is not good over the long time period of observation (4 seasons, for instance), mainly because of the seasonal variation of air masses. The difference of the slopes of the linear relationships indicates the variance of target components in seasonal air masses, which potentially suggests the target component has distinct sources. This differences are observed in Hg (volume-based) concentration vs PM<sub>2.5</sub> and Zn (volume-based) concentration. In contrast, good linear relationship over the seasons may indicate that the target components have

1085



collaboratively similarity even though they are emitted from different sources (e.g. Hg  
1090 vs EC in volumetric concentration). Thus, we investigated the relationship between  
Hg and other elements on a volume basis (Fig. 4).

L310: “results” instead of “resulted”

1095 -- Changed

L311/312: Again, I suggest discussing only element correlations on a mass basis.

-- We have replied to the above comments.

1100

L312: “show” instead of “showed”

-- Changed.

1105 L318: Again, I don’t doubt the anthropogenic contribution in PM<sub>2.5</sub> but I believe that  
the calculation of EFs using AI and relative to the UCC is not meaningful and  
generates values which are not a realistic quantitative estimate of the true  
anthropogenic enrichment relative to “natural PM<sub>2.5</sub>”. These extremely high numbers  
seem to imply extreme anthropogenic enrichment effects whereas some of it can be  
1110 simply explained with higher metal contents in natural organic matter compared with  
crustal rocks.

-- Again, we agree with this reviewer that AI and the UCC as reference points may not  
be ideal for performing calculation of enrichment factors for atmospheric PM<sub>2.5</sub>.  
1115 There is a need of using source-specific elemental compositions for such data plotting  
or calculation. As we mentioned, the EF calculation just show how enriched an  
element in a certain reservoir compared to a global “natural” reservoir, no matter what  
is the process or contribution source. The fact that most PM<sub>2.5</sub> samples have very  
high EFs do indicate that these samples are somehow enriched in Hg compared to for  
1120 example the UCC, by natural processes (such as organic incorporation as the reviewer  
mentioned) or by anthropogenic input. Sure, we cannot exclude the natural effect on  
the enrichment of Hg in these particles by natural organic process/emission (we have

never denied this in the text), but we cannot exclude the enormous input of Hg by anthropogenic input either. The fact is that, for calculating the EF value, one can  
1125 only choose a single reference. Considering the existing data set and the limited studies of Hg in atmosphere and in particles of “natural” reservoirs, the UCC with a large available data set is likely the best choice at the moment. We think that this is the reason why the EF approach (usually normalized to UCC) has been commonly used in the literature of PM studies. Future study for addressing this issue should be  
1130 conducted and a better method may be proposed. This is also one of the most important inputs of this study, given the fact that most of these fine particles are highly enriched in heavy metals, it is absolutely necessary to carry out further systematic study on heavy metal issue, especially in a such populated region like Beijing, where over 21 million persons live, without taking into account people living  
1135 in the adjacent region and the numerous visitors to the Chinese Capital.

L319: What do you mean by “largely enriched”? Do you mean “strongly enriched”?

-- Changed.

1140

L320: What do you mean by “centralized human activities”? This term is not clear to me.

-- We have changed it to “elevated anthropogenic activities”.

1145

L323: add “a” before “large”

-- Added.

1150 L323-335: This section illustrates a problematic tendency in the interpretation of the data. The finding that Hg isotope ratios are “consistent” with those of potential source materials is not sufficient to make strong statements about Hg sources. In order to establish a robust link between the Hg isotope data of the PM<sub>2.5</sub> samples and specific anthropogenic Hg sources, you first need to show that other potential Hg sources  
1155 (natural Hg and non-local anthropogenic Hg) exhibit contrasting signatures. Being “consistent” is not the same as identifying source materials based on isotopic

differences. The wording here develops from “consistent” and “likely indicated” to “confirming these anthropogenic emission(s) as the major sources..” which is not appropriate in my view. Please carefully check your arguments and tone down interpretations where necessary.

-- We have made revisions to tune down the interpretations and conclusions. Please see the revised version in line 357 to 370.

-- It now reads “Hg isotopic signatures may further indicate that human activities contributed to a large proportion of PM<sub>2.5</sub>-Hg. In this study, all samples displayed a large variation of  $\delta^{202}\text{Hg}$  (from  $-2.18\text{‰}$  to  $0.51\text{‰}$ , Table S1), similar to those (from  $-2.67\text{‰}$  to  $0.62\text{‰}$ , Table S2) determined for the particulate materials from potential sources such as coal combustion (averaged  $-1.10 \pm 1.20\text{‰}$ , 1SD,  $n = 8$ ), smelting ( $-0.87 \pm 0.82\text{‰}$ , 1SD,  $n = 6$ ) and cement plants ( $-1.42 \pm 0.36\text{‰}$ , 1SD,  $n = 10$ ), as demonstrated in Figs. 2 and 3. This similarity might indicate the emission of these anthropogenic sources as the possible contributing sources of PM<sub>2.5</sub>-Hg. Though the anthropogenic samples collected in this study could not cover the whole spectrum of anthropogenic contributions, previous studies reported similar  $\delta^{202}\text{Hg}$  range (from  $-2.64\text{‰}$  to  $0.77\text{‰}$ ) for potential source materials worldwide (Biswas et al., 2008; Estrade et al., 2011; Sun et al., 2013; Sun et al., 2014; Yin et al., 2014; Wang et al., 2015b). In fact, most PM<sub>2.5</sub> samples possessed  $\Delta^{199}\text{Hg}$  similar to those determined in above-mentioned particulate materials ( $-0.27\text{‰}$  to  $0.04\text{‰}$ , Figs. 2 and 3) in this study, suggesting these anthropogenic emission as the major sources of PM<sub>2.5</sub>-Hg”.

1180

L338: Please consider my critical comments about the Al normalization written above.

-- Again, we appreciate the reviewer for the above comments. We agree that Al may be not the ideal reference. As shown above (reply to general comments), Al is well adapted to this normalization as it is usually not of anthropogenic origin and it is not readily modified by secondary processes in the atmosphere, and it has been commonly used in the PM literatures. We thus used it in this study. Future study for addressing this issue should be conducted and a better method may be proposed.

1190

L350: Does “As a result” refer to the previously discussed PCA analysis? As far as I can tell, Hg isotope data were not included in the PCA analysis. How can you state with certainty that “the Hg isotope compositions suggested: : :” if you don’t know whether the measured Hg isotope signatures of the local anthropogenic sources are  
1195 distinct from other potential sources?

-- Revised. It now reads “*As a result, the Hg isotopic compositions may potentially suggest that coal combustion, smelting and cement plants were major sources of PM<sub>2.5</sub>-Hg*”.

1200

L353: “are” instead of “were”

-- Changed.

1205 L355: Would you expect a linear relationship between delta-values and EFs based on stable isotope mixing theory? As you are certainly aware, mixing lines of delta values vs. concentrations are only linear if plotted with the inverse concentration (1/Hg).

-- No, we did not expect a linear relationship between delta-values of Hg isotopes and  
1210 EF(Hg), but indeed, a linear relationship is observed and could not be explained by the stable isotope mixing theory.

L360: Please explain what the “EC/Al” ratio is supposed to show. Is this maybe a measure for the relative content of organic matter (or rather only certain C fractions)  
1215 and mineral matter in the PM<sub>2.5</sub> samples?

-- This is a measure for the relative content of elemental carbon (soot). Since EC is used as an indicator for the source of PM, because EC is an ideal indicator for combustion source and not readily modified by secondary processes in the atmosphere,  
1220 the EC/Al ratio is used to show the effect of particles from combustion sources on Hg isotopic composition of PM<sub>2.5</sub>.

L369: “considerably” instead of “considerately”

1225 -- Changed.

L370: It appears that this “winter effect” on carbon contents is mainly apparent in OC and less in EC.

1230 -- The mass-based concentrations of Hg, EC and OC in winter are significantly ( $p < 0.01$ ) higher than those in other three seasons. As shown above, EC is an ideal indicator for combustion source and not readily modified by secondary processes in the atmosphere, EC thus as an indicator for the source of PM may provide linkage with characteristics of Hg isotope signature unique for the combustion source.

1235

L373: Again, being “consistent” is not a strong support but only shows that it could be possible to explain the data in this way, without demonstrating that other explanations are not possible.

1240 -- We have reworded this sentence. Please see the revised version of the manuscript in line 401 to 405. It reads now “*In this study, both  $\delta^{202}\text{Hg}$  (mean  $-0.71 \pm 0.37 \text{ ‰}$ ) and  $\Delta^{199}\text{Hg}$  ( $-0.08 \pm 0.11 \text{ ‰}$ , 1SD,  $n = 6$ ) for winter  $\text{PM}_{2.5}$  samples were consistent with those in coals (average  $\delta^{202}\text{Hg}$  values of  $-0.73 \pm 0.33 \text{ ‰}$  and  $\Delta^{199}\text{Hg}$  of  $-0.02 \pm 0.08 \text{ ‰}$ , respectively) from northeastern China (Yin et al., 2014), possibly supporting the above conclusion*”.

1245

L375: What do you mean by “rapid” in this context?

-- We have revised this sentence. Now it reads “*Compared to the data of other seasons, the volumetric EC concentrations varied greatly in winter, whereas the Zn/Al ratio of the same season remained stable*”.

1250

L376: What is the relevance of the Zn/Al ratio for Hg cycling? Please add more explanations.

1255

-- The Zn/Al ratio is not used for Hg cycling, but as an indicator for PM emission sources of industries that could emit particulate Hg too. Please see line 411 to 412 in revised version.

1260 L382: “potentially” instead of “eventually”

-- Changed.

L383: Again, does “lower contents of Hg” refer to mass-based on volume-based  
1265 concentrations? I think that the mass-based Hg concentration were actually highest in winter.

-- It refers to the volume-based concentration. We have revised this sentence. Now  
it reads *“In this case, the fact that the transported air masses were derived from the  
1270 background region (less populated and underdeveloped) could potentially explain both the lower volume-based concentration of Hg, TEs (e.g. Zn) and EC (Fig. 7) and the higher mass-based contents of Hg, TEs (e.g. Zn) and EC (Table S1) in some winter samples”*.

1275 L388: I think that the “higher EC content” in autumn is mainly seen in volume-based but not so much in mass-based contents.

-- Revised. Please see in the revised version. It reads *“Biomass burning that often occurred in north China might be the cause of relatively higher EC volumetric  
1280 concentrations in autumn PM<sub>2.5</sub>”*.

L397-399: I don’t know the regulations for ACP, but in my opinion references to manuscripts “in preparation” should be removed.

1285 -- Removed.

L401: Another potential reference for light  $\Delta^{199}\text{Hg}$  of litter could be Jiskra et al. (EST, 2015, doi: 10.1021/acs.est.5b00742).

1290 -- Added.

L404: Again, please try to explain the relevance of the Zn/Al ratio in the context of

the studied samples.

1295 -- They are indicators for PM from industrial (e.g. metal smelting) emission sources.  
We have added relevant information in the context. See line 411 to 412 in the  
revised version.

L407: “occurring” instead of “occurred”

1300

-- Changed.

L408: “EC enrichment in Autumn particles” implies in my understanding that you  
talk about mass-based concentrations. However, this effect is only seen for  
1305 volume-based concentrations and the average mass-based EC value for autumn is  
lower than for winter.

-- We have revised the sentences. Now it reads *“In fact, the largely occurring  
biomass burning in the south (Hebei and Henan provinces) may lead to the EC  
1310 content (volume-based) increasing in autumn air mass. Thus, the high EC air mass  
input from biomass burning could explain the different trend which displayed by  
autumn PM<sub>2.5</sub>, while the above-discussed contribution from industries (mainly  
smelting) could explain the higher Zn (at a given EC content) in summer samples”*.

1315 L412: add “which” before “displayed”

-- Changed.

L418: “Much higher” than which other samples or reference points?

1320

-- Changed.

L421: Maybe add “or fractionation during atmospheric processing” after  
“contribution”

1325

-- Added.

L428: Did these previous studies also report data on the PBM fraction which is relevant here?

1330

-- No, these studies did not report isotopic data on the PBM.

L445: Can you add more information on these “background particles” and their assumed composition?

1335

-- We have revised this sentence. Now it reads *“Finally, as the background  $PM_{2.5}$  with little input from anthropogenic activities are likely characterized by low contents of trace metals (such as Zn) and organic matter (Song et al., 2007; Zhou et al., 2012). As shown in Fig. 7, the  $PM_{2.5}$  samples having relatively low EC content and Zn/Al ratio may be representative of the long-range transport contribution from such background  $PM_{2.5}$ ”*.

1340

L445: “matter” instead of “matters”

1345 -- Changed.

L448: “process effects” instead of “processes effect”

-- Done.

1350

L457: I suggest replacing “not induce significant” by “only induce very small” because the discussed processes have been in fact shown to cause small MIF by the NVE (see Smith et al., 2015 for precipitation and Wiederhold et al., 2010 for Hg(II)-thiol complexation)

1355

-- Done.

L459: I think that this statement is only correct for MIF but not for MDF.

1360 -- We have revised this sentence. See line 503. It reads *“Therefore, the effect of*



*adsorption or precipitation was probably limited on MIF of isotopic composition of PM<sub>2.5</sub>-Hg”.*

L462: add “a” before “possible”

1365

-- Done.

L463: “Potentially” instead of “Eventually”

1370

-- Done.

L467: “ratios” instead of “ratio”

-- Done.

1375

L472: Maybe better “contrasting even-mass” instead of “even contrast”

-- Changed: *“All these arguments suggest that these processes may not be the major mechanism to produce large even contrasting Hg isotope variation in Hg-enriched fine atmospheric particles”.*

1380

L474: “lack” instead of “lank”

-- We have revised this sentence.

1385

L476: I suggest adding “currently” after “is”

-- Revised. Please see line 535 to 537 in the revised version. It now reads *“We thus suggest that the contributions from different sources may be the better scenario to explain the seasonal variation of Hg isotopic compositions we measured for the PM<sub>2.5</sub> samples”.*

1390

L481-482: Please consider my critical comments about enrichment factors and try to identify and explain better which additional new information can be deduced based on

1395 the Hg isotope data.

-- We have considered the critical comments by the reviewer and have made necessary changes on the questioned discussion. Meanwhile, we have replied to the comments on EF accordingly in our response to general comments by the reviewer.

1400

L483: I am not sure whether you can really rule out an influence of atmospheric processing on the measured Hg isotope data in PM2.5 particles.

-- We agree with the reviewer that the processes affecting the Hg isotope compositions are likely present in the atmosphere. Our discussion was based on a simplified assumption that these processes would not have made significant impact on the Hg isotope signatures. This may be an over-simplification. To accommodate the concern of this review on the above statement, we have made modification on the text and now it reads *“Our data showed that mixing of variable contributing sources likely triggered the seasonal variation of Hg isotopic ratio”*.

1410

L487-488: “predominant contributions” instead of “predominated contribution”

-- Done.

1415

L489: Delete “the” and maybe add “probably” after “was”

-- Done.

1420 L495: This link to “species-specific Hg” is an interesting point but it hasn’t be discussed before in the manuscript and would require more explanations in my view.

-- Deleted this sentence.

1425 L496: “at” instead of “in a”

-- We have deleted this sentence.

L707-709: I suggest removing the reference “in preparation”.

1430

-- Removed.

Figure 1: I suggest adding the information “n = 6” or “n = 5” into the 4 columns of the figure (in the caption or maybe below the words of the seasons?). Alternatively, you could also consider plotting all individual data points together with the mean and SD. I am not sure how meaningful 25th and 75th percentiles are in a dataset with n = 5 or 6. In addition, as mentioned above, I suggest using mass-based concentrations for EC and THg.

1435

1440 -- We have made the revisions in the current version of the paper.

Figure 2: “analytical” instead of “analytic”

-- Changed.

1445

L756: I suggest adding “MIF during” after “or”

-- Added.

1450 Figure 4: Please consider my comments above on mass-based vs. volume-based concentrations.

-- Again, we appreciate this reviewer for the above comments. As for the issue of the volume-based concentration versus mass-based concentration, we have addressed in our response to the general comments by this reviewer.

1455

Figure 5: Please add more information about the relevance of “Co/Al” and “EC/Al” ratios in the context of Hg in PM<sub>2.5</sub> particles.

1460 -- They are indicators for PM emission sources of industry and combustion. We have added relevant information in the context.

Figure 6: Please consider my comment above on potential non-linearity in this plot when assuming a conservative two end-member mixing model.

1465

-- This reviewer is right that the relationship between Hg isotope compositions (e.g.  $\delta^{202}\text{Hg}$ ) and inverse of Hg concentrations ( $1/\text{Hg}$ ) may be better for the two end-member mixing model. In fact, we have considered the relationships between Hg isotope compositions ( $\delta^{202}\text{Hg}$  and  $\Delta^{199}\text{Hg}$ ) and  $1/\text{Hg}$  (in mass- or volume-based concentrations) for understanding our data sets, but they are not better for the interpretation for source apportionment in this study. This relationship may be not suitable for atmospheric particle due to the complex sources. In addition, the relationship was also not introduced in two published papers about the atmospheric particulate Hg isotopes for source identification (Rolison et al., 2013 and Das et al., 2006), they maybe had the similar problems.

1470

1475

-- To accommodate the above comments of this reviewer, we deleted the fitting lines in figure 6 in revised version.

1480

Figure 7: What are the units for the Zn/Al ratios on the y-axis (maybe Zn in ng/g and Al in mg/kg?). Again, I suggest using mass-based EC concentrations for the x-axis.

-- The units for Zn/Al ratios is ng/ $\mu\text{g}$  and we have revised this figure. As for the issue of the volume-based concentration versus mass-based concentration, we have addressed in our response to the general comments by this reviewer.

1485

SI, L34: “component” instead of “composition”. However, as written above I am not sure whether this approach should be transferred from river sediments to PM<sub>2.5</sub> particles and industrial sources materials considering their large variations in Al concentrations.

1490

-- We have changed it to component. We have addressed this Al-based EF issue in our response to the general comments by this reviewer.

1495

SI, L37: Did you use the same units for all elements and Al (e.g., ng/g) or did you use different units such as given in Table S3?

-- We used the same units for Al and other elements for EF calculation.

1500 SI, L64: Please explain what you mean by “petrological source contribution”? Maybe better “lithogenic”?

-- Changed.

1505 SI, L85: “were” instead of “are”

-- Changed.

1510 SI, Table S3: I suggest adding Hg and C into the table and check for (mass-based) elemental correlations.

-- Thanks for your suggestion. The Hg concentrations are already presented in the Table S1 and S2, and C concentrations of PM<sub>2.5</sub> are also presented in the Table S1.

1515

-- end --

## Isotopic composition for source identification of mercury in atmospheric fine particles

Qiang Huang<sup>1</sup>, Jiubin Chen<sup>1,\*</sup>, Weilin Huang<sup>2</sup>, Pingqing Fu<sup>3</sup>, Benjamin Guinot<sup>4</sup>, Xinbin Feng<sup>1</sup>,

Lihai Shang<sup>1</sup>, Zhuhong Wang<sup>1</sup>, Zhongwei Wang<sup>1</sup>, Shengliu Yuan<sup>1</sup>, Hongming Cai<sup>1</sup>, Lianfang

5 Wei<sup>3</sup> and Ben Yu<sup>1</sup>

<sup>1</sup>SKLEG, Institute of Geochemistry, Chinese Academy of Sciences, Guiyang 550081, China

<sup>2</sup>Department of Environmental Sciences, Rutgers, The State University of New Jersey, New Brunswick, NJ 08901, USA

<sup>3</sup>LAPC, Institute of Atmospheric Physics, Chinese Academy of Sciences, Beijing 100029, China

10 <sup>4</sup>Laboratoire d'Aérodologie UMR5560 CNRS-Université Toulouse 3, Toulouse, France

\* Corresponding author.

E-mail: [chenjiubin@vip.gyig.ac.cn](mailto:chenjiubin@vip.gyig.ac.cn) Tel.: +86 851 85892269.

**Abstract.** The usefulness of mercury (Hg) isotopes for tracing the sources and pathways of Hg (and its vectors) in atmospheric fine particles (PM<sub>2.5</sub>) is uncertain. Here, we measured Hg isotopic compositions in 30 potential source materials and 23 PM<sub>2.5</sub> samples collected in four seasons from the megacity Beijing (China), and combined the seasonal variation of both mass-dependent fractionation (represented by the ratio  $^{202}\text{Hg}/^{198}\text{Hg}$ ,  $\delta^{202}\text{Hg}$ ) and mass-independent fractionation of isotopes with odd and even mass numbers (represented by  $\Delta^{199}\text{Hg}$  and  $\Delta^{200}\text{Hg}$ , respectively) with geochemical parameters and meteorological data to identify the sources of PM<sub>2.5</sub>-Hg and possible atmospheric particulate Hg transformation. All PM<sub>2.5</sub> samples were ~~strong~~highly enriched in Hg and other heavy metals, and displayed ~~large~~wide ranges of both  $\delta^{202}\text{Hg}$  (−2.18 ‰ to 0.51 ‰) and  $\Delta^{199}\text{Hg}$  (−0.53 ‰ to 0.57 ‰), and small positive  $\Delta^{200}\text{Hg}$  (0.02 ‰ to 0.17 ‰). The results indicated that the seasonal variation of Hg isotopic composition (and elemental concentrations) was likely derived from variable contributions from ~~the~~ anthropogenic sources, with continuous input due to industrial activities (e.g. smelting, cement production and coal combustion) in all seasons, ~~where~~as coal combustion dominated in ~~W~~winter and biomass burning mainly ~~found~~ in ~~A~~autumn. The ~~significant more~~ positive  $\Delta^{199}\text{Hg}$  of PM<sub>2.5</sub>-Hg in ~~S~~spring and early ~~S~~summer was likely derived from long-range transported Hg that had undergone extensive photochemical reduction. The study demonstrated that Hg isotopes ~~may be potentially used~~~~are a powerful tool~~ for tracing the sources of particulate Hg and its vectors in the atmosphere.

**Keywords:** Mercury isotopic composition; Nonferrous metal smelting; Biomass burning; Long-range transport; Elemental carbon; Trace elements

## 1 Introduction

Mercury (Hg) is a globally distributed hazardous metal and is well known for its long-range transport, environmental persistence and ~~biological~~ toxicity (Kim et al., 2009; Selin, 2009; Schleicher et al., 2015). Hg is emitted to the atmosphere through natural and anthropogenic processes or reemission of previously deposited legacy Hg. It ~~has~~ three operationally defined forms: ~~including~~ gaseous elemental Hg (GEM), reactive gaseous Hg (RGM) and particle-bound Hg (PBM) (Selin, 2009). In general, GEM (> 90 % of the total Hg in atmosphere) is fairly stable and can be transported globally, whereas RGM is rapidly deposited from the atmosphere in wet and dry deposition, and PBM ~~is assumed to~~ can be transported more regionally (Selin, 2009; Fu et al., 2012). Recent measurements of PBM in several rural/urban areas have shown that Hg associated with particulate matter (PM) of size < 2.5  $\mu\text{m}$  (PM<sub>2.5</sub>-Hg) has typical concentrations <100 pg m<sup>-3</sup> in background atmospheric environments (Liu et al., 2007; Fu et al., 2008; Kim et al., 2012), but exceeds 300 pg m<sup>-3</sup> in contaminated regions (Xiu et al., 2009; Zhu et al., 2014). PM<sub>2.5</sub>-Hg is of particular concern because, once inhaled, both Hg and its vectors might have adverse effects on human beings.

Mercury has seven stable isotopes (<sup>196</sup>Hg, <sup>198</sup>Hg, <sup>199</sup>Hg, <sup>200</sup>Hg, <sup>201</sup>Hg, <sup>202</sup>Hg and <sup>204</sup>Hg) and its isotopic ratios in the nature have attracted much interest in recent years (Yin et al., 2010; Hintelmann and Zheng, 2012; Blum et al., 2014; Cai and Chen, 2016). Previous studies have reported both mass-dependent fractionation (MDF,  $\delta^{202}\text{Hg}$ ) and mass-independent fractionation (MIF, ~~mainstream~~ primarily observation of odd atomic weighed Hg isotopes,  $\Delta^{199}\text{Hg}$  and  $\Delta^{201}\text{Hg}$ ) of Hg isotopes in environments (Hintelmann and Lu, 2003; Jackson et al., 2004; Bergquist and Blum, 2007; Jackson et al., 2008; Gratz et al., 2010; Chen et al., 2012; Sherman et al., 2012). The nuclear volume effect (NVE) (Schauble, 2007) and magnetic isotope effect (MIE) (Buchachenko, 2009) are thought to be the main causes for odd-MIF (Bergquist and Blum, 2007; Gratz et al.,



2010; Wiederhold et al., 2010; Sonke, 2011; Chen et al., 2012; Ghosh et al., 2013; Eiler et al., 2014). Theoretical and experimental data suggested a  $\Delta^{199}\text{Hg}/\Delta^{201}\text{Hg}$  ratio  ~~$\gg 1.5$~~ about 1.6 for NVE (Zheng and Hintelmann, 2009, 2010b), and ~~the a~~  $\Delta^{199}\text{Hg}/\Delta^{201}\text{Hg}$  ratio mostly between 1.0 and $\leq 1.3$  for MIE as a result of photolytic reductions under aquatic (and atmospheric) conditions (Zheng and Hintelmann, 2009; Malinovsky et al., 2010; Wiederhold et al., 2010; Zheng and Hintelmann, 2010a; Sonke, 2011; Ghosh et al., 2013; Eiler et al., 2014). Over the past decade, studies indicated that Hg isotope ratios are useful for differentiating Hg sources in terrestrial samples, such as sediments (Jackson et al., 2004; Feng et al., 2010; Ma et al., 2013), soils (Biswas et al., 2008; Zhang et al., 2013a) and biota (Sherman et al., 2013; Yin et al., 2013; Jackson, 2015), and for distinguishing potential biogeochemical processes that Hg had undergone (Jackson et al., 2013; Sherman et al., 2013; Yin et al., 2013; Masbou et al., 2015). Up to now, ~~only a few~~several studies reported Hg isotopic compositions in atmospheric samples (Zambardi et al., 2009; Gratz et al., 2010; Chen et al., 2012; Sherman et al., 2012; Demers et al., 2013; Rolison et al., 2013; Fu et al., 2014; Demers et al., 2015a; Sherman et al., 2015; Yuan et al., 2015; Das et al., 2016; Enrico et al., 2016; Fu et al., 2016). These studies reported large variations of  $\Delta^{199}\text{Hg}$  and  $\delta^{202}\text{Hg}$  values for GEM (ranged from  $-0.41\text{‰}$  ‰ to  $0.06\text{‰}$  for  $\Delta^{199}\text{Hg}$ , and from  $-3.88\text{‰}$  to  $0.43\text{‰}$  for  $\delta^{202}\text{Hg}$ , respectively) (Zambardi et al., 2009; Gratz et al., 2010; Sherman et al., 2010; Rolison et al., 2013; Yin et al., 2013; Demers et al., 2015b; Das et al., 2016; Enrico et al., 2016; Fu et al., 2016) and for Hg in precipitation (from  $0.04\text{‰}$  ‰ to  $1.16\text{‰}$  for  $\Delta^{199}\text{Hg}$ , and from  $-4.37\text{‰}$  ‰ to  $1.48\text{‰}$  for  $\delta^{202}\text{Hg}$ , respectively) (Gratz et al., 2010; Chen et al., 2012; Sherman et al., 2012; Demers et al., 2013; Sherman et al., 2015; Wang et al., 2015b; Yuan et al., 2015). ~~More importantly~~In addition, recent studies have found MIF of even Hg isotopes (even-MIF,  $\Delta^{200}\text{Hg}$ ) in natural samples mainly related to the atmosphere, rendering Hg a unique heavy metal having "three-dimensional" isotope systems (Chen et al., 2012).

While Hg isotopes in both GEM and RGM have drawn much attention, those of PBM are comparably less studied in the literature. Indeed, only several prior studies have focused on Hg isotopes in PBM. Rolison et al. (2013) reported, for the first time,  $\delta^{202}\text{Hg}$  (of  $-1.61\text{‰}$  to  $-0.12\text{‰}$ ) and  $\Delta^{199}\text{Hg}$  values (of  $0.36\text{‰}$  to  $1.36\text{‰}$ ) for PBM from the Grand Bay area in USA, and the ratios of  $\Delta^{199}\text{Hg}/\Delta^{201}\text{Hg}$  close to 1 that was thought to be derived from in-aerosol photo-reduction. Huang et al. (2015) measured Hg isotope ratios for two  $\text{PM}_{2.5}$  samples taken from Guiyang of China, with  $\delta^{202}\text{Hg}$  of  $-1.71\text{‰}$  and  $-1.13\text{‰}$  and  $\Delta^{199}\text{Hg}$  of  $0.21\text{‰}$  and  $0.16\text{‰}$ , respectively. Das et al. (2016) measured Hg isotopic compositions of PBM in  $\text{PM}_{10}$  from Kolkata, Eastern India and found negative MDF and varied values of  $\Delta^{199}\text{Hg}$  between  $-0.31\text{‰}$  to  $0.33\text{‰}$ . These studies showed that the Hg isotope approach could be ~~eventually undeveloped~~ for tracking the sources and pathways of Hg species in the atmosphere.

China is one of the largest Hg emission countries in the world (Fu et al., 2012; Zhang et al., 2015), with a total estimated anthropogenic Hg emission of approximately 356 t in 2000 and 538 t in 2010 (Zhang et al., 2015). Coal combustion, nonferrous metal smelting, and cement production are the dominant Hg emission sources in China (collectively accounting for approximately over 80 % of the total Hg emission) (Zhang et al., 2015). Haze particles, especially  $\text{PM}_{2.5}$  that are actually among the most serious atmospheric pollutants in urban areas of China (Huang et al., 2014), are one of the important carriers of Hg (Lin et al., 2015b; Schleicher et al., 2015). ~~Ifn this case,~~  $\text{PM}_{2.5}$  ~~may be~~ emitted from the same source as Hg (Huang et al., 2014; Lin et al., 2015b; Schleicher et al., 2015; Zhang et al., 2015), quantifying Hg isotopes may provide direct evidence for the sources of both Hg and  $\text{PM}_{2.5}$  as well as the insight to the geochemical processes that they may have undergone.

In this study, we attempted to identify the sources of  $\text{PM}_{2.5}$ -Hg in Beijing, the capital of China, using Hg isotopic composition ~~coupled~~ with meteorological and other geochemical parameters.

We selected Beijing as the study site because like many other Chinese megacities, Beijing has suffered severe PM<sub>2.5</sub> pollution (Huang et al., 2014; Gao et al., 2015) and is considered as the most PBM polluted area in China (Schleicher et al., 2015). In the past decade, only a few prior studies quantified the Hg concentrations in PM<sub>2.5</sub> samples collected from Beijing (Wang et al., 2006; Zhang et al., 2013b; Schleicher et al., 2015), while no research attempted to track its sources using the Hg isotope approach. The specific objectives of this study were 1) to characterize the seasonal variation of Hg isotope compositions in PM<sub>2.5</sub> of Beijing and 2) to test the effectiveness of the Hg isotope technique for tracking the sources of the PM<sub>2.5</sub>-Hg.

## 2 Materials and methods

### 2.1 Field site and sampling method

Beijing (39.92° N and 116.46° E) has a population of over 21 million. It is located in a temperate warm zone with typical continental monsoon climate. The northwestern part of the Great Beijing Metropolitan is mountainous, while the southeastern part is flat. It has an average annual temperature of about 11.6 °C, with the mean value of 24 °C in ~~S~~summer and -2 °C in ~~W~~winter. In the ~~S~~summer, wind blows mainly from southeast under ~~the~~ influence of hot and humid East Asian monsoon, whereas the cold and dry monsoon blows from Siberia and Mongolia in the ~~W~~winter. The ~~W~~winter heating season in Beijing normally starts on 15 Nov and ends on 15 Mar.

PM<sub>2.5</sub> was sampled from Sep 2013 to Jul 2014 using a high volume PM<sub>2.5</sub> sampler placed on a building roof (approximately 8 m above the ground) of the Institute of Atmospheric Physics, Chinese Academy of Sciences, which is located between the north 3<sup>rd</sup> and 4<sup>th</sup> ring of Beijing. The meteorological model showed that the arriving air masses were transported mainly by two directions, with the northwest winds dominated in ~~W~~winter and the southern winds mainly in ~~S~~summer. The sampling information ~~was~~ detailed in Supporting Information (see Table S1). ~~Each-The~~ PM<sub>2.5</sub> samples ~~were~~ collected using a Tisch Environmental PM<sub>2.5</sub> high volume air

sampler, which collects particles at a flow rate of  $1.0 \text{ m}^3 \text{ min}^{-1}$  through a  $\text{PM}_{2.5}$  size selective inlet. As the particles travel through the size selective inlet the larger particles are trapped inside of the inlet while the smaller-size ( $\text{PM}_{2.5}$ ) particles continue to travel through the  $\text{PM}_{2.5}$  inlet and are collected on a pre-combusted ( $450^\circ\text{C}$  for 6 hrs) quartz fiber filter (Pallflex 2500 QAT-UP,  $20 \text{ cm} \times 25 \text{ cm}$ , Pallflex Product Co., USA). The mass of  $\text{PM}_{2.5}$  on each filter was measured using a gravimetric method by the mass difference before and after sampling. The filters were conditioned in a chamber with a relative humidity of about 48% and a temperature of  $20 \pm 2^\circ\text{C}$  for about 24 h before and after by continuously sampling air for 24 hrs onto a pre-combusted ( $450^\circ\text{C}$  for 6 hrs) quartz fiber filter (Pallflex 2500 QAT-UP,  $20 \text{ cm} \times 25 \text{ cm}$ , Pallflex Product Co., USA) at a constant airflow rate of  $1.0 \text{ m}^3 \text{ min}^{-1}$ . A field blank was also collected during sampling and the value ( $< 0.2 \text{ ng}$  of Hg,  $n = 6$ ) was negligible ( $< 2\%$ ) compared to the total Hg mass contained in the  $\text{PM}_{2.5}$  samples. After sampling, each filter was recovered, wrapped with a pre-combusted (to eliminate Hg) aluminum film, and packed in a sealed plastic bag. The filters were brought back to the laboratory and stored at  $-20^\circ\text{C}$  prior to analysis.

In order to better assign sources of Hg, we collected and measured 30 solid samples of different materials that may be potential Hg (and  $\text{PM}_{2.5}$ ) sources and that may contribute to  $\text{PM}_{2.5}$ -Hg in Beijing. They included: (i) eight samples (including feed coal powder, bottom ash, desulfurization gypsum and fly ash) from two coal-fired power plants (from Hubei and Mongolia provinces); (ii) six samples from a Pb-Zn smelting plant (including blast furnace dust, dust of blast furnace slag, sintering dust, coke, return powder and agglomerate); (iii) ten samples from a cement plant (including coal powder, raw meal, sandstone, clay, limestone, steel slag, sulfuric acid residue, desulfurization gypsum and cement clinker), six of which were published in previous work (Wang et al., 2015b); (iv) four topsoil samples (surface horizon: organics mixed with mineral matter, these samples are not natural soil on typical soil profiles) from the C-center

city of Beijing (Olympic Park, Beihai Park, the Winter Palace and Renmin University of China (RUC)), two dust samples from RUC (one building roof dust and one road dust); (v) one total suspended particle (TSP, the sampling of TSP was carried out using a made in house low volume (about 1.8 m<sup>3</sup> h<sup>-1</sup>) air sampler equipped with a TSP inlet, and a pre-cleaned mixed fiber filter (47 mm) was used for the TSP low-volume inlets) sample from ~~the~~ atmosphere of rural area of Yanqing district, northwest of Beijing; and (vi) two urban road dust, two suburban road dust and one suburban topsoil samples from Shijiazhuang city southwest from Beijing. Though the automobile exhausts might also be a contributing source of PM<sub>2.5</sub>-Hg, we were not able to measure its Hg isotope ratios due to its exceedingly low Hg concentration (Won et al., 2007).

## 2.2 Materials and reagents

Materials and reagents used in this study were similar to those described in ~~the~~ previous study (Huang et al., 2015). A 0.2 M BrCl solution was prepared by mixing the distilled concentrated HCl with pre-heated (250 °C, 12 hrs) KBr and KBrO<sub>3</sub> powders. Two SnCl<sub>2</sub> solutions of 20 and 3 % (wt) were prepared by dissolving the solid in 1 M HCl and were used for on-line reduction of Hg for concentration and isotope measurements, respectively. A 20 % (wt) NH<sub>2</sub>OH•HCl solution was used for BrCl neutralization.

Two international Hg standards NIST SRM 3133 and UM-Almaden (~~provided by J. Blum and J. Wiederhold~~) were used as the reference materials for Hg isotope analysis. NIST SRM 997 Thallium (20 ng mL<sup>-1</sup> Tl in 3 % HNO<sub>3</sub>) was employed for mass bias correction (Chen et al., 2010; Huang et al., 2015). Two other reference materials, the solution Fluka 28941 Hg (TraceCERT<sup>®</sup>, Sigma-Aldrich) and the soil GBW07405 (National Center for Standard Materials, Beijing, China) were used as in-house isotope standards, and were regularly measured for quality control of Hg concentration and isotope measurements. It was noteworthy that Fluka 28941 Hg is a standard different from ETH Fluka Hg (Jiskra et al., 2012; Smith et al., 2015).

### 2.3 Isotopic Composition Analysis.

Mercury bound on PM<sub>2.5</sub> and solid source materials was released via a dual-stage combustion protocol and it was captured in a 5-mL 40% acid mixture (2:4:9 volumetric ratio of 10 M HCl, 15 M HNO<sub>3</sub> and Milli-Q water) (Huang et al., 2015). Detailed procedure is available in Huang et al. (2015). In brief, the filter samples were rolled into a cylinder and placed in a furnace quartz tube (25 mm OD, 22 mm ID, 1.0 m length), which was located in two combustion tube furnaces (BTF-1200C-S, Anhui BEQ Equipment Technology Ltd., China). The solid source samples were powdered and weighted into a sample quartz tube (20 mm OD, 18 mm ID, 10 cm length), which was capped with pre-cleaned-quartz wool (pre-cleaned at 500 °C) at both ends to prevent particle emission. The sample quartz tube was then placed into the large quartz tube of the furnace. The samples were combusted through a temperature-programmed routine in the dual-stage combustion and acid solution trapping system. An aliquot (50 µL) of 0.2 M BrCl was added to the above trapping solution to stabilize the for converting Hg<sup>0</sup> to Hg<sup>2+</sup>. The trapping solution for each sample was diluted to a final acid concentration of about 20 % and was stored at 4 °C for the subsequent Hg concentration and isotope measurement. The accuracy and precision of the dual-stage combustion protocol were evaluated by the analysis of the certified reference material GBW07405 using the same digestion method. The detectable Hg in the procedural blank (< 0.2 ng, *n* = 12) of this dual-stage combustion method was negligible compared to the amount of total Hg (> 5 ng) in both PM<sub>2.5</sub> samples and procedural standards.

Mercury isotope analyses were performed on the MC-ICP-MS (Nu Instruments Ltd., UK) at the State Key Laboratory of Environmental Geochemistry, Institute of Geochemistry, China. The details of the analytical procedures and the instrumental settings were given in previous studies (Huang et al., 2015; Lin et al., 2015a; Wang et al., 2015b; Yuan et al., 2015). In brief, a home-made cold-vapor generation system was coupled with an Aridus II Desolvating Nebulizer for

respective Hg and Tl introductions. The Faraday cups were positioned to simultaneously collect  
 205 five Hg isotopes and two Tl isotopes including  $^{205}\text{Tl}$  (H3),  $^{203}\text{Tl}$  (H1),  $^{202}\text{Hg}$  (Ax),  $^{201}\text{Hg}$  (L1),  
 $^{200}\text{Hg}$  (L2),  $^{199}\text{Hg}$  (L3), and  $^{198}\text{Hg}$  (L4). The instrumental mass bias was double corrected by both  
internal standard NIST SRM 997 Tl and by sample-standard bracketing (SSB) using international  
standards NIST SRM 3133 Hg. The MDF of isotopes is represented by delta ( $\delta$ ) notation in units  
 of permil (‰) and defined as the following equation (Blum and Bergquist, 2007):

$$\delta^x\text{Hg} (\text{‰}) = [({}^x\text{Hg}/{}^{198}\text{Hg})_{\text{sample}}/({}^x\text{Hg}/{}^{198}\text{Hg})_{\text{NIST3133}} - 1] \times 1000 \quad (1)$$

where  $x = 199, 200, 201$ , and  $202$ . MIF is reported as the deviation of a measured delta value  
 from the theoretically predicted value due to kinetic MDF according to the equation:

$$\Delta^x\text{Hg} (\text{‰}) = \delta^x\text{Hg} - \beta \times \delta^{202}\text{Hg} \quad (2)$$

where the mass-dependent scaling factor  $\beta$  is of about 0.252 0.5024 and 0.752 for  $^{199}\text{Hg}$ ,  $^{200}\text{Hg}$   
 215 and  $^{201}\text{Hg}$ , respectively (Blum and Bergquist, 2007).

The Fluka 28941 Hg standard was carefully calibrated against the NIST SRM 3133 Hg and  
 the long-term measurements yielded an average value of  $-1.00 \text{‰} \pm 0.13 \text{‰}$  (2SD,  $n = 15$ )  
 for  $\delta^{202}\text{Hg}$ , with a precision similar to that (0.10 ‰,  $n = 114$ ) obtained for NIST SRM 3133 Hg.  
 Our repeated measurements of UM-Almaden and GBW07405 had average  $\delta^{202}\text{Hg}$ ,  $\Delta^{199}\text{Hg}$  and  
 220  $\Delta^{201}\text{Hg}$  values of  $-0.60 \pm 0.09 \text{‰}$ ,  $-0.01 \pm 0.06 \text{‰}$  and  $-0.03 \pm 0.06 \text{‰}$  (2SD,  $n = 18$ ) and of  
 $-1.77 \pm 0.14 \text{‰}$ ,  $-0.29 \pm 0.04 \text{‰}$  and  $-0.32 \pm 0.06 \text{‰}$  (2SD,  $n = 6$ ) for  $\delta^{202}\text{Hg}$ ,  $\Delta^{199}\text{Hg}$  and  
 $\Delta^{201}\text{Hg}$ , respectively, consistent with the data published in previous studies (Blum and Bergquist,  
 2007; Zheng et al., 2007; Smith et al., 2008; Carignan et al., 2009; Zambardi et al., 2009; Chen et  
 al., 2010; Sherman et al., 2010; Wiederhold et al., 2010; Huang et al., 2015). In this study, the  
 225 2SD uncertainties (0.14 ‰, 0.04 ‰ and 0.06 ‰ for  $\delta^{202}\text{Hg}$ ,  $\Delta^{199}\text{Hg}$  and  $\Delta^{201}\text{Hg}$ ) obtained for the  
 soil reference GBW07405 were considered as the typical external uncertainties for some PM<sub>2.5</sub>

samples that were measured only once due to their limited mass. Otherwise, the uncertainties were calculated based on the multiple measurements (Tables S1 and S2).

## 2.4 Concentration measurements

A small fraction of each trapping solution (20 % acid mixture) was used to measure the Hg concentration on CVAFS (Tekran 2500, Tekran® Instruments Corporation, CA), with a precision better than 10 %. The recoveries of Hg for the standard GBW07405 and 30 solid samples were in the acceptable range of 95 to 105 %; but no recovery of Hg for the PM<sub>2.5</sub> samples was determined due to limited availability of the samples. A 0.5 cm<sup>2</sup> punch from each filter samples was analyzed forThe contents of organic and elemental carbon (OC/EC) ~~were analyzed using an OC/EC analyzer with a Desert Research Institute (DRI) Model 2001 Thermal/Optical Carbon Analyzer (Atmoslytic Inc., Calabasas, CA, USA) and~~ following the Interagency Monitoring of Protected Visual Environments (IMPROVE) thermal evolution protocol (Wang et al., 2005). The calculated uncertainties were  $\pm 10$  % for the measured OC and EC data. The concentrations of other elements (e.g. Al, Cd, Co, Pb, Sb, Zn, K, Ca and Mg) were also measured for 14 of the PM<sub>2.5</sub> samples and 16 of the selected potential source materials using ICP-MS or ICP-AES after total acid (HNO<sub>3</sub>-HF-HClO<sub>4</sub>) digestion. A 1.5 cm<sup>2</sup> punch from each filter samples and about 0.05 g of solid material samples were dissolved completely with HNO<sub>3</sub>-HF-HClO<sub>4</sub>. Note that, due to limited mass of PM<sub>2.5</sub> samples, 9 PM<sub>2.5</sub> samples were ~~run-out~~exhausted after isotope analysis, and only 14 PM<sub>2.5</sub> samples were analyzed for the other elements. The soil standard GBW07405 was digested using the same protocol and the measured concentrations of trace elements (TEs, including Hg) were consistent with the certified values.

## 3 Results

### 3.1 General characteristics of PM<sub>2.5</sub>



The contents of PM<sub>2.5</sub>, OC and EC for the 23 samples ~~were~~ presented in Table S1. The volumetric contents of PM<sub>2.5</sub> ranged from 56 to 310  $\mu\text{g m}^{-3}$  (average  $120 \pm 61 \mu\text{g m}^{-3}$ ), and were higher in ~~A~~autumn than the three other-~~three~~ seasons (Fig. 1). The PM<sub>2.5</sub> samples showed large variations of carbon concentrations, with OC ranged from 2.8 to 42  $\mu\text{g m}^{-3}$  and EC from 1.2 to 9.2  $\mu\text{g m}^{-3}$ , averaging of  $12 \pm 9.6$  and  $3.7 \pm 2.3 \mu\text{g m}^{-3}$ , respectively. The OC and EC contents in ~~A~~autumn (respective mean of  $14 \pm 11$  and  $4.9 \pm 2.8 \mu\text{g m}^{-3}$ ,  $n = 6$ ) and ~~W~~winter (mean of  $19 \pm 13$  and  $5.1 \pm 2.3 \mu\text{g m}^{-3}$ ,  $n = 6$ ) were approximately doubled compared to those in ~~S~~spring (mean of  $7.7 \pm 1.4$  and  $2.5 \pm 0.7 \mu\text{g m}^{-3}$ ,  $n = 6$ ) and ~~S~~summer (mean of  $5.9 \pm 1.8$  and  $2.0 \pm 0.5 \mu\text{g m}^{-3}$ ,  $n = 5$ ). Similar seasonal variation was also reported in a previous study (Zhou et al., 2012). When converted to the mass concentrations, the OC and EC contents were significantly ( $p < 0.01$ ) higher in ~~W~~winter (mean of  $170 \pm 49$  and  $50 \pm 8 \mu\text{g g}^{-1}$ ,  $n = 6$ ) than in other seasons (mean of  $71 \pm 18$  and  $25 \pm 7.3 \mu\text{g g}^{-1}$ ,  $n = 17$ ) (Table S1). Since EC contents were closely correlated to OC ( $r^2 = 0.89$ ,  $p < 0.001$ ), we discussed ~~ed~~ only EC contents in the following as an indicator for the source of PM, because EC is a significant pollutant of combustion source that is not readily modified by secondary processes in the atmosphere.

FIGURE 1

### 3.2 Seasonal variation of mercury concentration and isotopic composition

PM<sub>2.5</sub>-Hg volumetric concentrations and isotopic compositions ~~are~~were shown in Table S1. In general, the PM<sub>2.5</sub>-Hg concentrations ranged from 11 to 310  $\text{pg m}^{-3}$ , with an average value of  $90 \pm 80 \text{pg m}^{-3}$ . These values were comparable to those reported at a rural site of Beijing ( $98 \pm 113 \text{pg m}^{-3}$ ) (Zhang et al., 2013b), indoor PM<sub>2.5</sub> of Guangzhou ( $104 \text{pg m}^{-3}$ ) (Huang et al., 2012) and several southeastern coastal cities ( $141 \pm 128 \text{pg m}^{-3}$ ) of China (Xu et al., 2013), but they were lower than ~~th~~ose reported values for Guiyang ( $368 \pm 676 \text{pg m}^{-3}$ ) of China (Fu et al., 2011). From a global perspective, our PM<sub>2.5</sub>-Hg contents were much higher than those reported for urban areas

of other countries such as Seoul in South Korea ( $23.9 \pm 19.6 \text{ pg m}^{-3}$ ) (Kim et al., 2009), Goteborg  
 275 in Sweden ( $12.5 \pm 5.9 \text{ pg m}^{-3}$ ) (Li et al., 2008) and Detroit in USA ( $20.8 \pm 30.0 \text{ pg m}^{-3}$ ) (Liu et  
 al., 2007). The averaged PM<sub>2.5</sub>-Hg values showed an evident seasonal variation, with relatively  
 higher value in ~~W~~winter ( $140 \pm 99 \text{ pg m}^{-3}$ ) and lower in ~~S~~summer ( $22 \pm 8.2 \text{ pg m}^{-3}$ ) (see Figs. 1  
 and 2). Previous studies also reported similar variation for Hg ~~el~~oad~~ments~~ in atmospheric  
 particles in Beijing (Wang et al., 2006; Schleicher et al., 2015), for example, the highest value of  
 280  $2.130 \pm 420 \text{ pg m}^{-3}$  was found in ~~W~~winter 2004 while lower values generally reported in  
~~S~~summer (Wang et al., 2006; Schleicher et al., 2015).

FIGURE 2

Seasonal variations were also observed for Hg isotopic compositions (see Figs. 1, ~~Fig. and~~ 2  
 and Table S1). The  $\delta^{202}\text{Hg}$  values ranged from  $-2.18 \text{ ‰}$  to  $0.51 \text{ ‰}$  (average  $-0.71 \pm 0.58 \text{ ‰}$ ,  
 285 1SD,  $n = 23$ ), with the lowest value of  $-2.18 \text{ ‰}$  found on 29 Jun 2014 (in ~~S~~summer) whereas the  
 highest of  $0.51 \text{ ‰}$  on 30 Sep 2013 (in ~~A~~autumn). Interestingly, all samples displayed a large  
 $\Delta^{199}\text{Hg}$  variation from  $-0.53 \text{ ‰}$  to  $0.57 \text{ ‰}$  (mean of  $0.05 \pm 0.29 \text{ ‰}$ ). Unlike  $\delta^{202}\text{Hg}$ , the lowest  
 $\Delta^{199}\text{Hg}$  value ( $-0.53 \text{ ‰}$ ) was found in ~~A~~autumn (on 30 Sep 2013), whereas the highest value  
 ( $0.57 \text{ ‰}$ ) was observed in ~~S~~spring (23 Apr 2014). Positive even-MIF of Hg isotope was also  
 290 determined in all PM<sub>2.5</sub>-Hg, with  $\Delta^{200}\text{Hg}$  ranging from  $0.02 \text{ ‰}$  to  $0.17 \text{ ‰}$ , averaging  $0.09 \pm$   
 $0.04 \text{ ‰}$  (Table S1). ~~Threewe~~ previous studies reported negative  $\delta^{202}\text{Hg}$  (from  ~~$-13.4871 \text{ ‰}$~~  to  
 $-0.12 \text{ ‰}$ ) but significantly positive  $\Delta^{199}\text{Hg}$  (from  ~~$-0.316 \text{ ‰}$~~  to  $1.36 \text{ ‰}$ ) for atmospheric particles  
 (Rolison et al., 2013; Huang et al., 2015; Das et al., 2016).

### 3.3 Mercury content and isotope ratios in potential source materials

295 ~~These data were~~As showed in Table S2, ~~The~~ Hg concentrations of the potential source materials  
 ranged widely from  $0.35$  to  $7.747 \text{ ng g}^{-1}$ , with an exceptionally high value of  $10.800 \text{ ng g}^{-1}$  for  
 the sintering dust collected by the electrostatic precipitator in a smelting plant. Though the topsoil

and road dust samples generally displayed relatively lower Hg concentrations (e.g. 23 to 408 ng g<sup>-1</sup>, Table S2), the topsoil collected from Beihai Park in 2<sup>nd</sup> ring of Beijing had an exceptionally high Hg content of 7.747 ng g<sup>-1</sup>. To be noted, these data were comparable to the mass-based Hg concentrations (150 to 2.200 ng g<sup>-1</sup> with a mean value of 720 ng g<sup>-1</sup>) for the 23 PM<sub>2.5</sub> samples (Table S1).

The potential source materials also had a large variation of Hg isotope compositions (Figs. 2; Fig. and 3 and Table S2), with  $\delta^{202}\text{Hg}$  ranging from -2.67 ‰ to 0.62 ‰ (average  $-0.98 \pm 0.79$  ‰, 1SD,  $n = 30$ ), while  $\Delta^{199}\text{Hg}$  ranged from -0.27 ‰ to 0.18 ‰ (mean  $-0.03 \pm 0.11$  ‰), and  $\Delta^{200}\text{Hg}$  values from -0.04 ‰ to 0.11 ‰ (mean  $0.02 \pm 0.04$  ‰).

FIGURE 3

## 4 Discussion

Previous studies demonstrated that coal combustion, cement plant and non-ferrous metal smelting were main sources of Hg in the atmosphere (Streets et al., 2005; Zhang et al., 2015), contributing about 47, 18.5 and 17.5 % of total anthropogenically-emitted Hg in China, respectively (Zhang et al., 2015). In particular, special events such as large-scale biomass burning in Autumn and excessive coal combustion in the Winter heating season might also have overprinted the concentration of PM<sub>2.5</sub>-Hg and its isotope composition. In addition to the possible direct emission from the above anthropogenic sources, atmospheric processes may have impacted the PM<sub>2.5</sub>-Hg isotopic composition, particularly during the long-range transportation of PM<sub>2.5</sub>-Hg (thus long residence time of about a few days to weeks) in the atmosphere (Lin et al., 2007). These potential sources and possible process effects are discussed in the following sections.

### 4.1 Evidence for strong anthropogenic contribution

Anthropogenic emission as the main PM<sub>2.5</sub>-Hg contributing sources was evidenced by the enrichment factor (EF) of Hg (and other metals), which was a commonly-used geochemical

indicator for quantifying the enrichment/depletion of a targeted element in environmental samples (Gao et al., 2002; Song et al., 2012; Chen et al., 2014; Mbengue et al., 2014; Lin et al., 2015b). The EF of a given element was calculated using a double normalization (to the less reactive/insoluble element Al here) and the upper continental crust (UCC) (Rudnick and Gao, 2003) was chosen as the reference (see detailed in Supporting Information). Al is well adapted to this normalization as it has usually no anthropogenic origin and is not readily modified by secondary processes in the atmosphere, and thus was widely used for enrichment calculation in atmospheric pollution studies (Gao et al., 2002; Waheed et al., 2011; Mbengue et al., 2014; Lin et al., 2015b). The calculated results showed (Table S4) high EF(Hg) values for the 14 PM<sub>2.5</sub> samples, ranged from 66 to 424 with an average value of  $228 \pm 134$  (1SD,  $n = 14$ ), indicating that PM<sub>2.5</sub>-Hg pollution was serious (characterized by significant Hg enrichment) in Beijing. As a TE, Hg concentration was generally low in natural terrestrial reservoirs (e.g. 50 ppb in UCC) (Rudnick and Gao, 2003). Similar to the UCC, the topsoil was also mainly composed of aluminosilicates with relatively low Hg concentrations (Table ~~S4~~S2). Thus, high EF(Hg) values probably implied a strong anthropogenic contribution to Hg in PM<sub>2.5</sub>. This could be confirmed by very high EF(Hg) values (up to 226,000, Table S4) determined, for example, in three potential source materials collected from the smelting plant. The high EF(Hg)s also emphasize the importance of studying toxic metals such as Hg (and other heavy metals) in atmospheric particles while accessing the potential threat of hazes on human health.

The strong anthropogenic contribution may be~~was~~ also supported by the relationships between Hg and other particulate components in PM<sub>2.5</sub>. ~~Figures~~Fig. 4a and 4b showed very good correlations between PM<sub>2.5</sub>-Hg concentration and the volumetric concentrations of PM<sub>2.5</sub> and EC, with correlation coefficient ( $r^2$ ) of 0.40, and 0.80, respectively. It is well known that atmospheric pollution due to the high concentrations of PM<sub>2.5</sub> and EC mainly result~~sed~~ed from anthropogenic

emissions (Gao et al., 2015; Lin et al., 2015b). PM<sub>2.5</sub>-Hg also displayed linear relationships with trace metals. Figures 4c and 4d showed the examples with Co and Zn ( $r^2$  of 0.74 and 0.44, respectively,  $p < 0.01$ ). High metal contents in atmospheric particles are generally related to human activities. For example, combustion and smelting release large amount of TEs into the atmosphere (Xu et al., 2004; Nzihou and Stanmore, 2013). The fact that all PM<sub>2.5</sub> samples displayed very high EFs for “anthrophile” elements (elements were generally enriched by human activities) (Chen et al., 2014) such as Cd, Cu, Pb, Sb, Se, Tl and Zn (ranging from 10 to 20,869, Table S4) clearly illustrated the anthropogenic contribution to these elements in PM<sub>2.5</sub>. As a result, fine atmospheric particles in Beijing were ~~large~~strongly enriched in Hg and other TEs, which was likely caused by ~~elevate~~centralized ~~human~~anthropogenic activities.

FIGURE 4

## 4.2 Isotopic overprint of potential anthropogenic Hg sources

Hg isotopic signatures ~~may~~ further indicated that human activities contributed to ~~a~~ large proportion of PM<sub>2.5</sub>-Hg. In this study, all samples displayed a large variation of  $\delta^{202}\text{Hg}$  (from -2.18 ‰ to 0.51 ‰, Table S1), ~~consistent with~~similar to those (from -2.67 ‰ to 0.62 ‰, Table S2) determined for the particulate materials from potential sources such as coal combustion (averaged  $-1.10 \pm 1.20$  ‰, 1SD,  $n = 8$ ), smelting ( $-0.87 \pm 0.82$  ‰, 1SD,  $n = 6$ ) and cement plants ( $-1.42 \pm 0.36$  ‰, 1SD,  $n = 10$ ), as demonstrated in Figs. 2 and ~~Fig.~~3. This similarity ~~likely might~~ indicated the emission of these anthropogenic sources as the possible contributing sources of PM<sub>2.5</sub>-Hg. Though the anthropogenic samples collected in this study could not cover the whole spectrum of anthropogenic contributions, previous studies reported similar  $\delta^{202}\text{Hg}$  range (from ~~-23.648~~ ‰ to 0.77 ‰) for potential source materials worldwide (Biswas et al., 2008; Estrade et al., 2011; Sun et al., 2013; Sun et al., 2014; Yin et al., 2014; Wang et al., 2015b; Das et al., 2016). In fact, most PM<sub>2.5</sub> samples possessed  $\Delta^{199}\text{Hg}$  similar to those determined in above-mentioned

particulate materials ( $-0.27\text{ ‰}$  to  $0.04\text{ ‰}$ , Figs. 2 and Fig. 3) in this study, confirms suggesting these anthropogenic emission as the major sources of  $\text{PM}_{2.5}\text{-Hg}$ .

Interestingly, Hg isotope compositions were correlated well with the elements such as Co, Ni and Sb (here mass ratio of the element/Al was used to cancel out the dilution effect by major mineral phase), as shown in Figs. 5a and 5b for the example of Co. These correlations might indicate that Hg and some other metals had common provenance, likely from anthropogenic combustion, as discussed above. A careful investigation of the correlations amongst metal elements, along with Hg isotopic data, further indicated anthropogenic source category. The principal component analysis (PCA) of Hg and other TEs (see Table S5) demonstrated likely that four factors might ~~controlled~~ the variance of the entire data set over four seasons. In accordance with the above discussion, these four factors were likely a mixture of coal combustion and nonferrous metal smelting (characterized by Hg had relatively high contents of loading, with other elements as Pb, Rb, Se, Zn, Tl, Cr and Cd), cement production on Factor 1 (about 39 %, Table S5), a mixture of coal combustion and nonferrous metal smelting, and with elements (enriched in Ca, Sr, Al and Mg), on Factor 2 (about 24 %), a source from cement production, but low loading on Factor 3 (traffic emission, 23 %) and Factor 4 (biomass burning, with their contributions estimated to be about 39 %, 24 %, 23 %, and 7 % (Table S5).

#### FIGURE 5

As a result, the Hg isotopic compositions may potentially ~~suggested~~ that coal combustion, smelting and cement plants were major sources of  $\text{PM}_{2.5}\text{-Hg}$ . The higher  $\text{EF}(\text{Hg})$  values and the detail investigation of elemental data supported this hypothesis. However, without careful characterization of potential sources, we we are unable to quantify the contribution from each source at this stage. Noteworthily, Figs. ~~ure~~ 6a and 6b showed that  $\delta^{202}\text{Hg}$  increased with  $\text{EF}(\text{Hg})$  ( $r^2 = 0.55$ ), whereas  $\Delta^{199}\text{Hg}$  decreased with  $\text{EF}(\text{Hg})$  ( $r^2 = 0.36$ ). These correlations may could

suggest that the large isotope variation of PM<sub>2.5</sub>-Hg might be mainly controlled by two endmembers with contrasting  $\delta^{202}\text{Hg}$  and  $\Delta^{199}\text{Hg}$ . The end  $\Delta^{199}\text{Hg}$  values of correlations, however, could not be explained by the above defined anthropogenic sources, which generally had insignificant odd-MIF. The contribution from additional sources or possible processes was thus needed to explain the extreme  $\Delta^{199}\text{Hg}$  values. Accordingly, the  $\delta^{202}\text{Hg}$  and  $\Delta^{199}\text{Hg}$  exhibited contrast relationships with the EC/Al ratios (Figs. 5c and 5d). As relatively higher EC contents were generally derived from coal combustion and biomass burning (Zhang et al., 2008; Saleh et al., 2014), these two non-point emission sources might account for the  $\Delta^{199}\text{Hg}$  end values.

FIGURE 6

#### 4.3 Dominant contribution from coal combustion in Wwinter

High EC content in Wwinter PM<sub>2.5</sub> might result from additional coal combustion during the heating season, when coal was widely used in both suburban communities and rural individual families (Wang et al., 2006; Song et al., 2007; Schleicher et al., 2015). This additional coal burning ~~w~~could considerably increase Hg and EC emission, explaining the relatively higher PM<sub>2.5</sub>-Hg (1340 ng g<sup>-1</sup>,  $p < 0.01$ ) and carbon contents (Table S1). In this study, both  $\delta^{202}\text{Hg}$  (mean  $-0.71 \pm 0.37$  ‰) and  $\Delta^{199}\text{Hg}$  ( $-0.08 \pm 0.11$  ‰, 1SD,  $n = 6$ ) for Wwinter PM<sub>2.5</sub> samples were consistent with those in coals (average  $\delta^{202}\text{Hg}$  values of  $-0.73 \pm 0.33$  ‰ and  $\Delta^{199}\text{Hg}$  of  $-0.02 \pm 0.08$  ‰, respectively) from northeastern China (Yin et al., 2014), possibly supporting the above conclusion. Beside EC contents, Zn/Al ratio may provide information for PM from industrial (e.g. metal smelting) emission sources. In Zn/Al vs. EC diagram (Fig. 7), all Wwinter samples displayed a linear relationship ( $r^2 = 0.94$ ) different from the samples of other seasons. Compared to the data of other seasons, the volumetric EC concentrations varied greatly in winter, whereas the Zn/Al ratio of the same season remained stable. The relatively lower slope signified a rapid EC increasing accompanying with a quasi-constant Zn/Al ratio. This variation may be

derived from the emission of coal burning that is characterized by high carbon content but relatively low Zn concentration (Nzihou and Stanmore, 2013; Saleh et al., 2014). This highlighted again the dominated contribution from coal combustion. The backward trajectory calculated by a Hybrid Single Particle Lagrangian Integrated Trajectory (HYSPLIT) model (Fig. S1) showed the dominant northwestern wind in ~~W~~winter. In this case, the fact that the transported air masses were derived from the background region (less populated and underdeveloped) could ~~expotentially~~ explain both the lower volume-based concentrationseontents of Hg, TEs (e.g. Zn) and EC (Fig. 7) and the higher mass-based contents of Hg, TEs (e.g. Zn) and EC (Table S1) in some ~~W~~winter samples. The dilution by this background air could also explain the comparable EC content in ~~W~~winter and ~~A~~autumn (Figs. 1 and ~~Fig.~~ 7).

FIGURE 7

#### 4.4 Important biomass burning input in ~~A~~autumn

Biomass burning that ~~largelyoften~~ occurred in north China might be the cause of relatively higher EC volumetric concentratioents in ~~A~~autumn PM<sub>2.5</sub>. The HYSPLIT model (Fig. S2) showed that, unlike the ~~W~~winter PM<sub>2.5</sub>, the samples collected in ~~A~~autumn were strongly impacted by northward wind. Biomass burning that occurred in ~~the southern region tof~~ Beijing during ~~A~~autumn harvesting season could transport a large amount of EC (and Hg) to Beijing, adding a potential source to PM<sub>2.5</sub>-Hg. Though biomass burning is not an important source in an annual time scale (from PCA estimation), it may display major contribution in a shot time period in autumn. Previous studies showed that this source ~~mightay~~ account for 20 to 60 % of PM<sub>2.5</sub> in Beijing during peak days of biomass burning (Zheng et al., 2005a; Zheng et al., 2005b). Isotopically, PM<sub>2.5</sub> collected in the ~~southern~~-arriving air masses from south were characterized by significantly negative  $\Delta^{199}\text{Hg}$  values (from -0.54 ‰ to -0.29 ‰), whereas samples collected in the northwestern wind event exhibited  $\Delta^{199}\text{Hg}$  values close to zero or slightly positive, indicating



a negative  $\Delta^{199}\text{Hg}$  signature in biomass burning emission Hg. Our newly obtained data on Hg isotopes from biomass burning showed negative  $\Delta^{199}\text{Hg}$  (that will be published in the future), supporting our ~~suggestion~~hypothesis. Moreover, prior studies have generally reported negative  $\Delta^{199}\text{Hg}$  values for biological samples including foliage (about  $-0.37\text{ ‰}$ )~~and~~, rice stem (about  $-0.37\text{ ‰}$ ) and litter (about  $-0.44\text{ ‰}$ ) (Demers et al., 2013; Yin et al., 2013; Jiskra et al., 2015), even down to  $-1.00\text{ ‰}$  for some lichen (Carignan et al., 2009). The odd-MIF signature may be conserved during complete biomass burning as this process would not produce any mass-independent fractionation (Sun et al., 2014; Huang et al., 2015).

Interestingly, the ~~A~~autumn  $\text{PM}_{2.5}$  had a Zn/Al versus EC correlation ( $r^2 = 0.37$ ) distinctly different from the ~~W~~winter samples, and also from ~~S~~spring and ~~S~~summer samples (Fig. 7). This difference may imply another carbon-enriched contribution in ~~A~~autumn other than coal combustion. In fact, the largely occurring ~~biomass~~ biomass burning in the ~~S~~south (Hebei and Henan provinces) may lead to the EC content (volume-based)~~enrichment~~ increasing in ~~A~~autumn air mass~~particles~~. Thus, the high EC air mass~~enriched particle~~ input from biomass burning could explain the different trend which ~~displayed~~displayed by ~~A~~autumn  $\text{PM}_{2.5}$ , while the above-discussed contribution from industries (mainly smelting) could explain the higher Zn (at a given EC content) in ~~S~~summer samples. Though most samples with high EC could result from biomass burning, two ~~A~~autumn samples displayed relatively low EC could be caused by the dilution from northern background air mass (Fig. S2), as demonstrated by the HYSPLIT model.

#### 4.5 Contribution from long-range transported $\text{PM}_{2.5}$ -Hg

Besides the dominant contribution from local or regional emissions, long-range transported Hg might impact on  $\text{PM}_{2.5}$ -Hg in Beijing (Han et al., 2015; Wang et al., 2015a). As shown in Figs. 1 ~~and~~, Fig. 2 and Table S1, the six ~~S~~spring  $\text{PM}_{2.5}$  samples and the one early ~~S~~summer sample had much higher  $\Delta^{199}\text{Hg}$  (from  $0.14\text{ ‰}$  to  $0.57\text{ ‰}$ , mean of  $0.39 \pm 0.16\text{ ‰}$ , 1SD,  $n = 7$ ) and  $\Delta^{200}\text{Hg}$

values (from 0.08 ‰ to 0.12 ‰, mean of  $0.10 \pm 0.01$  ‰, 1SD,  $n = 7$ ). These high values could not be explained by the above defined anthropogenic contributors having generally negative or close to zero MIF (Figs. 2 and ~~Fig.~~ 3), yet another contribution or fractionation during atmospheric processing is needed to explain all data set. The long-range transported PM<sub>2.5</sub>-Hg may be such contributor in addition to the direct local or regional anthropogenic emission (Han et al., 2015; Wang et al., 2015a).

The HYSPLIT calculation showed that the arriving air masses of these samples generally came from a long distance (mainly from the North and Northwest, Figs. S3 and ~~Fig.~~ S4), suggesting a contribution of long-range transportation, given the residence time of PM<sub>2.5</sub>-Hg (days to weeks) (Lin et al., 2007). Unfortunately, we were not able to collect and analyze the typical long-range transported Hg in this study. Previous studies have reported that long-range transported Hg might exhibit relatively higher  $\Delta^{199}\text{Hg}$  (up to 1.16 ‰) due to the extensive photolysis reaction (Chen et al., 2012; Wang et al., 2015b; Yuan et al., 2015). In fact, the samples with significantly positive  $\Delta^{199}\text{Hg}$  were collected during a period (at least 3 days before sampling) with long daily sunshine (> 8.8 hrs) for Beijing and adjacent regions (Table S1). Such climate condition might be favorable for photo-reduction of atmospheric  $\text{Hg}^{2+}$ , which preferentially enriches odd isotopes in solution or aerosols. The fact that the background TSP sample from the Yanqing region had higher  $\Delta^{199}\text{Hg}$  (0.18 ‰, Table S2) than PM<sub>2.5</sub> samples collected at the same time in Centre Beijing might suggest higher odd-MIF values for long-range transported Hg, since the local Hg emission is very limited in this rural area. Moreover, the higher  $\Delta^{200}\text{Hg}$  values (from 0.08 ‰ to 0.12 ‰, Table S1) determined in these samples may also indicate the contribution of long-range transportation, since even-MIF was thought to be a conservative indicator of upper atmosphere chemistry (Chen et al., 2012; Cai and Chen, 2016). Since the locally emitted PM<sub>2.5</sub>-Hg (having lower or close to zero  $\Delta^{199}\text{Hg}$  and  $\Delta^{200}\text{Hg}$ ) mainly resided and accumulated in the atmosphere

boundary layer (generally < 1000 m), and thus could be largely scavenged by precipitation (Yuan et al., 2015), the higher  $\Delta^{199}\text{Hg}$  values (from 0.06 ‰ to 0.14 ‰, see Table S1) for  $\text{PM}_{2.5}$  sampled after precipitation event supported the contribution of long-range transport to  $\text{PM}_{2.5}\text{-Hg}$ . Finally, as the background  ~~$\text{PM}_{2.5}$  fine particles with little input from anthropogenic activities are likely characterized by low contents of~~are generally depleted in trace metals (such as Zn) and organic matter\* (Song et al., 2007; Zhou et al., 2012), the long-range transport contribution could also explain  $\text{PM}_{2.5}$  samples with relatively low EC content and Zn/Al ratio in Fig. 7.

#### 4.6 Possible processes effects on transported $\text{PM}_{2.5}\text{-Hg}$

The atmospheric processes such as secondary aerosol production, adsorption (and desorption) and redox reactions may induce a redistribution of Hg among GEM, RGM and PBM, and simultaneously cause fractionate Hg isotopesie fractionation of Hg in  $\text{PM}_{2.5}$ , possibly indueresulting in a difference of Hg isotopic composition between  $\text{PM}_{2.5}$  and source materials.

Up to now, no Hg isotopic fractionation wais rarely reported for Hg redistribution and secondary aerosol formation in the atmosphere. However, the fact that the contents of secondary organic carbon (see detailed calculation in Supporting Information) had no correlation ( $r^2 < 0.09$ ,  $p > 0.18$ )

with either  $\delta^{202}\text{Hg}$  or  $\Delta^{199}\text{Hg}$  may imply a limited effect of such processes. Previous studies have showed limited adsorption of  $\text{Hg}^0$  on atmospheric particles (Seigneur et al., 1998). More importantly, according to the experiments conductedin under aqueous conditions, the adsorption/desorption and precipitation of  $\text{Hg}^{2+}$  wouldmay notonly induce very smallsignificant MIF of Hg isotopes (Jiskra et al., 2012; Smith et al., 2015), in contrast with our observation.

Therefore, the effect of adsorption or precipitation was probably limited on MIF of isotopic composition of  $\text{PM}_{2.5}\text{-Hg}$ . In this study, all 23  $\text{PM}_{2.5}$  samples defined a straight line in Fig. 2 with a  $\Delta^{199}\text{Hg}/\Delta^{201}\text{Hg}$  slope of about 1.1, consistent with the results of  $\text{Hg}^{2+}$  photoreduction experiment (Bergquist and Blum, 2007; Zheng and Hintelmann, 2009), suggesting a possible

effect of photochemical reduction during PM<sub>2.5</sub>-Hg transport. ~~Eventually~~Potentially, the enrichment of odd isotopes in reactants (here particles) during these processes can explain the positive  $\Delta^{199}\text{Hg}$  in ~~s~~Spring and ~~S~~summer samples. However, most samples collected in ~~a~~Autumn and ~~W~~winter displayed significant negative  $\Delta^{199}\text{Hg}$  values (down to  $-0.54\text{‰}$ , Figs. 1, 2, 4 and 5, and Table S1). Therefore, the photoreduction of divalent Hg species can~~no~~t explain the total variation of Hg isotope ratios determined in all samples, especially the odd-MIF. Moreover, the inverse relationship ( $r^2 = 0.45$ ,  $p < 0.01$ ) between  $\Delta^{199}\text{Hg}$  and  $\delta^{202}\text{Hg}$  was inconsistent with the experimental results of photoreduction that generally showed positive correlation for the residual Hg pool (here particles) (Bergquist and Blum, 2007; Zheng and Hintelmann, 2009). All these arguments suggest that these processes ~~may~~are not ~~be~~ the major mechanism to produce large even contrasting Hg isotope variation in Hg-enriched fine atmospheric particles. ~~Up to now~~A recent study reported Hg, ~~no~~ isotopic fractionation ~~during Hg<sup>0</sup> was reported for the~~ oxidation showed a positive relationship between  $\Delta^{199}\text{Hg}$  and  $\delta^{202}\text{Hg}$  for Cl-initiated oxidation but a negative relationship for Br-initiated oxidation. Though our PM<sub>2.5</sub> samples displayed also a decrease of  $\Delta^{199}\text{Hg}$  with  $\delta^{202}\text{Hg}$  (Fig. 2), similar to the Br-initiated oxidation, they had a  $\Delta^{199}\text{Hg}/\Delta^{201}\text{Hg}$  ratio (1.1) lower than that ( $1.6 \pm 0.3$ ) of Br-initiated oxidation, and much lower than that ( $1.9 \pm 0.2$ ) of Cl-initiated oxidation (Sun et al., 2016). Though we cannot exclude the contribution of Hg<sup>0</sup> oxidation to PM<sub>2.5</sub>-Hg, given the fact that halogen-initiated oxidation would not largely occur in in-land atmosphere boundary layer, oxidation would not be a dominated controlling factor causing the seasonal variation of Hg isotopes in PM<sub>2.5</sub> particles.~~of gaseous elemental Hg in the atmosphere. According to the above discussion and considering the lack of direct evidence and/or experiments on Hg isotope fractionation during atmospheric Hg transformation,~~ ~~W~~we thus suggest that the contributions from different sources ~~may be~~ is the

~~betterst~~ scenario to explain the seasonal variation of Hg isotopic compositions we measured for the PM<sub>2.5</sub> in our fine particle samples.

## 5 Conclusions

In summary, our study reported, for the first time, large range and seasonal variations of both MDF and MIF of Hg isotopes in haze particulate (PM<sub>2.5</sub>) samples collected ~~in~~from Beijing. The strong anthropogenic input to PM<sub>2.5</sub>-Hg was evidenced by the high enrichment of Hg (and other “anthrophile” elements) and Hg isotopic compositions. Our data showed that mixing of variable contributing sources ~~rather than atmospheric processes~~ likely triggered the seasonal variation of Hg isotopic ratio. Major potential contributing sources were identified by coupling Hg isotope data with other geochemical parameters (e.g. PM<sub>2.5</sub>, EC, element concentrations) and meteorological data, and showed variable contribution in four seasons, with continuous industrial input (e.g. smelting, cement production and coal combustion) over the year and predominated contributions s from coal combustion and biomass burning in ~~W~~winter and ~~A~~autumn, respectively.

In addition to the local and/or regional emissions, ~~the~~ long-range transported Hg was probably also a contributor to PM<sub>2.5</sub>-Hg, accounting for the relatively higher odd-MIF particularly found in ~~S~~spring and early ~~S~~summer. This ~~work study~~ demonstrated the potential ~~usefulness~~ of isotopes for ~~directly~~ tracing the sources of heavy metals and their vectors in the atmosphere, and stressed the importance of studying toxic metals such as Hg (and other heavy metals) in atmospheric particles while accessing the potential threat of hazes on human health. ~~This work stimulates also further studies on Hg isotopic composition of the specie-specific Hg that help to characterize the effect of Hg transformation processes on isotopic signature of PM<sub>2.5</sub>-Hg in a local and global scales.~~

560 *Acknowledgments.* We thank Dr. Wiederhold of ETH Zurich and two other anonymous reviewers  
for their constructive comments and suggestions. This study was financially supported by ~~Natural~~  
~~Science Foundation of China (No. 41273023, U1301231, 41561134017),~~ National “973”  
Program (No. 2013CB430001), “Strategic Priority Research Program” (No. XDB05030302 and  
XDB05030304), Natural Science Foundation of China (No. 41273023, U1301231, 41561134017,  
565 41173024) and “Hundred Talents” project of the Chinese Academy of Sciences; Q. Huang also  
thanks the~~and~~ China Postdoctoral Science Foundation (No. 2014M550472).

## References

- Bergquist, B. A., and Blum, J. D.: Mass-dependent and -independent fractionation of Hg isotopes by photoreduction in aquatic systems, *Science*, 318, 417-420, 2007.
- 570 Biswas, A., Blum, J. D., Bergquist, B. A., Keeler, G. J., and Xie, Z. Q.: Natural mercury isotope variation in coal deposits and organic soils, *Environ. Sci. Technol.*, 42, 8303-8309, 2008.
- Blum, J. D., and Bergquist, B. A.: Reporting of variations in the natural isotopic composition of mercury, *Anal. Bioanal. Chem.*, 388, 353-359, 2007.
- Blum, J. D., Sherman, L. S., and Johnson, M. W.: Mercury isotopes in earth and environmental  
575 sciences, *Annual Review of Earth and Planetary Sciences*, 42, 249-269, 2014.
- Buchachenko, A. L.: Mercury isotope effects in the environmental chemistry and biochemistry of mercury-containing compounds, *Russian Chemical Reviews*, 78, 319-328, 2009.
- Cai, H., and Chen, J.: Mass-independent fractionation of even mercury isotopes, *Science Bulletin*, 61, 116-124, 10.1007/s11434-015-0968-8, 2016.
- 580 Carignan, J., Estrade, N., Sonke, J. E., and Donard, O. F. X.: Odd isotope deficits in atmospheric Hg measured in Lichens, *Environ. Sci. Technol.*, 43, 5660-5664, doi: 10.1021/Es900578v, 2009.
- Chen, J. B., Hintelmann, H., and Dimock, B.: Chromatographic pre-concentration of Hg from dilute aqueous solutions for isotopic measurement by MC-ICP-MS, *J. Anal. At. Spectrom.*, 25, 1402-1409, 2010.
- 585 Chen, J. B., Hintelmann, H., Feng, X. B., and Dimock, B.: Unusual fractionation of both odd and even mercury isotopes in precipitation from Peterborough, ON, Canada, *Geochim. Cosmochim. Acta*, 90, 33-46, 2012.

- Chen, J. B., Gaillardet, J., Bouchez, J., Louvat, P., and Wang, Y. N.: Anthropophile elements in  
590 river sediments: Overview from the Seine River, France, *Geochem. Geophys. Geosyst.*, 15,  
4526-4546, 2014.
- Das, R., Wang, X., Khezri, B., Webster, R. D., Sikdar, P. K., and Datta, S.: Mercury isotopes of  
atmospheric particle bound mercury for source apportionment study in urban Kolkata, India,  
*Elementa: Science of the Anthropocene*, 4, 000098, doi: 10.12952/journal.elementa.000098,  
595 2016.
- Demers, J. D., Blum, J. D., and Zak, D. R.: Mercury isotopes in a forested ecosystem:  
Implications for air-surface exchange dynamics and the global mercury cycle, *Global  
Biogeochem. Cycles*, 27, 222-238, 2013.
- Demers, J. D., Sherman, L. S., Blum, J. D., Marsik, F. J., and Dvonch, J. T.: Coupling  
600 atmospheric mercury isotope ratios and meteorology to identify sources of mercury impacting  
a coastal urban - industrial region near Pensacola, Florida, USA, *Global Biogeochem Cy*, 29,  
1689-1705, 2015a.
- Demers, J. D., Sherman, L. S., Blum, J. D., Marsik, F. J., and Dvonch, J. T.: Coupling  
atmospheric mercury isotope ratios and meteorology to identify sources of mercury impacting  
605 a coastal urban-industrial region near Pensacola, Florida, USA, *Global Biogeochem. Cycles*,  
29, 1689-1705, 10.1002/2015GB005146, 2015b.
- Eiler, J. M., Bergquist, B., Bourg, I., Cartigny, P., Farquhar, J., Gagnon, A., Guo, W., Halevy, I.,  
Hofmann, A., Larson, T. E., Levin, N., Schauble, E. A., and Stolper, D.: Frontiers of stable  
isotope geoscience, *Chem. Geol.*, 372, 119-143,  
610 <http://dx.doi.org/10.1016/j.chemgeo.2014.02.006>, 2014.
- Enrico, M., Roux, G. L., Maruszczak, N., Heimbürger, L.-E., Claustres, A., Fu, X., Sun, R., and  
Sonke, J. E.: Atmospheric Mercury Transfer to Peat Bogs Dominated by Gaseous Elemental  
Mercury Dry Deposition, *Environ. Sci. Technol.*, 50, 2405-2412, 10.1021/acs.est.5b06058,  
2016.
- Estrade, N., Carignan, J., and Donard, O. F. X.: Tracing and quantifying anthropogenic mercury  
615 sources in soils of northern France using isotopic signatures, *Environ. Sci. Technol.*, 45, 1235-  
1242, 2011.

- Feng, X. B., Foucher, D., Hintelmann, H., Yan, H. Y., He, T. R., and Qiu, G. L.: Tracing mercury contamination sources in sediments using mercury isotope compositions, *Environ. Sci. Technol.*, 44, 3363-3368, 2010.
- Fu, X., Maruszczak, N., Wang, X., Gheusi, F., and Sonke, J. E.: Isotopic Composition of Gaseous Elemental Mercury in the Free Troposphere of the Pic du Midi Observatory, France, *Environ. Sci. Technol.*, 50, 5641-5650, 10.1021/acs.est.6b00033, 2016.
- Fu, X. W., Feng, X. B., Zhu, W. Z., Zheng, W., Wang, S. F., and Lu, J. Y.: Total particulate and reactive gaseous mercury in ambient air on the eastern slope of the Mt. Gongga area, China, *Appl. Geochem.*, 23, 408-418, 2008.
- Fu, X. W., Feng, X. B., Qiu, G. L., Shang, L. H., and Zhang, H.: Speciated atmospheric mercury and its potential source in Guiyang, China, *Atmos. Environ.*, 45, 4205-4212, 2011.
- Fu, X. W., Feng, X. B., Sommar, J., and Wang, S. F.: A review of studies on atmospheric mercury in China, *Sci. Total Environ.*, 421, 73-81, doi: 10.1016/j.scitotenv.2011.09.089, 2012.
- Fu, X. W., Heimbürger, L. E., and Sonke, J. E.: Collection of atmospheric gaseous mercury for stable isotope analysis using iodine- and chlorine-impregnated activated carbon traps, *J. Anal. At. Spectrom.*, 29, 841-852, 2014.
- Gao, J., Tian, H., Cheng, K., Lu, L., Zheng, M., Wang, S., Hao, J., Wang, K., Hua, S., Zhu, C., and Wang, Y.: The variation of chemical characteristics of PM<sub>2.5</sub> and PM<sub>10</sub> and formation causes during two haze pollution events in urban Beijing, China, *Atmos. Environ.*, 107, 1-8, doi: 10.1016/j.atmosenv.2015.02.022, 2015.
- Gao, Y., Nelson, E. D., Field, M. P., Ding, Q., Li, H., Sherrell, R. M., Gigliotti, C. L., Van Ry, D. A., Glenn, T. R., and Eisenreich, S. J.: Characterization of atmospheric trace elements on PM<sub>2.5</sub> particulate matter over the New York–New Jersey harbor estuary, *Atmos. Environ.*, 36, 1077-1086, [http://dx.doi.org/10.1016/S1352-2310\(01\)00381-8](http://dx.doi.org/10.1016/S1352-2310(01)00381-8), 2002.
- Ghosh, S., Schauble, E. A., Lacrampe Couloume, G., Blum, J. D., and Bergquist, B. A.: Estimation of nuclear volume dependent fractionation of mercury isotopes in equilibrium liquid–vapor evaporation experiments, *Chem. Geol.*, 336, 5-12, <http://dx.doi.org/10.1016/j.chemgeo.2012.01.008>, 2013.
- Gratz, L. E., Keeler, G. J., Blum, J. D., and Sherman, L. S.: Isotopic composition and fractionation of mercury in Great Lakes precipitation and ambient air, *Environ. Sci. Technol.*, 44, 7764-7770, 2010.



Han, L., Cheng, S., Zhuang, G., Ning, H., Wang, H., Wei, W., and Zhao, X.: The changes and  
650 long-range transport of PM<sub>2.5</sub> in Beijing in the past decade, *Atmos. Environ.*, 110, 186-195,  
doi: 10.1016/j.atmosenv.2015.03.013, 2015.

Hintelmann, H., and Lu, S. Y.: High precision isotope ratio measurements of mercury isotopes in  
cinnabar ores using multi-collector inductively coupled plasma mass spectrometry, *Analyst*,  
128, 635-639, 2003.

655 Hintelmann, H., and Zheng, W.: Tracking geochemical transformations and transport of mercury  
through isotope fractionation, in: *Environmental Chemistry and Toxicology of Mercury*, John  
Wiley & Sons New York, 293-327, 2012.

Huang, M. J., Wang, W., Leung, H. M., Chan, C. Y., Liu, W. K., Wong, M. H., and Cheung, K.  
C.: Mercury levels in road dust and household TSP/PM<sub>2.5</sub> related to concentrations in hair in  
660 Guangzhou, China, *Ecotoxicol. Environ. Saf.*, 81, 27-35, 2012.

Huang, Q., Liu, Y. L., Chen, J. B., Feng, X. B., Huang, W. L., Yuan, S. L., Cai, H. M., and Fu, X.  
W.: An improved dual-stage protocol to pre-concentrate mercury from airborne particles for  
precise isotopic measurement, *J. Anal. At. Spectrom.*, 30, 957-966, 2015.

Huang, R.-J., Zhang, Y., Bozzetti, C., Ho, K.-F., Cao, J.-J., Han, Y., Daellenbach, K. R., Slowik,  
665 J. G., Platt, S. M., and Canonaco, F.: High secondary aerosol contribution to particulate  
pollution during haze events in China, *Nature*, 514, 218-222, 2014.

Jackson, T. A., Muir, D. C. G., and Vincent, W. F.: Historical variations in the stable isotope  
composition of mercury in Arctic lake sediments, *Environ. Sci. Technol.*, 38, 2813-2821, 2004.

Jackson, T. A., Whittle, D. M., Evans, M. S., and Muir, D. C. G.: Evidence for mass-independent  
670 and mass-dependent fractionation of the stable isotopes of mercury by natural processes in  
aquatic ecosystems, *Appl. Geochem.*, 23, 547-571, 2008.

Jackson, T. A., Telmer, K. H., and Muir, D. C. G.: Mass-dependent and mass-independent  
variations in the isotope composition of mercury in cores from lakes polluted by a smelter:  
Effects of smelter emissions, natural processes, and their interactions, *Chem. Geol.*, 352, 27-46,  
675 2013.

Jackson, T. A.: Evidence for mass-independent fractionation of mercury isotopes by microbial  
activities linked to geographically and temporally varying climatic conditions in Arctic and  
subarctic Lakes, *Geomicrobiol. J.*, 32, 799-826, 2015.

Jiskra, M., Wiederhold, J. G., Bourdon, B., and Kretzschmar, R.: Solution speciation controls  
mercury isotope fractionation of Hg(II) sorption to goethite, *Environ. Sci. Technol.*, 46, 6654-  
6662, 2012.

Jiskra, M., Wiederhold, J. G., Skjellberg, U., Kronberg, R.-M., Hajdas, I., and Kretzschmar, R.:  
Mercury Deposition and Re-emission Pathways in Boreal Forest Soils Investigated with Hg  
Isotope Signatures, *Environ. Sci. Technol.*, 49, 7188-7196, 10.1021/acs.est.5b00742, 2015.

Kim, P. R., Han, Y. J., Holsen, T. M., and Yi, S. M.: Atmospheric particulate mercury:  
Concentrations and size distributions, *Atmos. Environ.*, 61, 94-102, 2012.

Kim, S. H., Han, Y. J., Holsen, T. M., and Yi, S. M.: Characteristics of atmospheric speciated  
mercury concentrations (TGM, Hg(II) and Hg(p)) in Seoul, Korea, *Atmos. Environ.*, 43, 3267-  
3274, 2009.

Li, J., Sommar, J., Wangberg, I., Lindqvist, O., and Wei, S. Q.: Short-time variation of mercury  
speciation in the urban of Goteborg during GOTE-2005, *Atmos. Environ.*, 42, 8382-8388,  
2008.

Lin, C. Y., Wang, Z., Chen, W. N., Chang, S. Y., Chou, C. C. K., Sugimoto, N., and Zhao, X.:  
Long-range transport of Asian dust and air pollutants to Taiwan: Observed evidence and model  
simulation, *Atmos. Chem. Phys.*, 7, 423-434, doi: 10.5194/acp-7-423-2007, 2007.

Lin, H., Yuan, D., Lu, B., Huang, S., Sun, L., Zhang, F., and Gao, Y.: Isotopic composition  
analysis of dissolved mercury in seawater with purge and trap preconcentration and a modified  
Hg introduction device for MC-ICP-MS, *J. Anal. At. Spectrom.*, 30, 353-359, doi:  
10.1039/C4JA00242C, 2015a.

Lin, Y.-C., Hsu, S.-C., Chou, C. C. K., Zhang, R., Wu, Y., Kao, S.-J., Luo, L., Huang, C.-H., Lin,  
S.-H., and Huang, Y.-T.: Wintertime haze deterioration in Beijing by industrial pollution  
deduced from trace metal fingerprints and enhanced health risk by heavy metals, *Environ.*  
*Pollut.*, doi: 10.1016/j.envpol.2015.07.044, 2015b.

Liu, B., Keeler, G. J., Dvonch, J. T., Barres, J. A., Lynam, M. M., Marsik, F. J., and Morgan, J.  
T.: Temporal variability of mercury speciation in urban air, *Atmos. Environ.*, 41, 1911-1923,  
2007.

Ma, J., Hintelmann, H., Kirk, J. L., and Muir, D. C. G.: Mercury concentrations and mercury  
isotope composition in lake sediment cores from the vicinity of a metal smelting facility in Flin  
Flon, Manitoba, *Chem. Geol.*, 336, 96-102, 2013.

- 710 Malinovsky, D., Latruwe, K., Moens, L., and Vanhaecke, F.: Experimental study of mass-independence of Hg isotope fractionation during photodecomposition of dissolved methylmercury, *J. Anal. At. Spectrom.*, 25, 950-956, 2010.
- Masbou, J., Point, D., Sonke, J. E., Frappart, F., Perrot, V., Amouroux, D., Richard, P., and Becker, P. R.: Hg stable isotope time trend in ringed seals registers decreasing sea ice cover in  
715 the Alaskan Arctic, *Environ. Sci. Technol.*, 49, 8977-8985, 2015.
- Mbengue, S., Alleman, L. Y., and Flament, P.: Size-distributed metallic elements in submicronic and ultrafine atmospheric particles from urban and industrial areas in northern France, *Atmos. Res.*, 135, 35-47, 10.1016/j.atmosres.2013.08.010, 2014.
- Nzihou, A., and Stanmore, B.: The fate of heavy metals during combustion and gasification of  
720 contaminated biomass: A brief review, *J. Hazard. Mater.*, 256-257, 56-66, doi: 10.1016/j.jhazmat.2013.02.050, 2013.
- Rolison, J. M., Landing, W. M., Luke, W., Cohen, M., and Salters, V. J. M.: Isotopic composition of species-specific atmospheric Hg in a coastal environment, *Chem. Geol.*, 336, 37-49, 2013.
- Rudnick, R., and Gao, S.: Composition of the continental crust, *Treatise on Geochemistry*, 3, 1-  
725 64, 2003.
- Saleh, R., Robinson, E. S., Tkacik, D. S., Ahern, A. T., Liu, S., Aiken, A. C., Sullivan, R. C., Presto, A. A., Dubey, M. K., Yokelson, R. J., Donahue, N. M., and Robinson, A. L.: Brownness of organics in aerosols from biomass burning linked to their black carbon content, *Nature Geosci.*, 7, 647-650, doi: 10.1038/ngeo2220, 2014.
- 730 Schauble, E. A.: Role of nuclear volume in driving equilibrium stable isotope fractionation of mercury, thallium, and other very heavy elements, *Geochim. Cosmochim. Acta*, 71, 2170-2189, 2007.
- Schleicher, N. J., Schäfer, J., Blanc, G., Chen, Y., Chai, F., Cen, K., and Norra, S.: Atmospheric particulate mercury in the megacity Beijing: Spatio-temporal variations and source  
735 apportionment, *Atmos. Environ.*, 109, 251-261, doi: 10.1016/j.atmosenv.2015.03.018, 2015.
- Seigneur, C., Abeck, H., Chia, G., Reinhard, M., Bloom, N. S., Prestbo, E., and Saxena, P.: Mercury adsorption to elemental carbon (soot) particles and atmospheric particulate matter, *Atmos. Environ.*, 32, 2649-2657, 1998.
- Selin, N. E.: Global biogeochemical cycling of mercury: A review, *Annu. Rev. Env. Resour.*, 34,  
740 43-63, 2009.

Sherman, L. S., Blum, J. D., Johnson, K. P., Keeler, G. J., Barres, J. A., and Douglas, T. A.: Mass-independent fractionation of mercury isotopes in Arctic snow driven by sunlight, *Nature Geosci.*, 3, 173-177, 2010.

Sherman, L. S., Blum, J. D., Keeler, G. J., Demers, J. D., and Dvornch, J. T.: Investigation of  
745 local mercury deposition from a coal-fired power plant using mercury isotopes, *Environ. Sci. Technol.*, 46, 382-390, 2012.

Sherman, L. S., Blum, J. D., Franzblau, A., and Basu, N.: New insight into biomarkers of human mercury exposure using naturally occurring mercury stable isotopes, *Environ. Sci. Technol.*, 47, 3403-3409, 2013.

750 Sherman, L. S., Blum, J. D., Dvornch, J. T., Gratz, L. E., and Landis, M. S.: The use of Pb, Sr, and Hg isotopes in Great Lakes precipitation as a tool for pollution source attribution, *Sci. Total Environ.*, 502, 362-374, doi: 10.1016/j.scitotenv.2014.09.034, 2015.

Smith, C. N., Kesler, S. E., Blum, J. D., and Rytuba, J. J.: Isotope geochemistry of mercury in source rocks, mineral deposits and spring deposits of the California coast ranges, USA, *Earth. Planet. Sci. Lett.*, 269, 398-406, 2008.

755 Smith, R. S., Wiederhold, J. G., and Kretzschmar, R.: Mercury isotope fractionation during precipitation of metacinnabar ( $\beta$ -HgS) and montroydite (HgO), *Environ. Sci. Technol.*, 49, 4325-4334, doi: 10.1021/acs.est.5b00409, 2015.

Song, S., Wu, Y., Jiang, J., Yang, L., Cheng, Y., and Hao, J.: Chemical characteristics of size-resolved PM<sub>2.5</sub> at a roadside environment in Beijing, China, *Environ. Pollut.*, 161, 215-221, doi: 10.1016/j.envpol.2011.10.014, 2012.

Song, Y., Tang, X. Y., Xie, S. D., Zhang, Y. H., Wei, Y. J., Zhang, M. S., Zeng, L. M., and Lu, S. H.: Source apportionment of PM<sub>2.5</sub> in Beijing in 2004, *J. Hazard. Mater.*, 146, 124-130, 2007.

Sonke, J. E.: A global model of mass independent mercury stable isotope fractionation, *Geochim. Cosmochim. Acta*, 75, 4577-4590, 2011.

765 Streets, D. G., Hao, J., Wu, Y., Jiang, J., Chan, M., Tian, H., and Feng, X.: Anthropogenic mercury emissions in China, *Atmos. Environ.*, 39, 7789-7806, doi: 10.1016/j.atmosenv.2005.08.029, 2005.

Sun, G., Sommar, J., Feng, X., Lin, C.-J., Ge, M., Wang, W., Yin, R., Fu, X., and Shang, L.:  
770 Mass-Dependent and -Independent Fractionation of Mercury Isotope during Gas-Phase

Oxidation of Elemental Mercury Vapor by Atomic Cl and Br, *Environ. Sci. Technol.*, 50, 9232-9241, 10.1021/acs.est.6b01668, 2016.

Sun, R., Sonke, J. E., Heimbürger, L.-E., Belkin, H. E., Liu, G., Shome, D., Cukrowska, E., Liousse, C., Pokrovsky, O. S., and Streets, D. G.: Mercury stable isotope signatures of world coal deposits and historical coal combustion emissions, *Environ. Sci. Technol.*, 48, 7660-7668, doi: 10.1021/es501208a, 2014.

Sun, R. Y., Heimbürger, L. E., Sonke, J. E., Liu, G. J., Amouroux, D., and Berail, S.: Mercury stable isotope fractionation in six utility boilers of two large coal-fired power plants, *Chem. Geol.*, 336, 103-111, 2013.

Waheed, A., Li, X. L., Tan, M. G., Bao, L. M., Liu, J. F., Zhang, Y. X., Zhang, G. L., and Li, Y.: Size Distribution and Sources of Trace Metals in Ultrafine/Fine/Coarse Airborne Particles in the Atmosphere of Shanghai, *Aerosol Sci. Technol.*, 45, 163-171, 2011.

Wang, H., Kawamura, K., and Shooter, D.: Carbonaceous and ionic components in wintertime atmospheric aerosols from two New Zealand cities: Implications for solid fuel combustion, *Atmos. Environ.*, 39, 5865-5875, 2005.

Wang, L., Liu, Z., Sun, Y., Ji, D., and Wang, Y.: Long-range transport and regional sources of PM 2.5 in Beijing based on long-term observations from 2005 to 2010, *Atmos. Res.*, 157, 37-48, 2015a.

Wang, Z., Chen, J., Feng, X., Hintelmann, H., Yuan, S., Cai, H., Huang, Q., Wang, S., and Wang, F.: Mass-dependent and mass-independent fractionation of mercury isotopes in precipitation from Guiyang, SW China, *C. R. Geosci.*, 347, 358-367, doi: 10.1016/j.crte.2015.02.006, 2015b.

Wang, Z. W., Zhang, X. S., Chen, Z. S., and Zhang, Y.: Mercury concentrations in size-fractionated airborne particles at urban and suburban sites in Beijing, China, *Atmos. Environ.*, 40, 2194-2201, 2006.

Wiederhold, J. G., Cramer, C. J., Daniel, K., Infante, I., Bourdon, B., and Kretzschmar, R.: Equilibrium mercury isotope fractionation between dissolved Hg(II) species and thiol-bound Hg, *Environ. Sci. Technol.*, 44, 4191-4197, 2010.

Won, J. H., Park, J. Y., and Lee, T. G.: Mercury emissions from automobiles using gasoline, diesel, and LPG, *Atmos. Environ.*, 41, 7547-7552, 2007.

- 800 Xiu, G. L., Cai, J., Zhang, W. Y., Zhang, D. N., Bueler, A., Lee, S. C., Shen, Y., Xu, L. H.,  
Huang, X. J., and Zhang, P.: Speciated mercury in size-fractionated particles in Shanghai  
ambient air, *Atmos. Environ.*, 43, 3145-3154, 2009.
- Xu, L. L., Chen, J. S., Niu, Z. C., Yin, L. Q., and Chen, Y. T.: Characterization of mercury in  
atmospheric particulate matter in the southeast coastal cities of China, *Atmos. Pollut. Res.*, 4,  
805 454-461, 2013.
- Xu, M., Yan, R., Zheng, C., Qiao, Y., Han, J., and Sheng, C.: Status of trace element emission in  
a coal combustion process: A review, *Fuel Process. Technol.*, 85, 215-237, doi:  
10.1016/S0378-3820(03)00174-7, 2004.
- Yin, R., Feng, X., and Shi, W.: Application of the stable-isotope system to the study of sources  
810 and fate of Hg in the environment: A review, *Appl. Geochem.*, 25, 1467-1477,  
<http://dx.doi.org/10.1016/j.apgeochem.2010.07.007>, 2010.
- Yin, R. S., Feng, X. B., and Meng, B.: Stable mercury isotope variation in rice plants (*Oryza  
sativa* L.) from the Wanshan mercury mining district, SW China, *Environ. Sci. Technol.*, 47,  
2238-2245, 2013.
- 815 Yin, R. S., Feng, X. B., and Chen, J. B.: Mercury stable isotopic compositions in coals from  
major coal producing fields in China and their geochemical and environmental implications,  
*Environ. Sci. Technol.*, 48, 5565-5574, doi: 10.1021/Es500322n, 2014.
- Yuan, S., Zhang, Y., Chen, J., Kang, S., Zhang, J., Feng, X., Cai, H., Wang, Z., Wang, Z., and  
Huang, Q.: Large variation of mercury isotope composition during a single precipitation event  
820 at Lhasa city, Tibetan Plateau, China, *Procedia Earth and Planetary Science*, 13, 282-286, 2015.
- Zambardi, T., Sonke, J. E., Toutain, J. P., Sortino, F., and Shinohara, H.: Mercury emissions and  
stable isotopic compositions at Vulcano Island (Italy), *Earth. Planet. Sci. Lett.*, 277, 236-243,  
2009.
- Zhang, H., Yin, R. S., Feng, X. B., Sommar, J., Anderson, C. W. N., Sapkota, A., Fu, X. W., and  
825 Larssen, T.: Atmospheric mercury inputs in montane soils increase with elevation: Evidence  
from mercury isotope signatures, *Sci. Rep.*, 3, 2013a.
- Zhang, L., Wang, S. X., Wang, L., and Hao, J. M.: Atmospheric mercury concentration and  
chemical speciation at a rural site in Beijing, China: Implications of mercury emission sources,  
*Atmos. Chem. Phys.*, 13, 10505-10516, 2013b.

- 830 Zhang, L., Wang, S. X., Wang, L., Wu, Y., Duan, L., Wu, Q. R., Wang, F. Y., Yang, M., Yang, H., Hao, J. M., and Liu, X.: Updated emission inventories for speciated atmospheric mercury from anthropogenic sources in China, *Environ. Sci. Technol.*, 49, 3185-3194, 2015.
- Zhang, Y., Schauer, J. J., Zhang, Y., Zeng, L., Wei, Y., Liu, Y., and Shao, M.: Characteristics of particulate carbon emissions from real-world Chinese coal combustion, *Environ. Sci. Technol.*, 835 42, 5068-5073, doi: 10.1021/es7022576, 2008.
- Zheng, M., Salmon, L. G., Schauer, J. J., Zeng, L., Kiang, C. S., Zhang, Y., and Cass, G. R.: Seasonal trends in PM<sub>2.5</sub> source contributions in Beijing, China, *Atmos. Environ.*, 39, 3967-3976, doi: 10.1016/j.atmosenv.2005.03.036, 2005a.
- Zheng, W., Foucher, D., and Hintelmann, H.: Mercury isotope fractionation during volatilization 840 of Hg(0) from solution into the gas phase, *J. Anal. At. Spectrom.*, 22, 1097-1104, 2007.
- Zheng, W., and Hintelmann, H.: Mercury isotope fractionation during photoreduction in natural water is controlled by its Hg/DOC ratio, *Geochim. Cosmochim. Acta*, 73, 6704-6715, 2009.
- Zheng, W., and Hintelmann, H.: Isotope fractionation of mercury during its photochemical reduction by low-molecular-weight organic compounds, *J. Phys. Chem. A*, 114, 4246-4253, 845 2010a.
- Zheng, W., and Hintelmann, H.: Nuclear field shift effect in isotope fractionation of mercury during abiotic reduction in the absence of light, *J. Phys. Chem. A*, 114, 4238-4245, 2010b.
- Zheng, X., Liu, X., Zhao, F., Duan, F., Yu, T., and H, C.: Seasonal characteristics of biomass burning contribution to Beijing aerosol, *Sci. China Ser. B*, 48, 481-488, doi: 10.1360/042005-850 15, 2005b.
- Zhou, J., Zhang, R., Cao, J., Chow, J. C., and Watson, J. G.: Carbonaceous and ionic components of atmospheric fine particles in Beijing and their impact on atmospheric visibility, *Aerosol Air Qual. Res.*, 12, 492-502, 2012.
- Zhu, J., Wang, T., Talbot, R., Mao, H., Yang, X., Fu, C., Sun, J., Zhuang, B., Li, S., Han, Y., and 855 Xie, M.: Characteristics of atmospheric mercury deposition and size-fractionated particulate mercury in urban Nanjing, China, *Atmos. Chem. Phys.*, 14, 2233-2244, 2014.

**Figure 1.** Seasonal variations of PM<sub>2.5</sub> (a) and elemental carbon (b) contents, Hg concentrations (c) and Hg isotopic ratios (d-f) of the PM<sub>2.5</sub> samples. For each box plot, the median is the 50<sup>th</sup> percentile and error bars extend from 75<sup>th</sup> percentile to the maximum value (upper) and from the 25<sup>th</sup> percentile to the minimum value (lower). The tiny square in each box represents the seasonal mean value.



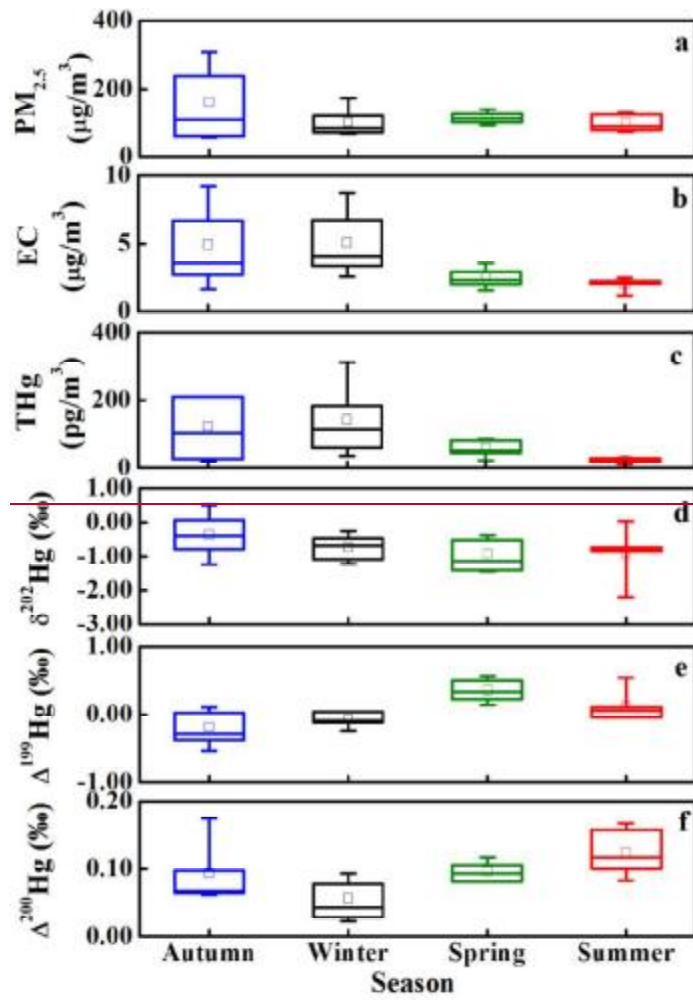

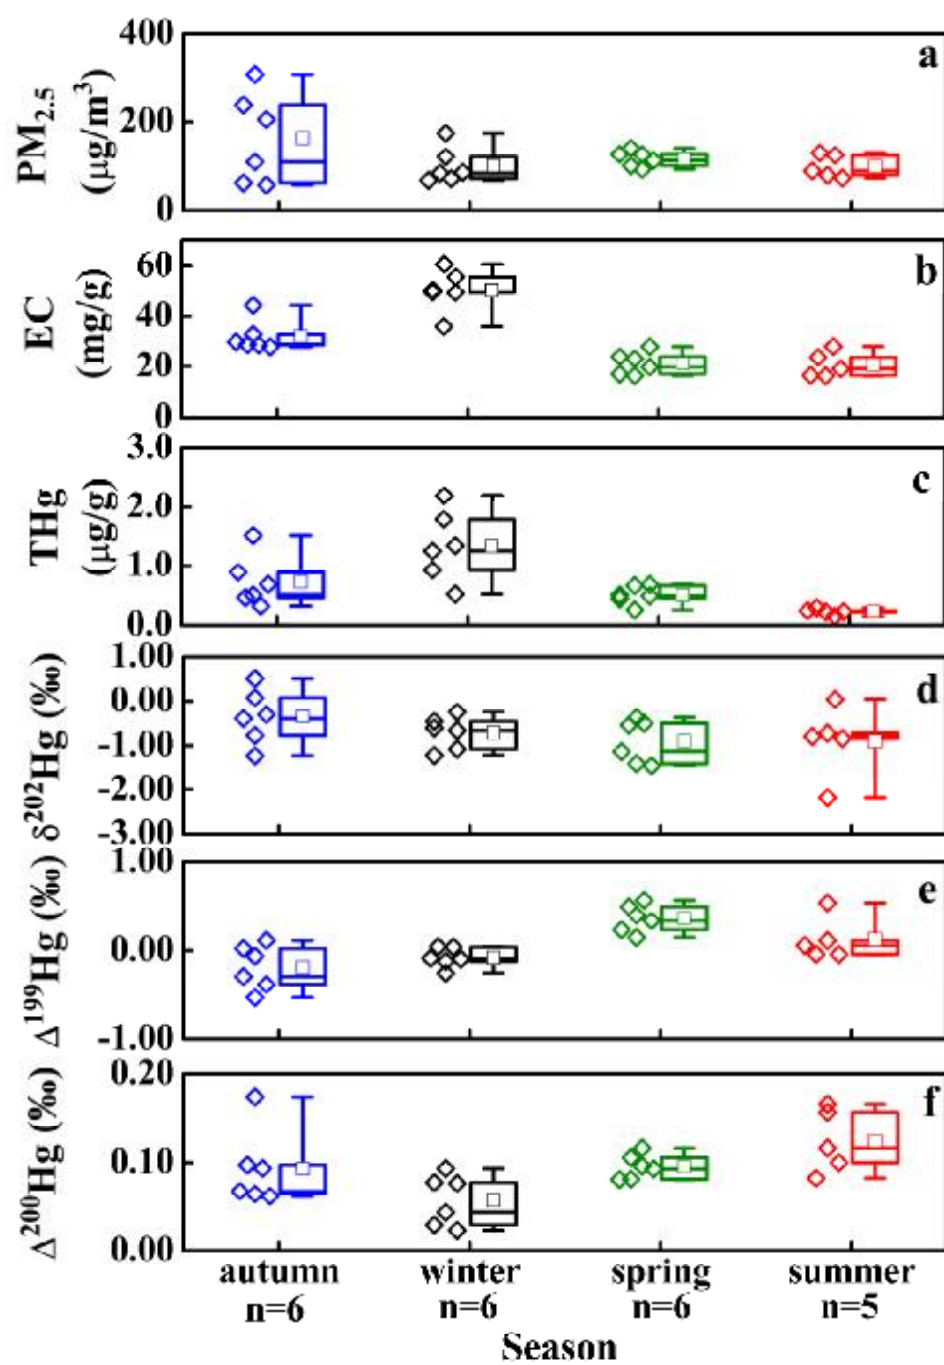

865 **Figure 2.** Shown are relationships between  $\Delta^{199}\text{Hg}$  and  $\delta^{202}\text{Hg}$  (a) and  $\Delta^{201}\text{Hg}$  (b) for 23  $\text{PM}_{2.5}$  samples. The gray areas are the ranges of Hg isotope compositions of potential source materials.

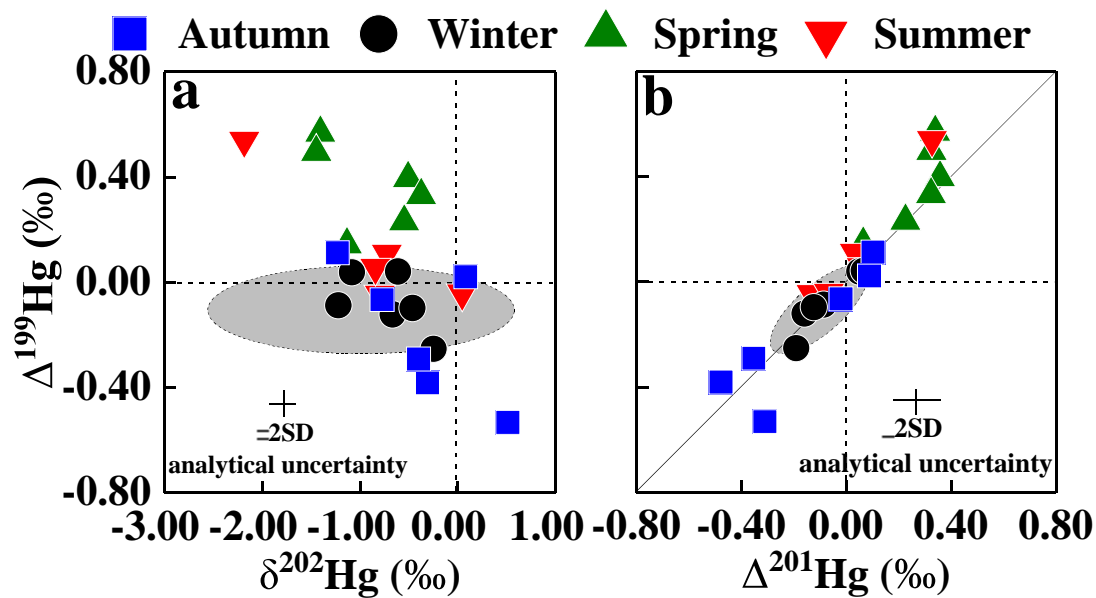

**Figure 3.** Comparison of isotopic compositions between the selected potential source materials and the PM<sub>2.5</sub> samples. The  $\delta^{202}\text{Hg}$  values of PM<sub>2.5</sub>-Hg are within the ranges of the source materials, but the  $\Delta^{199}\text{Hg}$  values are out of the range, suggesting contribution from other unknown sources or MIF during atmospheric processes.

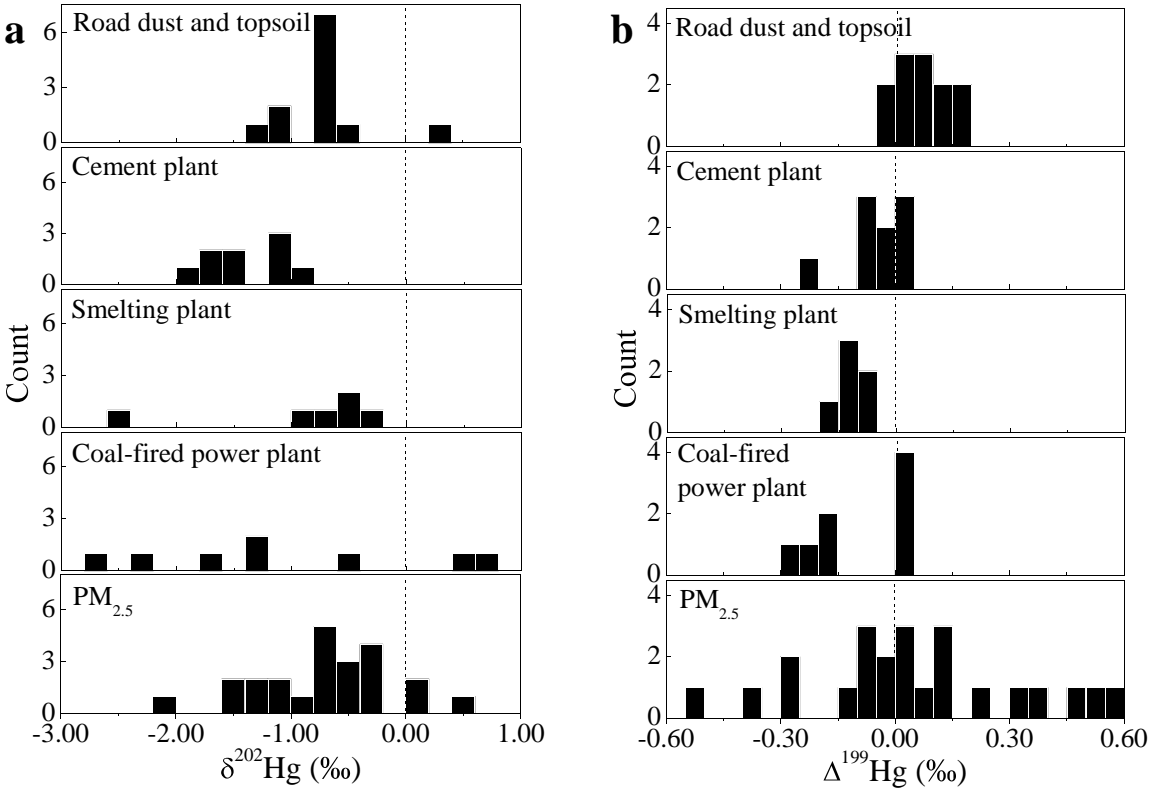

**Figure 4.** Plots of the volumetric Hg concentration versus PM<sub>2.5</sub> content (a), EC content (b), and concentrations of Co (c) and Zn (d) for the PM<sub>2.5</sub> samples. In both (c) and (d), only 14 PM<sub>2.5</sub> samples were showed with Co and Zn datasets, as 9 other PM<sub>2.5</sub> samples were used up during isotope and OC/EC analyses.

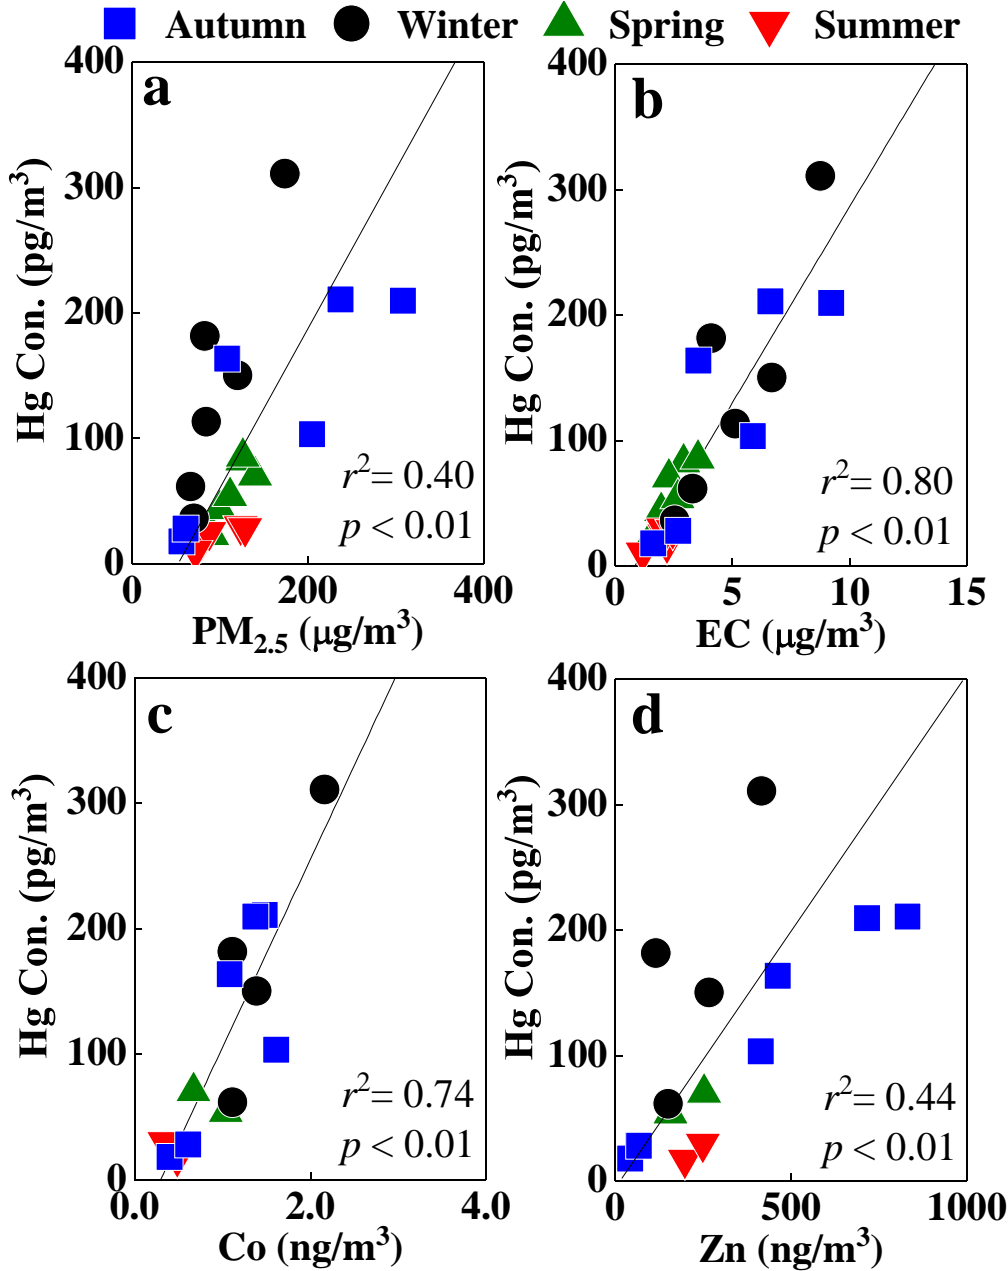

**Figure 5.** Correlations between Hg isotopic composition ( $\delta^{202}\text{Hg}$  and  $\Delta^{199}\text{Hg}$ ) and Co/Al (a and b) and EC/Al (c and d) elemental mass ratios. In all cases,  $\delta^{202}\text{Hg}$  values are positively correlated to, and  $\Delta^{199}\text{Hg}$  values are negatively correlated to the Co/Al and EC/Al ratios.

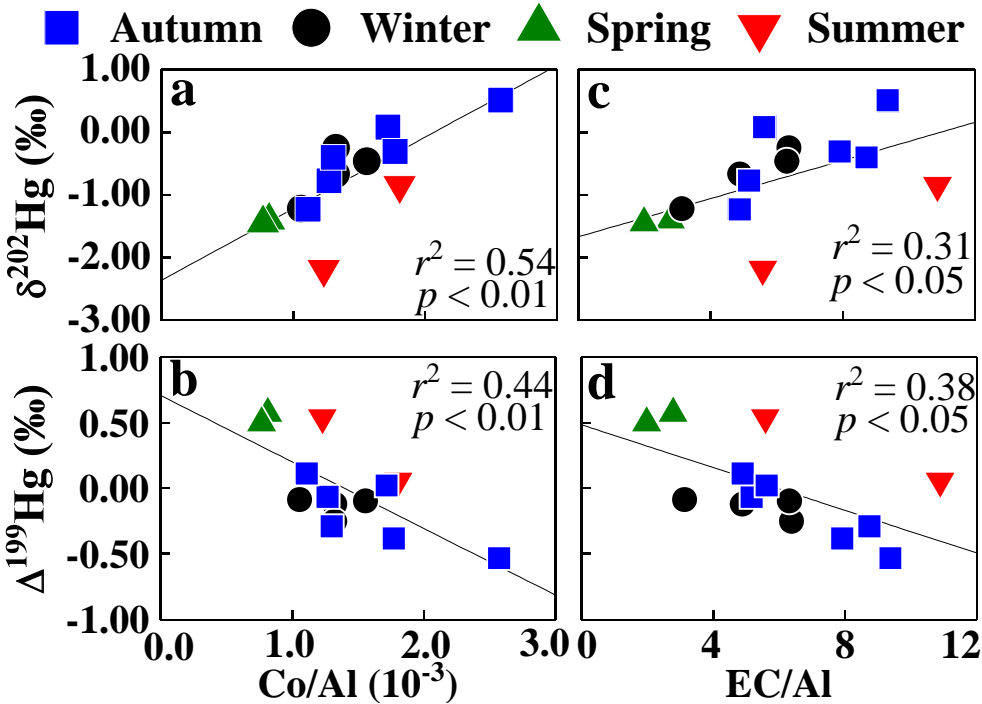

**Figure 6.** Correlations between Hg isotopic composition ( $\delta^{202}\text{Hg}$  and  $\Delta^{199}\text{Hg}$ ) and Hg enrichment factor EF(Hg) (a and b).  $\delta^{202}\text{Hg}$  value is positively correlated to the EF(Hg), while  $\Delta^{199}\text{Hg}$  value is negatively correlated to the EF(Hg).

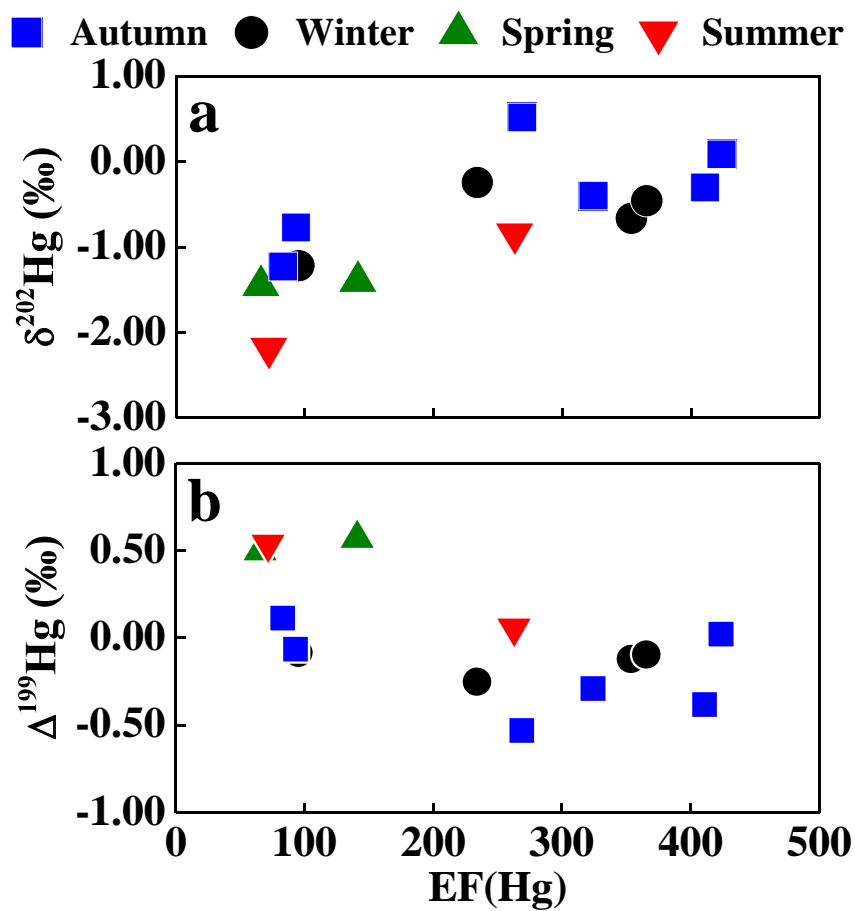

885

**Figure 7.** Correlations between Zn/Al ratios and EC contents suggest seasonal characteristics of PM<sub>2.5</sub> sources with seasonally unique  $\Delta^{199}\text{Hg}$  signatures (in ‰).

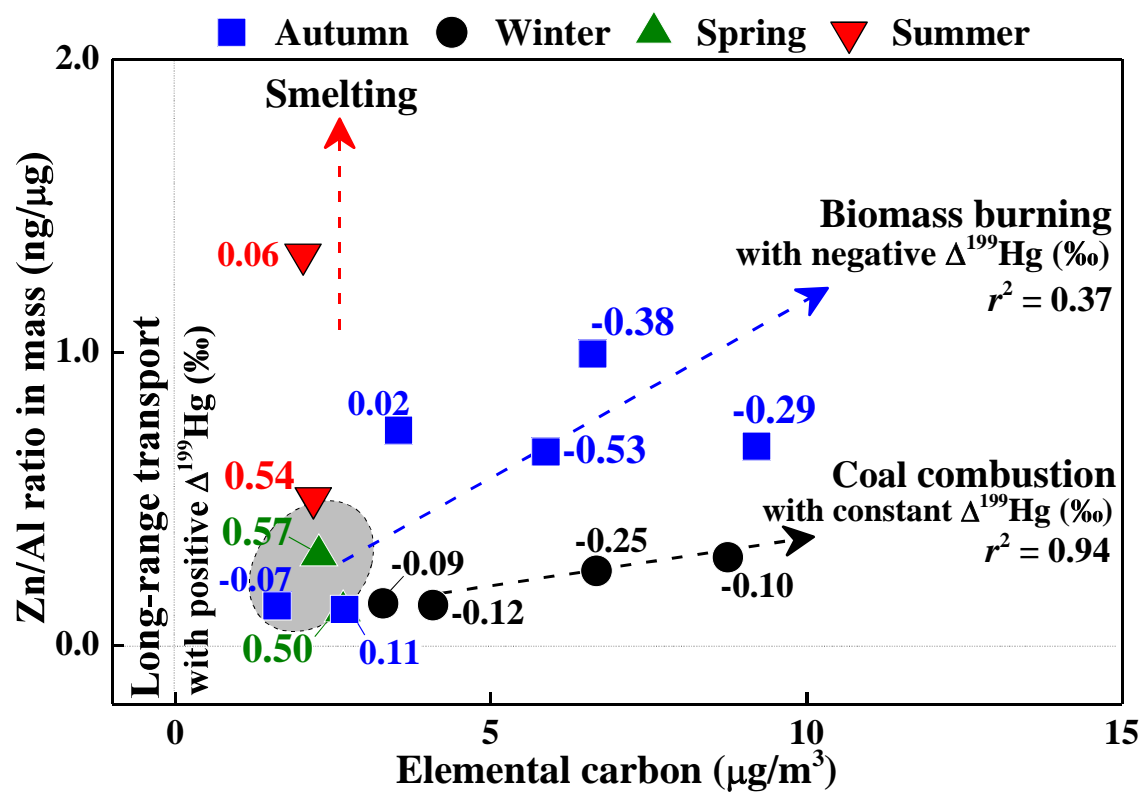



## Supporting Information

### Isotopic Composition for Source Identification of Mercury in Atmospheric Fine Particles

Qiang Huang<sup>1</sup>, Jiubin Chen<sup>1,\*</sup>, Weilin Huang<sup>2</sup>, Pingqing Fu<sup>3</sup>, Benjamin Guinot<sup>4</sup>, Xinbin Feng<sup>1</sup>,  
Lihai Shang<sup>1</sup>, Zhuhong Wang<sup>1</sup>, Zhongwei Wang<sup>1</sup>, Shengliu Yuan<sup>1</sup>, Hongming Cai<sup>1</sup>, Lianfang  
Wei<sup>3</sup> and Ben Yu<sup>1</sup>

<sup>1</sup>SKLEG, Institute of Geochemistry, Chinese Academy of Sciences, Guiyang 550081, China

<sup>2</sup>Department of Environmental Sciences, Rutgers, The State University of New Jersey, New  
Brunswick, NJ 08901, USA

<sup>3</sup>LAPC, Institute of Atmospheric Physics, Chinese Academy of Sciences, Beijing 100029,  
China

<sup>4</sup>Laboratoire d'Aérodologie UMR5560 CNRS-Université Toulouse 3, Toulouse, France

\*Corresponding author.

E-mail: [chenjiubin@vip.gyig.ac.cn](mailto:chenjiubin@vip.gyig.ac.cn) Tel.: +86 851 85892669.

|          |                                                                   |
|----------|-------------------------------------------------------------------|
| Page S2  | Calculation of Enrichment Factor and Principal Component Analysis |
| Page S3  | Calculation of Secondary Organic Carbon                           |
| Page S5  | Table S1                                                          |
| Page S6  | Table S2                                                          |
| Page S7  | Table S3                                                          |
| Page S8  | Table S4                                                          |
| Page S9  | Table S5                                                          |
| Page S10 | Figure S1                                                         |
| Page S11 | Figure S2                                                         |
| Page S12 | Figure S3                                                         |
| Page S13 | Figure S4                                                         |
| Page S14 | References                                                        |

## Calculation of Enrichment Factor

The enrichment factor (EF) of a given element (e.g., Hg) in a sample is defined as the content of that element relative to its abundance in the upper continental crust (UCC) (Rudnick and Gao, 2003) in comparison with a process-insensitive element (e.g. Al, Fe, Ti, Si). In this study, we use Al as the process-insensitive element because Al is a main component~~osition~~ of UCC and it presumably has little or no contribution from anthropogenic sources (Chen et al., 2014). The EF of an element of interest ( $C_{xx}$ ) is calculated using the following equation:

$$EF_{xx} = (C_{xx}/C_{Al})_{\text{sample}} / (C_{xx}/C_{Al})_{\text{ucc}}$$

The EF values calculated for the PM<sub>2.5</sub> samples are listed in [Table S4](#). In general, the elements with EF values between 5 and 10 in geochemical samples are considered to have significant contribution from non-crustal sources, whereas the elements with high EF values (>10) are essentially from anthropogenic activities (Chen et al., 2014).

## Principal Component Analysis

Four factors are extracted from the Varimax rotated Principal Component Analysis, which accounted for 93% of the Explained Variance (Expl. Var.) of the entire data set. This finding is consistent with a previous report (Schleicher et al., 2015). The factor loadings are listed in [Table S5](#).

Factor **F-1** explains 39% of the total variance of the data, which is characterized by high loadings of the elements (Pb, Rb, Se, Zn, Tl, Cr, Cd, Fe and Ni) from mainly anthropogenic sources. After the phase-out of leaded gasoline in China since 1997, vehicle emission has not been the major emission source of Pb in airborne PM. Instead, coal combustion has since become the major source of Pb in PM (Zhang et al., 2009; Xu et al., 2012). Meanwhile, Se,

Cd and Zn with high contents were also considered mainly from coal combustion (Schleicher et al., 2012). Although many coal-fired power plants have been closed or replaced by gas-fired stations in Beijing, coal consumption is still huge in Beijing, particular in coal combustion for winter heating mainly used outside the 5<sup>th</sup> ring road of Beijing (Lin et al., 2016). Previous study showed that the petroleum refining and pollutant associated with petrochemical industry may be important sources of primary fine particles in Beijing, but they are not the main sources of PM<sub>2.5</sub> (Lin et al., 2016). In addition to coal combustion, industrial activities (e.g. metallurgical processes) might also contribute to these element associations, as evidence by the highest EFs of Se, Cd, Pb, Zn, Tl and Cr in two dust samples from the smelting plant (Table S4). As a result, **F-1** is labeled as “mixed anthropogenic factor” mainly comprise coal combustion and nonferrous metal smelting. Factor **F-2** is characterized by high loading of Ca, Sr, Al and Mg which explains 24% of the total variance and indicated the lithogenicpetrological source contribution. Possible anthropogenic sources might be from construction activities as Ca, Sr, Al and Mg contents are high in cement materials, such as concrete mortar, lime or bricks (Schleicher et al., 2015). Additionally typical host minerals for these elements with low EFs (Table S4) may be from windblown dust (Visser et al., 2015). Collectively, Factor **F-1** and **F-2** can be labeled as a combination of coal combustion, nonferrous metal smelting and building materials that have high loading of Hg.

Factor **F-3** is characterized by high contents of Sb, Cu, PM<sub>2.5</sub> and EC, accounting for 23% of the total variance. Since Sb and Cu in urban aerosols are mainly from brake wear of vehicles (Visser et al., 2015), this factor may be best referred to as “traffic emission factor”. Factor **F-4** is dominated by K and Na, which has been reported mainly from the biomass burning (Zheng et al., 2005a; Zheng et al., 2005b). Low loading of Hg in factors **F-3** and **F-4**

suggest traffic emission and biomass burning sources may be not the major contributors for PM<sub>2.5</sub>-bound Hg.

#### **Calculation of Secondary Organic Carbon**

Secondary organic carbon (SOC) is frequently used to evaluate the efficiency of secondary aerosol production in the literature (Castro et al., 1999; Yu et al., 2004; Rengarajan et al., 2011). Here we use the EC-tracer method to estimate the SOC by employing the equation of  $SOC = OC - EC * (OC/EC)_{min}$  (Castro et al., 1999; Cao et al., 2004; Yu et al., 2004; Rengarajan et al., 2011), and by assuming the minimum OC/EC ratio as the primary ratio (Rengarajan et al., 2011). In this study, the  $(OC/EC)_{min}$  of 2.02 observed for PM<sub>2.5</sub> is used in the calculation.

**Table S1.** Total 23 PM<sub>2.5</sub> samples **we**are collected in four seasons from Beijing of China, and their sampling information, mercury concentrations and isotope compositions are displayed and their seasonal average and total average values are also given below.

| Season        | No.     | Date       | Rain (mm)      | Arriving air mass | Sunshine duration (hr) | T <sup>v</sup> (°C) | RH <sup>b</sup> (%) | PM <sub>2.5</sub> (μg/m <sup>3</sup> ) | THg (ng/g) | THg (pg/m <sup>3</sup> ) | OC (μg/m <sup>3</sup> ) | EC (μg/m <sup>3</sup> ) | OC (mg/g) | EC (mg/g) | Δ <sup>202</sup> Hg (‰) | Δ <sup>199</sup> Hg (‰) | Δ <sup>200</sup> Hg (‰) | Δ <sup>201</sup> Hg (‰) | Δ <sup>204</sup> Hg (‰) |
|---------------|---------|------------|----------------|-------------------|------------------------|---------------------|---------------------|----------------------------------------|------------|--------------------------|-------------------------|-------------------------|-----------|-----------|-------------------------|-------------------------|-------------------------|-------------------------|-------------------------|
| Autumn        | PM-01   | 2013-9-30  | n <sup>c</sup> | SE                | 0                      | 19.2                | 78                  | 205                                    | 505        | 103                      | 13.8                    | 5.9                     | 67        | 29        | 0.51                    | -0.53                   | 0.17                    | -0.31                   | -0.23                   |
|               | PM-02   | 2013-10-1  | 12             | NW                | 3.6                    | 18.5                | 81                  | 56                                     | 319        | 18                       | 4.8                     | 1.6                     | 86        | 29        | -0.77                   | -0.07                   | 0.06                    | -0.02                   | -0.81                   |
|               | PM-03   | 2013-10-2  | n              | NW                | 10.9                   | 17.1                | 50                  | 61                                     | 461        | 28                       | 5.8                     | 2.7                     | 95        | 44        | -1.23                   | 0.11                    | 0.09                    | 0.10                    | -0.80                   |
|               | PM-04   | 2013-10-3  | n              | S                 | 9.4                    | 15.4                | 70                  | 108                                    | 1520       | 164                      | 7.2                     | 3.5                     | 66        | 33        | 0.08                    | 0.02                    | 0.10                    | 0.09                    | -0.22                   |
|               | PM-05   | 2013-10-4  | n              | SW                | 4.7                    | 16.6                | 74                  | 237                                    | 888        | 211                      | 18.4                    | 6.6                     | 77        | 28        | -0.31                   | -0.38                   | 0.07                    | -0.48                   | -0.16                   |
|               | PM-06   | 2013-10-5  | n              | S                 | 5.3                    | 18.3                | 74                  | 308                                    | 680        | 210                      | 33.2                    | 9.2                     | 108       | 30        | -0.40                   | -0.29                   | 0.06                    | -0.35                   | -0.25                   |
| Winter        | Average |            |                |                   | 17.5                   | 17.5                | 71                  | 163                                    | 728        | 122                      | 13.9                    | 4.9                     | 83        | 32        | -0.35                   | -0.19                   | 0.09                    | -0.16                   | -0.41                   |
|               | 1SD     |            |                |                   | 1.4                    | 1.4                 | 11                  | 103                                    | 433        | 87                       | 10.8                    | 2.8                     | 16        | 6         | 0.61                    | 0.25                    | 0.04                    | 0.25                    | 0.31                    |
|               | PM-07   | 2013-12-17 | n              | N                 | 1.1                    | -0.6                | 49                  | 70                                     | 516        | 36                       | 7.6                     | 2.5                     | 108       | 36        | -1.08                   | 0.04                    | 0.08                    | 0.05                    | 0.11                    |
|               | PM-08   | 2013-12-18 | n              | N                 | 7.7                    | -4.4                | 37                  | 83                                     | 2200       | 182                      | 12.3                    | 4.1                     | 149       | 49        | -0.67                   | -0.12                   | 0.02                    | -0.16                   | 0.04                    |
|               | PM-09   | 2013-12-19 | n              | N                 | 8.3                    | -4.5                | 44                  | 84                                     | 1350       | 113                      | 15.7                    | 5.1                     | 186       | 61        | -0.61                   | 0.04                    | 0.08                    | 0.07                    | -0.19                   |
|               | PM-10   | 2013-12-20 | n              | N                 | 8                      | -2.8                | 36                  | 67                                     | 925        | 62                       | 9.3                     | 3.3                     | 140       | 50        | -1.22                   | -0.09                   | 0.03                    | -0.09                   | -0.07                   |
| Spring        | PM-11   | 2013-12-21 | n              | N                 | 7                      | -2.4                | 36                  | 120                                    | 1250       | 150                      | 25.8                    | 6.7                     | 215       | 56        | -0.25                   | -0.25                   | 0.09                    | -0.19                   | -0.18                   |
|               | PM-12   | 2013-12-22 | n              | NW                | 5.3                    | -3.3                | 52                  | 174                                    | 1790       | 311                      | 41.7                    | 8.8                     | 240       | 50        | -0.46                   | -0.10                   | 0.04                    | -0.12                   | -0.25                   |
|               | Average |            |                |                   | -3.0                   | -3.0                | 42                  | 100                                    | 1340       | 142                      | 18.7                    | 5.1                     | 173       | 50        | -0.72                   | -0.08                   | 0.06                    | -0.07                   | -0.09                   |
|               | 1SD     |            |                |                   | 1.4                    | 1.4                 | 7                   | 41                                     | 599        | 99                       | 13.0                    | 2.3                     | 49        | 8         | 0.37                    | 0.11                    | 0.03                    | 0.11                    | 0.14                    |
|               | PM-13   | 2014-4-22  | n              | SW                | 11.2                   | 19.7                | 39                  | 125                                    | 659        | 82                       | 8.6                     | 2.9                     | 69        | 23        | -0.51                   | 0.40                    | 0.10                    | 0.36                    | -0.17                   |
|               | PM-14   | 2014-4-23  | n              | S                 | 8.8                    | 20                  | 60                  | 140                                    | 505        | 71                       | 8.0                     | 2.3                     | 57        | 16        | -1.40                   | 0.57                    | 0.08                    | 0.34                    | -0.18                   |
| Summer        | PM-15   | 2014-4-26  | 14             | NW                | 8.8                    | 15.6                | 63                  | 91                                     | 252        | 23                       | 5.3                     | 1.5                     | 58        | 17        | -0.55                   | 0.23                    | 0.12                    | 0.23                    | -0.43                   |
|               | PM-16   | 2014-4-27  | n              | N                 | 11.3                   | 17.6                | 52                  | 99                                     | 440        | 44                       | 7.2                     | 2.0                     | 72        | 20        | -1.13                   | 0.14                    | 0.09                    | 0.07                    | -0.11                   |
|               | PM-17   | 2014-4-28  | n              | N                 | 11.3                   | 18.8                | 42                  | 111                                    | 485        | 54                       | 8.6                     | 2.7                     | 77        | 24        | -1.45                   | 0.50                    | 0.08                    | 0.32                    | -0.08                   |
|               | PM-18   | 2014-4-29  | n              | NW                | 10.9                   | 19.3                | 41                  | 126                                    | 679        | 85                       | 8.9                     | 3.5                     | 71        | 28        | -0.37                   | 0.33                    | 0.11                    | 0.32                    | -0.39                   |
|               | Average |            |                |                   | 18.5                   | 18.5                | 50                  | 115                                    | 503        | 60                       | 7.7                     | 2.5                     | 67        | 21        | -0.90                   | 0.36                    | 0.10                    | 0.27                    | -0.23                   |
|               | 1SD     |            |                |                   | 1.7                    | 1.7                 | 10                  | 18                                     | 157        | 24                       | 1.4                     | 0.7                     | 8         | 5         | 0.48                    | 0.16                    | 0.02                    | 0.11                    | 0.15                    |
| Total average | PM-19   | 2014-6-29  | n              | S                 | 10.8                   | 28.8                | 46                  | 78                                     | 221        | 17                       | 7.6                     | 2.2                     | 98        | 28        | -2.18                   | 0.54                    | 0.10                    | 0.33                    | 0.41                    |
|               | PM-20   | 2014-6-30  | n              | S                 | 0                      | 29.8                | 52                  | 88                                     | 289        | 25                       | 6.8                     | 2.1                     | 77        | 24        | -0.73                   | 0.11                    | 0.12                    | 0.03                    | -0.54                   |
|               | PM-21   | 2014-7-1   | 49             | S                 | 0                      | 28.8                | 85                  | 72                                     | 150        | 11                       | 2.8                     | 1.2                     | 40        | 16        | -0.80                   | -0.05                   | 0.16                    | -0.13                   | 0.36                    |
|               | PM-22   | 2014-7-2   | n              | SW                | 0.5                    | 23.4                | 78                  | 123                                    | 243        | 30                       | 5.9                     | 2.0                     | 48        | 16        | -0.84                   | 0.06                    | 0.08                    | 0.06                    | -0.11                   |
|               | PM-23   | 2014-7-3   | n              | SW                | 1.4                    | 26.1                | 77                  | 128                                    | 223        | 29                       | 6.2                     | 2.4                     | 49        | 19        | -0.04                   | -0.04                   | 0.17                    | -0.07                   | -0.77                   |
|               | Average |            |                |                   | 27.4                   | 27.4                | 68                  | 98                                     | 225        | 22                       | 5.9                     | 2.0                     | 53        | 18        | -0.90                   | 0.12                    | 0.13                    | 0.04                    | -0.13                   |
| Total average | 1SD     |            |                |                   | 2.6                    | 2.6                 | 17                  | 26                                     | 50         | 8                        | 1.8                     | 0.5                     | 31        | 8         | 0.80                    | 0.24                    | 0.04                    | 0.18                    | 0.53                    |
|               |         |            |                |                   | 14.6                   | 14.6                | 57                  | 120                                    | 720        | 90                       | 11.8                    | 3.7                     | 98        | 32        | -0.71                   | 0.05                    | 0.09                    | 0.02                    | -0.22                   |
|               | 1SD     |            |                |                   | 11.4                   | 11.4                | 17                  | 61                                     | 551        | 80                       | 9.6                     | 2.3                     | 54        | 14        | 0.58                    | 0.29                    | 0.04                    | 0.23                    | 0.31                    |

<sup>a</sup> the daily average temperature; <sup>b</sup> the daily average relative humidity; <sup>c</sup> n is not detectable.

**Table S2.** Mercury concentrations and isotopic compositions for the 30 solid materials from different potential emission sources in China.

| No.     | Type                       | From                                          | THg<br>(ng/g) | $\delta^{202}\text{Hg}$<br>(‰) | $\Delta^{199}\text{Hg}$<br>(‰) | $\Delta^{200}\text{Hg}$<br>(‰) | $\Delta^{201}\text{Hg}$<br>(‰) | $\Delta^{204}\text{Hg}$<br>(‰) |
|---------|----------------------------|-----------------------------------------------|---------------|--------------------------------|--------------------------------|--------------------------------|--------------------------------|--------------------------------|
| TSP     | Total suspended particle   | Air of Yanqing district, northwestern Beijing | 89            | -0.74                          | 0.18                           | 0.01                           | 0.06                           | -0.15                          |
| TS-01   | Topsoil                    | Beijing, Olympic Park                         | 408           | -1.11                          | 0.10                           | 0.02                           | 0.03                           | -0.09                          |
| TS-02   | Topsoil                    | Beijing, Beihai Park                          | 7747          | -1.14                          | 0.07                           | 0.02                           | 0.01                           | -0.10                          |
| TS-03   | Topsoil                    | Beijing, the Winter Palace                    | 40            | -0.59                          | 0.03                           | 0.02                           | 0.06                           | -0.24                          |
| TS-04   | Topsoil                    | Beijing, Renmin University of China (RUC)     | 146           | -0.77                          | 0.04                           | 0.04                           | 0.08                           | -0.08                          |
| SM-D-01 | Roof dust                  | Beijing, RUC                                  | 94            | 0.35                           | 0.15                           | 0.11                           | 0.22                           | -0.44                          |
| SM-D-02 | Road dust                  | Beijing, RUC                                  | 24            | -0.79                          | 0.18                           | 0.10                           | 0.27                           | -0.41                          |
| TS-05   | Suburban topsoil           | Shijiazhuang city                             | 23            | -1.37                          | -0.02                          | 0.03                           | -0.04                          | -0.01                          |
| SM-D-03 | Urban road dust            | Shijiazhuang city                             | 119           | -0.75                          | 0.04                           | 0.06                           | 0.07                           | -0.03                          |
| SM-D-04 | Urban road dust            | Shijiazhuang city                             | 30            | -0.66                          | -0.05                          | 0.06                           | -0.03                          | -0.15                          |
| SM-D-05 | Suburban road dust         | Shijiazhuang city                             | 70            | -0.78                          | 0.10                           | 0.06                           | -0.03                          | 0.10                           |
| SM-D-06 | Suburban road dust         | Shijiazhuang city                             | 117           | -0.77                          | 0.07                           | 0.07                           | 0.03                           | 0.03                           |
| CFPP-01 | Feed coal                  | Coal-fired power plant -1 <sup>a</sup>        | 191           | -1.26                          | 0.02                           | 0.03                           | 0.04                           | -0.09                          |
| CFPP-02 | Feed coal                  | Coal-fired power plant -2 <sup>b</sup>        | 54            | -1.78                          | -0.27                          | -0.02                          | -0.25                          | 0.11                           |
| CFPP-03 | Bottom ash                 | Coal-fired power plant -1                     | 2.1           | -2.26                          | 0.03                           | -0.01                          | -0.05                          | -0.09                          |
| CFPP-04 | Bottom ash                 | Coal-fired power plant -2                     | 0.35          | -0.48                          | -0.23                          | -0.04                          | -0.19                          | 0.03                           |
| CFPP-05 | Desulfurization gypsum     | Coal-fired power plant -1                     | 142           | -0.58                          | 0.02                           | 0.01                           | 0.00                           | 0.01                           |
| CFPP-06 | Desulfurization gypsum     | Coal-fired power plant -2                     | 6.8           | 0.62                           | -0.17                          | -0.03                          | -0.16                          | 0.06                           |
| CFPP-07 | Fly ash                    | Coal-fired power plant -1                     | 332           | -2.67                          | -0.20                          | -0.04                          | -0.21                          | -0.06                          |
| CFPP-08 | Fly ash                    | Coal-fired power plant -2                     | 875           | -1.37                          | 0.03                           | 0.03                           | 0.01                           | -0.04                          |
| SP-01   | Blast furnace dust         | Smelting plant <sup>c</sup>                   | 113           | -2.48                          | -0.11                          | 0.00                           | -0.07                          | -0.07                          |
| SP-02   | Sintering dust             | Smelting plant                                | 10800         | -0.84                          | -0.17                          | -0.01                          | -0.13                          | -0.09                          |
| SP-03   | Coke                       | Smelting plant                                | 30            | -0.72                          | -0.09                          | 0.00                           | -0.03                          | -0.07                          |
| SP-04   | Return powder              | Smelting plant                                | 1280          | -0.42                          | -0.14                          | 0.02                           | -0.12                          | -0.01                          |
| SP-05   | Dust of blast furnace slag | Smelting plant                                | 27            | -0.42                          | -0.08                          | 0.01                           | -0.07                          | -0.07                          |
| SP-06   | Agglomerate                | Smelting plant                                | 29            | -0.32                          | -0.12                          | -0.01                          | -0.07                          | 0.07                           |
| CP-01   | Coal-1                     | Cement plant <sup>d</sup>                     | 471           | -1.74                          | -0.09                          | 0.01                           | -0.11                          | 0.04                           |
| CP-02   | Coal-2                     | Cement plant <sup>e</sup>                     | 38            | -1.55                          | -0.07                          | 0.05                           | -0.13                          | -0.13                          |
| CP-03   | Raw meal                   | Cement plant <sup>e</sup>                     | 241           | -1.99                          | -0.07                          | 0.00                           | -0.13                          | -0.07                          |
| CP-04   | Sandstone                  | Cement plant <sup>e</sup>                     | 13            | -1.02                          | 0.04                           | 0.06                           | -0.03                          | -0.03                          |
| CP-05   | Clay                       | Cement plant <sup>e</sup>                     | 17            | -1.79                          | -0.22                          | 0.02                           | -0.29                          | -0.05                          |
| CP-06   | Limestone                  | Cement plant <sup>e</sup>                     | 13            | -1.43                          | -0.07                          | -0.02                          | -0.03                          | 0.08                           |
| CP-07   | Desulfurization gypsum     | Cement plant                                  | 1180          | -1.47                          | -0.02                          | 0.06                           | -0.02                          | -0.20                          |
| CP-08   | Steel slag                 | Cement plant <sup>e</sup>                     | 111           | -1.02                          | 0.00                           | -0.01                          | 0.03                           | -0.03                          |
| CP-09   | Sulfuric acid residue      | Cement plant                                  | 278           | -0.97                          | 0.02                           | 0.00                           | 0.10                           | -0.11                          |
| CP-10   | Cement clinker             | Cement plant <sup>e</sup>                     | 0.94          | -1.18                          | 0.00                           | 0.01                           | 0.06                           | -0.08                          |

<sup>a</sup> a coal-fire power plant from Hubei province; <sup>b</sup> a coal-fire power plant from Mongolia province; <sup>c</sup> a smelting plant from Qinghai province; <sup>d</sup> a cement plant from Sichuan province; <sup>e</sup> data have been published in our previous work (Wang et al., 2015).

**Table S3.** Concentrations of metal elements of the 14 PM<sub>2.5</sub> samples from Beijing and 16 samples of the potential source materials.

| Sample  | Al*  | Cd    | Co   | Cr   | Cu   | Fe*  | Li   | Ni   | Pb     | Rb   | Sb   | Se   | Sr   | Tl   | V    | Zn   | Ca*  | K*   | Mg*  | Na*  |
|---------|------|-------|------|------|------|------|------|------|--------|------|------|------|------|------|------|------|------|------|------|------|
| PM-01   | 3.06 | 13.4  | 7.86 | 64.9 | 367  | 5.64 | 9.19 | 28.6 | 832    | 27.9 | 76.4 | 29.0 | 36.3 | 12.0 | 32.2 | 2.02 | 5.64 | 5.68 | 1.26 | 4.04 |
| PM-02   | 5.59 | 8.03  | 7.10 | 79.0 | 201  | 8.81 | 8.76 | 23.0 | 316    | 27.7 | 34.5 | 29.5 | 64.0 | 7.68 | 20.0 | 0.75 | 15.5 | 2.56 | 3.18 | 3.96 |
| PM-03   | 9.04 | 10.6  | 10.1 | 114  | 225  | 11.8 | 14.3 | 37.9 | 449    | 27.8 | 37.0 | 20.2 | 108  | 6.96 | 25.1 | 1.10 | 32.1 | 5.66 | 11.2 | 3.36 |
| PM-04   | 5.83 | 24.9  | 10.0 | 125  | 251  | 16.8 | 17.1 | 72.7 | 2710   | 115  | 27.0 | 85.9 | 72.7 | 22.0 | 50.8 | 4.28 | 18.4 | 15.1 | 6.41 | 6.61 |
| PM-05   | 3.53 | 21.5  | 6.25 | 72.7 | 294  | 8.90 | 11.5 | 38.6 | 2130   | 76.1 | 49.0 | 62.5 | 44.7 | 19.8 | 27.9 | 3.50 | 7.09 | 12.8 | 2.23 | 3.90 |
| PM-06   | 3.42 | 17.7  | 4.45 | 43.8 | 332  | 5.82 | 11.8 | 24.8 | 942    | 34.0 | 46.2 | 42.8 | 39.0 | 12.8 | 28.8 | 2.32 | 5.78 | 10.2 | 1.39 | 2.92 |
| PM-08   | 10.1 | 14.9  | 13.4 | 85.6 | 217  | 14.0 | 16.5 | 62.5 | 709    | 43.7 | 42.3 | 30.6 | 172  | 11.0 | 33.2 | 1.39 | 34.8 | 10.4 | 8.32 | 8.34 |
| PM-10   | 15.8 | 12.0  | 16.7 | 117  | 298  | 21.1 | 21.2 | 89.1 | 561    | 46.8 | 82.3 | 21.5 | 264  | 9.84 | 46.5 | 2.25 | 42.1 | 22.0 | 9.80 | 13.7 |
| PM-11   | 8.73 | 18.0  | 11.6 | 88.5 | 341  | 11.4 | 30.5 | 48.1 | 1110   | 45.9 | 64.9 | 48.2 | 152  | 14.9 | 29.7 | 2.22 | 31.0 | 26.2 | 7.72 | 11.3 |
| PM-12   | 7.97 | 19.2  | 12.4 | 83.9 | 269  | 10.8 | 22.2 | 45.3 | 1050   | 47.0 | 54.5 | 48.1 | 165  | 15.4 | 27.6 | 2.39 | 19.1 | 3.83 | 4.61 | 3.77 |
| PM-14   | 5.85 | 25.9  | 4.77 | 55.3 | 182  | 7.18 | 14.4 | 25.6 | 873    | 39.1 | 17.3 | 55.0 | 63.2 | 13.1 | 26.1 | 1.80 | 14.5 | 10.3 | 4.85 | 3.69 |
| PM-17   | 12.1 | 13.0  | 9.29 | 77.0 | 188  | 12.3 | 18.1 | 30.9 | 574    | 41.5 | 46.3 | 33.3 | 93.2 | 9.02 | 39.4 | 1.41 | 25.1 | 9.99 | 7.74 | 4.51 |
| PM-19   | 5.03 | 19.5  | 6.19 | 75.4 | 316  | 9.60 | 13.5 | 32.2 | 1340   | 65.4 | 35.0 | 60.0 | 52.6 | 19.8 | 47.8 | 2.53 | 13.7 | 11.4 | 3.93 | 6.01 |
| PM-22   | 1.51 | 21.2  | 2.72 | 47.2 | 412  | 3.10 | 7.49 | 18.0 | 734    | 25.4 | 25.4 | 34.7 | 19.5 | 14.9 | 18.7 | 2.01 | 2.92 | 4.26 | -    | 3.60 |
| SM-D-01 | 57.0 | 2.50  | 13.6 | 91.6 | 73.4 | 34.4 | 40.2 | 57.0 | 97.8   | 77.3 | 4.94 | 2.46 | 249  | 0.99 | 82.3 | 0.45 | 44.5 | 16.8 | 17.7 | 9.33 |
| SM-D-02 | 61.6 | 0.57  | 5.11 | 27.1 | 7.72 | 15.5 | 15.6 | 9.50 | 19.6   | 89.7 | 0.47 | 0.69 | 515  | 0.60 | 48.9 | 0.05 | 27.5 | 29.0 | 8.74 | 17.6 |
| SM-D-03 | 57.6 | 1.52  | 12.4 | 101  | 33.3 | 35.8 | 42.2 | 27.2 | 45.1   | 69.1 | 1.55 | 3.45 | 325  | 0.58 | 102  | 0.32 | 71.3 | 15.7 | 14.3 | 12.2 |
| SM-D-05 | 49.0 | 1.09  | 10.0 | 77.5 | 56.3 | 31.4 | 27.8 | 22.0 | 42.2   | 74.7 | 1.46 | 1.65 | 278  | 0.62 | 71.6 | 0.26 | 71.7 | 17.8 | 20.0 | 9.39 |
| TS-01   | 60.6 | 11.2  | 11.1 | 52.3 | 284  | 25.0 | 30.7 | 26.7 | 190    | 96.0 | 1.62 | 1.80 | 315  | 0.91 | 72.9 | 0.13 | 24.7 | 21.2 | 8.95 | 12.4 |
| TS-02   | 50.9 | 0.96  | 10.0 | 56.0 | 50.8 | 22.2 | 28.4 | 22.7 | 93.5   | 82.5 | 1.82 | 2.48 | 423  | 0.74 | 64.2 | 0.11 | 61.8 | 17.7 | 9.36 | 9.83 |
| TS-03   | 63.0 | 2.63  | 12.4 | 71.0 | 21.6 | 27.2 | 28.0 | 24.9 | 40.8   | 85.1 | 1.27 | 2.44 | 318  | 0.82 | 74.6 | 0.10 | 34.5 | 20.0 | 14.8 | 14.0 |
| CFPP-07 | 113  | 3.18  | 39.8 | 111  | 138  | 55.0 | 71.0 | 76.5 | 86.2   | 233  | 3.14 | 6.04 | 369  | 4.23 | 237  | 0.24 | 10.3 | 21.8 | 3.89 | 6.55 |
| CFPP-08 | 125  | 3.85  | 27.5 | 163  | 141  | 64.4 | 227  | 62.0 | 84.6   | 90.2 | 2.47 | 26.6 | 1680 | 1.53 | 348  | 0.16 | 32.2 | 19.0 | 5.95 | 3.74 |
| CP-03   | 11.4 | 6.31  | 17.9 | 243  | 21.7 | 16.6 | 15.9 | 30.7 | 39.2   | 21.3 | 0.76 | 1.41 | 161  | 37.6 | 275  | 0.06 | 302  | 3.54 | 4.05 | 1.20 |
| CP-04   | 40.8 | 1.16  | 7.99 | 36.6 | 14.3 | 20.8 | 27.6 | 18.1 | 14.6   | 60.5 | 1.43 | 2.95 | 77.6 | 0.65 | 54.4 | 0.05 | 39.8 | 11.7 | 6.87 | 0.79 |
| CP-05   | 108  | 1.21  | 23.1 | 88.8 | 29.4 | 55.9 | 40.7 | 40.6 | 19.6   | 84.5 | 0.44 | 2.02 | 179  | 0.78 | 175  | 0.10 | 6.71 | 18.2 | 5.65 | 9.42 |
| CP-10   | 20.9 | 3.43  | 23.3 | 584  | 38.3 | 28.8 | 26.9 | 54.8 | 50.8   | 33.1 | 1.28 | 1.39 | 222  | 0.14 | 637  | 0.13 | 446  | 5.35 | 6.33 | 0.87 |
| SP-01   | 0.71 | 68800 | 1.43 | 2.34 | 132  | 1.61 | 4.18 | 1.33 | 369000 | 108  | 68.7 | 260  | 6.16 | 27.2 | 0.47 | 76.4 | 1.12 | 9.81 | 0.57 | 1.59 |
| SP-02   | 0.08 | 94100 | 0.80 | 2.43 | 269  | 1.03 | 2.66 | 1.67 | 625000 | 109  | 262  | 401  | 4.35 | 2100 | 0.10 | 4.23 | 0.30 | 10.9 | 0.40 | 2.65 |
| SP-04   | 10.3 | 11700 | 21.7 | 216  | 2840 | 99.1 | 9.05 | 90.1 | 400000 | 24.3 | 228  | 92.0 | 281  | 61.3 | 13.8 | 41.1 | 43.3 | 3.01 | 7.12 | 2.58 |

\* units of µg/g, others with units of ng/g.

**Table S4.** The calculated enrichment factors (EFs) in PM<sub>2.5</sub> samples and potential source materials.

| Sample  | Cd         | Co | Cr | Cu    | Fe | Li  | Ni | Pb       | Rb   | Sb     | Se      | Sr | Tl      | V  | Zn     | Ca | K   | Mg | Na  | Hg     |
|---------|------------|----|----|-------|----|-----|----|----------|------|--------|---------|----|---------|----|--------|----|-----|----|-----|--------|
| PM-01   | 3962       | 12 | 19 | 349   | 4  | 10  | 16 | 1305     | 9    | 5089   | 8597    | 3  | 354     | 9  | 803    | 6  | 7   | 2  | 4   | 269    |
| PM-02   | 1302       | 6  | 13 | 105   | 3  | 5   | 7  | 271      | 5    | 1260   | 4787    | 3  | 125     | 3  | 163    | 9  | 2   | 3  | 2   | 93     |
| PM-03   | 1059       | 5  | 11 | 72    | 3  | 5   | 7  | 238      | 3    | 835    | 2027    | 3  | 70      | 2  | 149    | 11 | 2   | 7  | 1   | 83     |
| PM-04   | 3874       | 8  | 19 | 125   | 6  | 10  | 22 | 2230     | 19   | 944    | 13339   | 3  | 342     | 7  | 893    | 10 | 9   | 6  | 4   | 424    |
| PM-05   | 5535       | 8  | 18 | 243   | 5  | 11  | 19 | 2897     | 21   | 2829   | 16060   | 3  | 507     | 7  | 1209   | 6  | 13  | 3  | 4   | 411    |
| PM-06   | 4692       | 6  | 11 | 283   | 4  | 12  | 13 | 1321     | 10   | 2754   | 11344   | 3  | 338     | 7  | 826    | 5  | 10  | 2  | 3   | 324    |
| PM-08   | 1330       | 6  | 7  | 62    | 3  | 6   | 11 | 335      | 4    | 852    | 2733    | 4  | 98      | 3  | 167    | 11 | 4   | 4  | 3   | 354    |
| PM-10   | 688        | 5  | 7  | 55    | 3  | 5   | 10 | 170      | 3    | 1061   | 1230    | 4  | 56      | 2  | 173    | 8  | 5   | 3  | 3   | 95     |
| PM-11   | 1873       | 6  | 9  | 114   | 3  | 12  | 10 | 611      | 5    | 1515   | 5003    | 4  | 154     | 3  | 309    | 11 | 11  | 5  | 4   | 234    |
| PM-12   | 2183       | 7  | 9  | 98    | 3  | 9   | 10 | 631      | 6    | 1394   | 5466    | 5  | 175     | 3  | 365    | 8  | 2   | 3  | 2   | 366    |
| PM-14   | 4010       | 4  | 8  | 91    | 3  | 8   | 8  | 716      | 6    | 603    | 8525    | 3  | 203     | 4  | 375    | 8  | 6   | 5  | 2   | 141    |
| PM-17   | 976        | 4  | 6  | 45    | 2  | 5   | 4  | 228      | 3    | 782    | 2500    | 2  | 68      | 3  | 142    | 7  | 3   | 4  | 1   | 66     |
| PM-19   | 3504       | 6  | 13 | 183   | 4  | 9   | 11 | 1277     | 13   | 1417   | 10799   | 3  | 357     | 8  | 611    | 9  | 8   | 4  | 4   | 72     |
| PM-22   | 12723      | 9  | 28 | 796   | 4  | 17  | 21 | 2333     | 16   | 3438   | 20869   | 3  | 892     | 10 | 1625   | 6  | 10  | —  | 8   | 263    |
| SM-D-01 | 40         | 1  | 1  | 4     | 1  | 2   | 2  | 8        | 1    | 18     | 39      | 1  | 2       | 1  | 10     | 2  | 1   | 2  | 1   | 3      |
| SM-D-02 | 8          | 0  | 0  | 0     | 1  | 1   | 0  | 2        | 1    | 2      | 10      | 2  | 1       | 1  | 1      | 1  | 2   | 1  | 1   | 1      |
| SM-D-03 | 24         | 1  | 2  | 2     | 1  | 2   | 1  | 4        | 1    | 5      | 54      | 1  | 1       | 1  | 7      | 4  | 1   | 1  | 1   | 1      |
| SM-D-05 | 20         | 1  | 1  | 3     | 1  | 2   | 1  | 4        | 1    | 6      | 31      | 1  | 1       | 1  | 6      | 5  | 1   | 2  | 1   | 4      |
| TS-01   | 168        | 1  | 1  | 1     | 1  | 2   | 1  | 15       | 2    | 5      | 27      | 1  | 1       | 1  | 3      | 1  | 1   | 1  | 1   | 11     |
| TS-02   | 17         | 1  | 1  | 3     | 1  | 2   | 1  | 9        | 2    | 7      | 44      | 2  | 1       | 1  | 3      | 4  | 1   | 1  | 1   | 248    |
| TS-03   | 38         | 1  | 1  | 1     | 1  | 2   | 1  | 3        | 1    | 4      | 35      | 1  | 1       | 1  | 2      | 2  | 1   | 1  | 1   | 1      |
| CFPP-07 | 25         | 2  | 1  | 4     | 1  | 2   | 1  | 4        | 2    | 6      | 48      | 1  | 3       | 2  | 3      | 0  | 1   | 0  | 0   | 5      |
| CFPP-08 | 28         | 1  | 1  | 3     | 1  | 6   | 1  | 3        | 1    | 4      | 192     | 3  | 1       | 2  | 2      | 1  | 1   | 0  | 0   | 11     |
| CP-03   | 502        | 7  | 19 | 6     | 3  | 5   | 5  | 16       | 2    | 14     | 112     | 4  | 299     | 20 | 6      | 84 | 1   | 2  | 0   | 34     |
| CP-04   | 26         | 1  | 1  | 1     | 1  | 2   | 1  | 2        | 1    | 7      | 65      | 0  | 1       | 1  | 1      | 3  | 1   | 1  | 0   | 1      |
| CP-05   | 10         | 1  | 1  | 1     | 1  | 1   | 1  | 1        | 1    | 1      | 17      | 0  | 1       | 1  | 1      | 0  | 1   | 0  | 0   | 0      |
| CP-10   | 149        | 5  | 25 | 5     | 3  | 4   | 5  | 12       | 2    | 12     | 60      | 3  | 1       | 26 | 8      | 68 | 1   | 2  | 0   | 0      |
| SP-01   | 87570416   | 9  | 3  | 541   | 5  | 20  | 3  | 2488020  | 147  | 19694  | 331752  | 2  | 3467    | 1  | 130705 | 5  | 48  | 4  | 8   | 258    |
| SP-02   | 1095027659 | 48 | 28 | 10070 | 28 | 116 | 37 | 38515102 | 1361 | 686994 | 4661642 | 14 | 2437629 | 1  | 66158  | 12 | 490 | 28 | 114 | 226070 |
| SP-04   | 1028376    | 10 | 19 | 802   | 20 | 3   | 15 | 186101   | 2    | 4515   | 8098    | 7  | 540     | 1  | 4863   | 13 | 1   | 4  | 1   | 203    |



94 **Table S5.** Factor (F) loadings of the extracted factors for PM<sub>2.5</sub> samples from Beijing urban

95 area of China. Four factors account for 93% of the Explained Variance (Expl. Var.).

|                    | <b>F-1</b>  | <b>F-2</b>  | <b>F-3</b>  | <b>F-4</b>  |
|--------------------|-------------|-------------|-------------|-------------|
| Hg                 | 0.59        | 0.62        | 0.38        | -0.14       |
| Pb                 | <b>0.97</b> | 0.05        | 0.14        | 0.13        |
| Rb                 | <b>0.97</b> | 0.05        | 0.14        | 0.13        |
| Se                 | <b>0.89</b> | 0.03        | 0.35        | 0.20        |
| Zn                 | <b>0.86</b> | 0.03        | 0.46        | 0.18        |
| Tl                 | <b>0.85</b> | 0.03        | 0.49        | 0.17        |
| Cr                 | <b>0.79</b> | 0.31        | 0.45        | 0.04        |
| Cd                 | <b>0.78</b> | 0.06        | 0.48        | 0.21        |
| Fe                 | <b>0.77</b> | 0.53        | 0.23        | 0.12        |
| Ni                 | <b>0.75</b> | 0.46        | 0.34        | 0.11        |
| V                  | 0.66        | 0.02        | 0.63        | 0.22        |
| Ca                 | -0.13       | <b>0.96</b> | -0.14       | 0.22        |
| Sr                 | 0.05        | <b>0.93</b> | 0.23        | -0.09       |
| Al                 | 0.10        | <b>0.85</b> | 0.21        | 0.13        |
| Mg                 | 0.03        | <b>0.84</b> | -0.38       | 0.22        |
| Co                 | 0.38        | 0.67        | 0.58        | -0.09       |
| Li                 | 0.42        | 0.62        | 0.49        | 0.29        |
| Sb                 | 0.34        | 0.13        | <b>0.89</b> | 0.16        |
| Cu                 | 0.50        | -0.02       | <b>0.83</b> | 0.24        |
| PM <sub>2.5</sub>  | 0.60        | 0.04        | <b>0.74</b> | 0.19        |
| EC                 | 0.42        | 0.48        | <b>0.72</b> | 0.10        |
| K                  | 0.53        | 0.18        | 0.27        | <b>0.78</b> |
| Na                 | 0.26        | 0.47        | 0.34        | <b>0.66</b> |
| % of Expl.<br>Var. | 39          | 24          | 23          | 7           |

97 back trajectories for PM<sub>2.5</sub> samples collected in Winter.

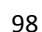



103 **Figure S3.** NOAA-HYSPLIT model (<http://ready.arl.noaa.gov/>) results illustrate air mass  
104 back trajectories for PM<sub>2.5</sub> samples collected in Spring.

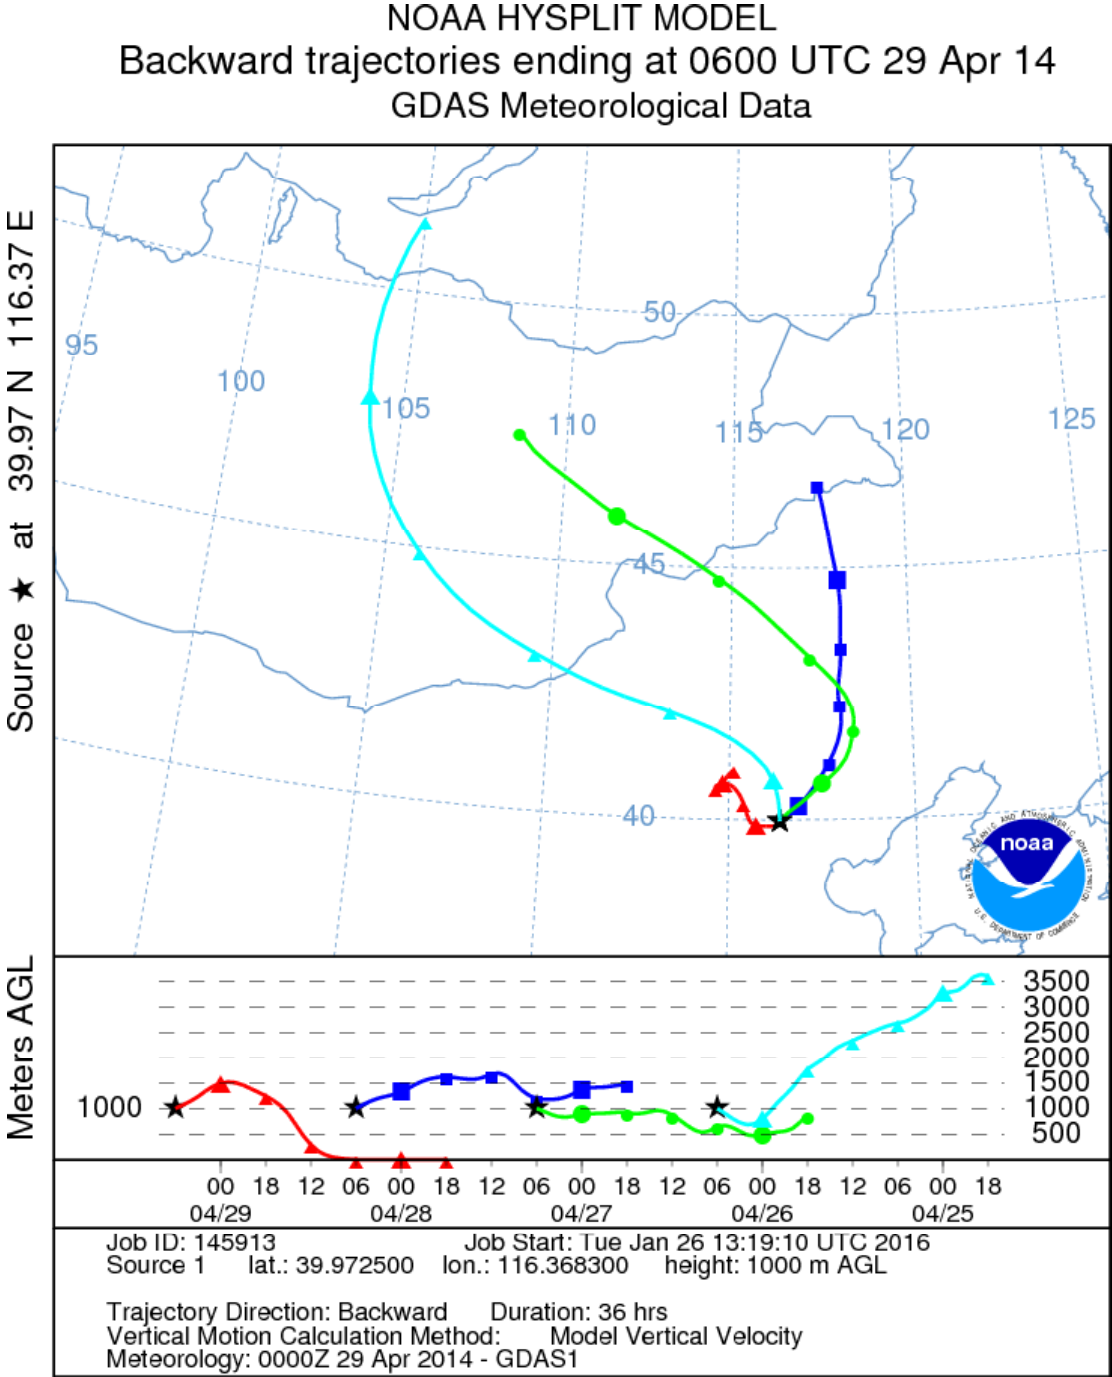

105

106 **Figure S4.** NOAA-HYSPLIT model (<http://ready.arl.noaa.gov/>) results illustrate air mass  
 107 back trajectories for PM<sub>2.5</sub> samples collected in early Summer.

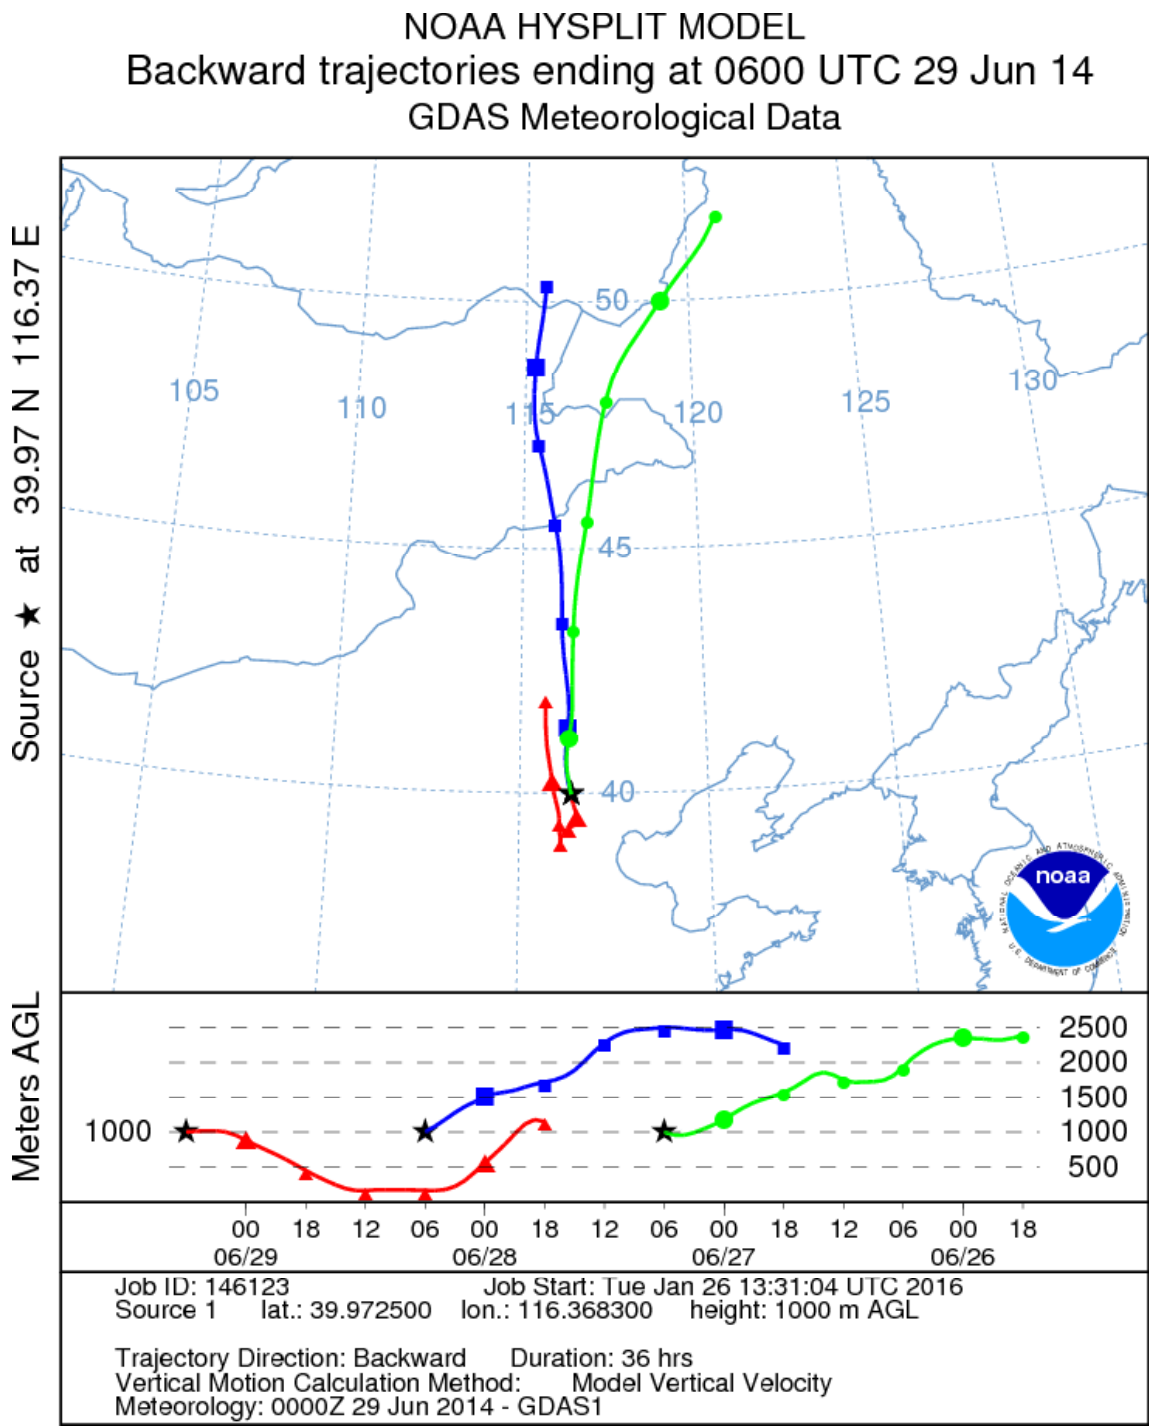

108

## REFERENCES

- Cao, J. J., Lee, S. C., Ho, K. F., Zou, S. C., Fung, K., Li, Y., Watson, J. G., and Chow, J. C.: Spatial and seasonal variations of atmospheric organic carbon and elemental carbon in Pearl River Delta Region, China, *Atmos. Environ.*, 38, 4447-4456, <http://dx.doi.org/10.1016/j.atmosenv.2004.05.016>, 2004.
- Castro, L. M., Pio, C. A., Harrison, R. M., and Smith, D. J. T.: Carbonaceous aerosol in urban and rural European atmospheres: Estimation of secondary organic carbon concentrations, *Atmos. Environ.*, 33, 2771-2781, [http://dx.doi.org/10.1016/S1352-2310\(98\)00331-8](http://dx.doi.org/10.1016/S1352-2310(98)00331-8), 1999.
- Chen, J. B., Gaillardet, J., Bouchez, J., Louvat, P., and Wang, Y. N.: Anthropophile elements in river sediments: Overview from the Seine River, France, *Geochem. Geophys. Geosyst.*, 15, 4526-4546, 2014.
- Lin, Y.-C., Hsu, S.-C., Chou, C. C.-K., Zhang, R., Wu, Y., Kao, S.-J., Luo, L., Huang, C.-H., Lin, S.-H., and Huang, Y.-T.: Wintertime haze deterioration in Beijing by industrial pollution deduced from trace metal fingerprints and enhanced health risk by heavy metals, *Environ. Pollut.*, 208, 284-293, 2016.
- Rengarajan, R., Sudheer, A., and Sarin, M.: Aerosol acidity and secondary organic aerosol formation during wintertime over urban environment in western India, *Atmos. Environ.*, 45, 1940-1945, 2011.
- Rudnick, R., and Gao, S.: Composition of the continental crust, *Treatise on Geochemistry*, 3, 1-64, 2003.
- Schleicher, N., Norra, S., Chen, Y., Chai, F., and Wang, S.: Efficiency of mitigation measures to reduce particulate air pollution: A case study during the Olympic Summer Games 2008 in Beijing, China, *Sci. Total Environ.*, 427-428, 146-158, <http://dx.doi.org/10.1016/j.scitotenv.2012.04.004>, 2012.
- Schleicher, N. J., Schäfer, J., Blanc, G., Chen, Y., Chai, F., Cen, K., and Norra, S.: Atmospheric particulate mercury in the megacity Beijing: Spatio-temporal variations and source apportionment, *Atmos. Environ.*, 109, 251-261, doi: 10.1016/j.atmosenv.2015.03.018, 2015.
- Visser, S., Slowik, J., Furger, M., Zotter, P., Bukowiecki, N., Dressler, R., Flechsig, U., Appel,

- K., Green, D., and Tremper, A.: Kerb and urban increment of highly time-resolved trace elements in PM<sub>10</sub>, PM<sub>2.5</sub> and PM<sub>1.0</sub> winter aerosol in London during ClearfLo 2012, *Atmos. Chem. Phys.*, 15, 2367-2386, 2015.
- Wang, Z., Chen, J., Feng, X., Hintelmann, H., Yuan, S., Cai, H., Huang, Q., Wang, S., and Wang, F.: Mass-dependent and mass-independent fractionation of mercury isotopes in precipitation from Guiyang, SW China, *C. R. Geosci.*, 347, 358-367, doi: 10.1016/j.crte.2015.02.006, 2015.
- Xu, H., Cao, J., Ho, K., Ding, H., Han, Y., Wang, G., Chow, J., Watson, J., Khol, S., and Qiang, J.: Lead concentrations in fine particulate matter after the phasing out of leaded gasoline in Xi'an, China, *Atmos. Environ.*, 46, 217-224, 2012.
- Yu, S., Dennis, R. L., Bhawe, P. V., and Eder, B. K.: Primary and secondary organic aerosols over the United States: Estimates on the basis of observed organic carbon (OC) and elemental carbon (EC), and air quality modeled primary OC/EC ratios, *Atmos. Environ.*, 38, 5257-5268, <http://dx.doi.org/10.1016/j.atmosenv.2004.02.064>, 2004.
- Zhang, Y., Wang, X., Chen, H., Yang, X., Chen, J., and Allen, J. O.: Source apportionment of lead-containing aerosol particles in Shanghai using single particle mass spectrometry, *Chemosphere*, 74, 501-507, 2009.
- Zheng, M., Salmon, L. G., Schauer, J. J., Zeng, L., Kiang, C. S., Zhang, Y., and Cass, G. R.: Seasonal trends in PM<sub>2.5</sub> source contributions in Beijing, China, *Atmos. Environ.*, 39, 3967-3976, doi: 10.1016/j.atmosenv.2005.03.036, 2005a.
- Zheng, X., Liu, X., Zhao, F., Duan, F., Yu, T., and H, C.: Seasonal characteristics of biomass burning contribution to Beijing aerosol, *Sci. China Ser. B*, 48, 481-488, doi: 10.1360/042005-15, 2005b.
